# Supplementary material for: Upregulation of Glycolytic Enzymes, Mitochondrial Dysfunction and Increased Cytotoxicity in Glial Cells Treated with Alzheimer’s Disease Plasma
Source: PubMed Central journal article supplement (PMC4364672; doi:10.1371/journal.pone.0116092), 2015-03-18
Supplement: pone.0116092.s003.pdf [file pone.0116092.s003.pdf]

**Table S1 - Normalised Total Spectra Counts for Control, MCI and AD plasma using Scaffold v4.3.4 (significantly altered proteins in bold)**

| #         | Identified Proteins (107)              | Accession Number          | AD plasma replicates |               |               |               | MCI Plasma replicates |               |               |               | Control plasma replicates |               |               |               |
|-----------|----------------------------------------|---------------------------|----------------------|---------------|---------------|---------------|-----------------------|---------------|---------------|---------------|---------------------------|---------------|---------------|---------------|
|           |                                        |                           | AD1                  | AD2           | AD3           | AD4           | MCI1                  | MCI2          | MCI3          | MCI4          | C1                        | C2            | C3            | C4            |
| 1         | Alpha-2-macroglobulin precursor        | gi 112911 (+2)            | 100.27               | 99.586        | 119.25        | 107.24        | 131.22                | 99.621        | 116.67        | 104.21        | 149.75                    | 162.1         | 122.29        | 98.57         |
| 2         | apolipoprotein B precursor             | [Hor gi 105990532 (+1)    | 93.535               | 112.74        | 89.439        | 89.941        | 131.95                | 124.53        | 90.063        | 73.558        | 74.876                    | 93.006        | 57.683        | 95.39         |
| 3         | Chain A, Human Serum Albumin           | gi 122920512 (+4)         | 86.052               | 115.24        | 83.051        | 65.726        | 137.05                | 132.62        | 75.735        | 67.428        | 81.562                    | 90.349        | 73.834        | 71.543        |
| 4         | complement component 3 precursor       | gi 115298678              | 94.283               | 84.554        | 112.86        | 103.78        | 110.08                | 104.6         | 112.58        | 112.38        | 116.33                    | 102.31        | 124.6         | 111.29        |
| 5         | keratin 1 [Homo sapiens], gi 39        | gi 11935049               | 53.876               | 57.622        | 83.051        | 53.619        | 35.721                | 39.226        | 96.204        | 149.16        | 52.815                    | 47.832        | 101.52        | 71.543        |
| 6         | fibrinogen, alpha polypeptide iso      | gi 11761629 (+2)          | 39.659               | 30.69         | 40.461        | 32.863        | 32.076                | 29.886        | 47.078        | 34.736        | 31.421                    | 30.559        | 41.532        | 41.336        |
| 7         | proapolipoprotein                      | gi 178775                 | 41.155               | 35.701        | 27.684        | 34.593        | 46.657                | 39.848        | 28.656        | 28.606        | 63.511                    | 53.146        | 23.073        | 31.797        |
| 8         | hCG2001591 [Homo sapiens]              | gi 119623974 (+2)         | 41.155               | 35.074        | 29.813        | 39.782        | 39.367                | 43.584        | 30.703        | 32.692        | 36.77                     | 39.195        | 29.995        | 42.926        |
| 9         | Chain A, Trypsin In Complex Wit        | gi 110590762 (+3)         | 23.945               | 17.537        | 10.648        | 17.296        | 29.889                | 29.264        | 12.281        | 6.1298        | 40.112                    | 35.209        | 16.151        | 22.258        |
| <b>10</b> | <b>fibrinogen, beta chain prepropr</b> | <b>gi 70906435</b>        | <b>36.666</b>        | <b>30.69</b>  | <b>63.885</b> | <b>41.511</b> | <b>34.263</b>         | <b>31.754</b> | <b>34.797</b> | <b>42.909</b> | <b>32.758</b>             | <b>27.902</b> | <b>50.761</b> | <b>47.695</b> |
| 11        | keratin 10 (epidermolytic hyperl       | gi 119581085 (+2)         | 26.938               | 40.711        | 53.238        | 13.837        | 18.225                | 15.566        | 47.078        | 63.342        | 28.079                    | 20.594        | 64.605        | 28.617        |
| 12        | similar to Keratin, type I cytoske     | gi 114667176              | 19.455               | 21.295        | 27.684        | 20.756        | 13.851                | 17.434        | 32.75         | 67.428        | 20.725                    | 21.923        | 34.61         | 12.719        |
| 13        | fibrinogen gamma chain, isoform        | gi 119625320 (+4)         | 29.183               | 23.174        | 12.777        | 13.837        | 28.431                | 25.528        | 20.469        | 12.26         | 28.079                    | 30.559        | 18.459        | 25.437        |
| 14        | keratin 2 [Homo sapiens], gi 64        | gi 47132620               | 29.183               | 27.558        | 63.885        | 19.026        | 19.683                | 21.169        | 55.266        | 55.169        | 31.421                    | 24.58         | 46.146        | 27.027        |
| 15        | ceruloplasmin (ferroxidase), iso       | gi 119599289 (+3)         | 23.945               | 21.921        | 17.036        | 13.837        | 23.328                | 20.547        | 18.422        | 12.26         | 16.713                    | 17.937        | 13.844        | 17.488        |
| <b>16</b> | <b>Fibronectin 1 [Homo sapiens],</b>   | <b>gi 109658664 (+11)</b> | <b>32.924</b>        | <b>38.206</b> | <b>29.813</b> | <b>27.674</b> | <b>19.683</b>         | <b>18.056</b> | <b>14.328</b> | <b>8.1731</b> | <b>18.719</b>             | <b>19.266</b> | <b>18.459</b> | <b>19.078</b> |
| 17        | Complement factor H precursor          | gi 158517847 (+3)         | 20.204               | 13.779        | 23.425        | 22.485        | 19.683                | 7.4716        | 22.516        | 20.433        | 14.039                    | 18.601        | 23.073        | 19.078        |
| 18        | inter-alpha (globulin) inhibitor H     | gi 119606782 (+3)         | 19.455               | 22.548        | 8.518         | 15.567        | 9.4771                | 10.585        | 12.281        | 8.1731        | 11.365                    | 15.944        | 11.537        | 12.719        |
| 19        | hemopexin [Homo sapiens], gi :         | gi 11321561 (+6)          | 11.224               | 12.527        | 10.648        | 5.1889        | 15.309                | 14.943        | 14.328        | 8.1731        | 16.045                    | 16.608        | 11.537        | 9.539         |
| 20        | inter-alpha (globulin) inhibitor H     | gi 119585668 (+3)         | 20.952               | 10.648        | 17.036        | 13.837        | 14.58                 | 11.83         | 14.328        | 10.216        | 13.371                    | 12.622        | 9.2293        | 20.668        |
| 21        | Chain A, Crystal Structure Of Th       | gi 28373620 (+1)          | 14.217               | 11.9          | 8.518         | 10.378        | 11.664                | 13.075        | 8.1875        | 12.26         | 15.376                    | 13.951        | 9.2293        | 15.898        |
| 22        | inter-alpha (globulin) inhibitor H     | gi 119585664 (+1)         | 13.469               | 20.042        | 12.777        | 10.378        | 10.206                | 12.453        | 16.375        | 16.346        | 7.3539                    | 11.294        | 16.151        | 11.129        |
| 23        | Chain A, Tertiary Structures Of T      | gi 2098257 (+3)           | 15.714               | 12.527        | 17.036        | 15.567        | 17.496                | 13.698        | 10.234        | 10.216        | 16.713                    | 15.28         | 18.459        | 17.488        |
| 24        | Complement factor B [Homo sa           | gi 13278732 (+2)          | 11.224               | 8.7686        | 4.259         | 5.1889        | 6.5611                | 9.9621        | 2.0469        | 4.0866        | 10.028                    | 11.294        | 4.6146        | 6.3594        |
| 25        | Chain I, 2.5a Crystal Structure O      | gi 52695711 (+1)          | 12.721               | 11.274        | 8.518         | 12.107        | 13.122                | 11.207        | 6.1407        | 6.1298        | 10.028                    | 7.972         | 6.922         | 17.488        |
| 26        | apolipoprotein A-IV precursor [T       | gi 178757 (+2)            | 11.224               | 9.3949        | 2.1295        | 1.7296        | 10.206                | 8.7168        | 4.0938        | 4.0866        | 9.3595                    | 8.6363        | 2.3073        | 4.7695        |
| 27        | gelsolin isoform 32                    | gi 114626427 (+2)         | 11.972               | 7.5159        | 4.259         | 10.378        | 10.206                | 9.9621        | 8.1875        | 10.216        | 8.691                     | 9.9649        | 4.6146        | 6.3594        |

|           |                                         |                          |               |               |               |               |               |               |               |               |               |               |               |               |
|-----------|-----------------------------------------|--------------------------|---------------|---------------|---------------|---------------|---------------|---------------|---------------|---------------|---------------|---------------|---------------|---------------|
| 28        | Chain A, Crystal Structure Of Cle       | gi 443345                | 6.7345        | 5.6369        | 12.777        | 19.026        | 5.1031        | 6.8489        | 14.328        | 10.216        | 4.0112        | 6.6433        | 16.151        | 12.719        |
| <b>29</b> | <b>complement component 1 inhil</b>     | <b>gi 114642584 (+8)</b> | <b>9.7276</b> | <b>7.5159</b> | <b>10.648</b> | <b>17.296</b> | <b>8.0191</b> | <b>7.4716</b> | <b>6.1407</b> | <b>8.1731</b> | <b>8.0225</b> | <b>9.9649</b> | <b>9.2293</b> | <b>12.719</b> |
| 30        | Complement component 5 [Hor             | gi 109731812 (+2)        | 5.9862        | 6.2633        | 4.259         | 8.6482        | 5.1031        | 5.6037        | 4.0938        | 6.1298        | 8.0225        | 8.6363        | 2.3073        | 11.129        |
| <b>31</b> | <b>Alpha-1B-glycoprotein precurs</b>    | <b>gi 46577680 (+1)</b>  | <b>6.7345</b> | <b>6.2633</b> | <b>10.648</b> | <b>6.9185</b> | <b>8.0191</b> | <b>6.8489</b> | <b>10.234</b> | <b>8.1731</b> | <b>6.6854</b> | <b>6.6433</b> | <b>4.6146</b> | <b>6.3594</b> |
| 32        | plasminogen                             | gi 387026 (+1)           | 6.7345        | 8.7686        | 2.1295        | 0             | 4.3741        | 8.7168        | 4.0938        | 0             | 5.3483        | 8.6363        | 6.922         | 1.5898        |
| 33        | Kininogen 1 [Homo sapiens]              | gi 37748641 (+2)         | 8.9794        | 6.2633        | 6.3885        | 12.107        | 9.4771        | 4.981         | 2.0469        | 6.1298        | 4.6798        | 5.979         | 11.537        | 6.3594        |
| 34        | apolipoprotein E mutant E3K             | gi 364011 (+1)           | 6.7345        | 5.6369        | 10.648        | 5.1889        | 4.3741        | 5.6037        | 8.1875        | 6.1298        | 4.0112        | 5.3146        | 9.2293        | 9.539         |
| 35        | alpha-1-microglobulin/bikunin           | pgi 4502067 (+1)         | 6.7345        | 6.8896        | 4.259         | 5.1889        | 5.8321        | 6.2263        | 4.0938        | 2.0433        | 5.3483        | 4.6503        | 6.922         | 3.1797        |
| <b>36</b> | <b>coagulation factor II (thrombin)</b> | <b>gi 119588383 (+4)</b> | <b>4.4897</b> | <b>5.6369</b> | <b>6.3885</b> | <b>8.6482</b> | <b>5.8321</b> | <b>6.2263</b> | <b>4.0938</b> | <b>6.1298</b> | <b>8.691</b>  | <b>9.3006</b> | <b>13.844</b> | <b>9.539</b>  |
| 37        | Angiotensinogen (serpin peptid          | gi 15079348 (+10)        | 9.7276        | 8.1422        | 10.648        | 8.6482        | 8.0191        | 7.4716        | 10.234        | 8.1731        | 8.0225        | 8.6363        | 4.6146        | 7.9492        |
| 38        | alpha-1-acid glycoprotein 1 prec        | gi 1197209 (+2)          | 6.7345        | 6.2633        | 4.259         | 3.4593        | 7.2901        | 5.6037        | 4.0938        | 4.0866        | 2.0056        | 5.979         | 2.3073        | 6.3594        |
| 39        | Alpha-2-HS-glycoprotein precur          | gi 112910 (+2)           | 6.7345        | 3.758         | 6.3885        | 6.9185        | 8.0191        | 4.3584        | 8.1875        | 2.0433        | 6.6854        | 5.3146        | 11.537        | 11.129        |
| 40        | haptoglobin, isoform CRA_a [Ho          | gi 119579598             | 9.7276        | 2.5053        | 2.1295        | 3.4593        | 6.5611        | 7.4716        | 4.0938        | 2.0433        | 3.3427        | 1.993         | 2.3073        | 1.5898        |
| 41        | apolipoprotein H precursor [Hor         | gi 153266841 (+2)        | 5.238         | 4.3843        | 0             | 1.7296        | 2.916         | 4.3584        | 2.0469        | 0             | 2.6742        | 5.3146        | 0             | 4.7695        |
| 42        | apolipoprotein J precursor              | gi 178855 (+6)           | 4.4897        | 1.879         | 2.1295        | 1.7296        | 3.645         | 2.4905        | 4.0938        | 4.0866        | 2.6742        | 1.993         | 0             | 7.9492        |
| 43        | Chain A, The Structure Of Penta         | gi 576259                | 4.4897        | 5.0106        | 4.259         | 3.4593        | 3.645         | 3.1132        | 6.1407        | 4.0866        | 4.0112        | 5.979         | 2.3073        | 3.1797        |
| 44        | apolipoprotein D, apoD [human           | gi 619383                | 2.9931        | 2.5053        | 4.259         | 3.4593        | 2.916         | 1.8679        | 4.0938        | 2.0433        | 2.6742        | 2.6573        | 4.6146        | 0             |
| 45        | retinol binding protein 4, plasm        | gi 119570453 (+6)        | 2.9931        | 2.5053        | 2.1295        | 1.7296        | 1.458         | 3.7358        | 0             | 0             | 2.6742        | 2.6573        | 2.3073        | 1.5898        |
| 46        | paraoxonase 1 [Homo sapiens],           | gi 19923106              | 4.4897        | 2.5053        | 4.259         | 1.7296        | 5.1031        | 2.4905        | 4.0938        | 4.0866        | 4.0112        | 3.3216        | 4.6146        | 1.5898        |
| 47        | Vitronectin [Homo sapiens], gi          | gi 13477169 (+2)         | 2.9931        | 3.1316        | 6.3885        | 3.4593        | 3.645         | 4.3584        | 4.0938        | 6.1298        | 3.3427        | 4.6503        | 6.922         | 3.1797        |
| <b>48</b> | <b>complement component 4 bind</b>      | <b>gi 4502503</b>        | <b>3.7414</b> | <b>3.1316</b> | <b>4.259</b>  | <b>6.9185</b> | <b>3.645</b>  | <b>3.7358</b> | <b>4.0938</b> | <b>2.0433</b> | <b>4.6798</b> | <b>2.6573</b> | <b>4.6146</b> | <b>4.7695</b> |
| 49        | histidine-rich glycoprotein prec        | gi 4504489               | 4.4897        | 6.8896        | 0             | 1.7296        | 1.458         | 1.8679        | 4.0938        | 4.0866        | 2.0056        | 1.993         | 6.922         | 3.1797        |
| 50        | Keratin, type I microfibrillar          | 48 kgi 125090            | 0             | 0             | 0             | 17.296        | 0             | 6.2263        | 0             | 0             | 0.6685        | 3.986         | 0             | 0             |
| 51        | similar to afamin                       | gi 114594313 (+1)        | 2.9931        | 3.758         | 2.1295        | 0             | 1.458         | 3.1132        | 2.0469        | 4.0866        | 1.3371        | 1.993         | 4.6146        | 3.1797        |
| 52        | complement component 6, isof            | gi 119576417 (+4)        | 4.4897        | 3.1316        | 0             | 6.9185        | 2.916         | 1.8679        | 4.0938        | 0             | 2.6742        | 2.6573        | 4.6146        | 1.5898        |
| 53        | unnamed protein product [Hom            | gi 158261613 (+1)        | 4.4897        | 3.1316        | 2.1295        | 1.7296        | 3.645         | 3.7358        | 2.0469        | 2.0433        | 3.3427        | 2.6573        | 0             | 7.9492        |
| 54        | type II intermediate-filament           | prgi 246276              | 0             | 0             | 0             | 19.026        | 0             | 4.981         | 0             | 0             | 0             | 0             | 0             | 0             |
| 55        | complement component 7, isof            | gi 119576411 (+4)        | 3.7414        | 4.3843        | 2.1295        | 3.4593        | 1.458         | 3.7358        | 4.0938        | 2.0433        | 2.6742        | 3.3216        | 0             | 1.5898        |
| 56        | heparin cofactor II isoform 1 [P        | agi 114685230 (+5)       | 1.4966        | 1.2527        | 2.1295        | 0             | 1.458         | 0.6226        | 0             | 2.0433        | 0.6685        | 1.3287        | 2.3073        | 4.7695        |
| 57        | complement component 9, isof            | gi 119576390 (+3)        | 5.238         | 3.758         | 2.1295        | 3.4593        | 4.3741        | 3.7358        | 4.0938        | 2.0433        | 2.6742        | 2.6573        | 4.6146        | 6.3594        |
| 58        | complement component 1, q su            | gi 150036344 (+5)        | 2.9931        | 1.879         | 2.1295        | 1.7296        | 2.916         | 1.8679        | 2.0469        | 2.0433        | 2.0056        | 2.6573        | 0             | 3.1797        |
| 59        | serine (or cysteine) proteinase         | igi 114665618 (+6)       | 2.2448        | 1.879         | 2.1295        | 3.4593        | 1.458         | 1.8679        | 4.0938        | 2.0433        | 2.0056        | 0.6643        | 6.922         | 7.9492        |
| 60        | unnamed protein product [Hom            | gi 16553735 (+2)         | 2.2448        | 1.2527        | 4.259         | 3.4593        | 1.458         | 1.8679        | 4.0938        | 2.0433        | 1.3371        | 2.6573        | 4.6146        | 4.7695        |

|           |                                                       |               |               |               |               |          |               |          |               |          |          |          |          |
|-----------|-------------------------------------------------------|---------------|---------------|---------------|---------------|----------|---------------|----------|---------------|----------|----------|----------|----------|
| 61        | inter-alpha (globulin) inhibitor Hgi 119585666 (+5)   | 1.4966        | 1.2527        | 2.1295        | 1.7296        | 2.187    | 1.8679        | 2.0469   | 0             | 1.3371   | 1.3287   | 2.3073   | 3.1797   |
| 62        | Complement component 8, gar gi 109731764 (+4)         | 2.2448        | 1.2527        | 2.1295        | 1.7296        | 1.458    | 1.2453        | 4.0938   | 2.0433        | 2.6742   | 1.3287   | 0        | 3.1797   |
| 63        | unnamed protein product [Hom gi 1335054               | 2.2448        | 0.6263        | 0             | 0             | 1.458    | 1.2453        | 8.1875   | 6.1298        | 2.0056   | 1.993    | 2.3073   | 3.1797   |
| 64        | serum amyloid A4, constitutive gi 10835095 (+3)       | 2.9931        | 1.2527        | 2.1295        | 0             | 0        | 1.8679        | 0        | 2.0433        | 0.6685   | 0.6643   | 0        | 1.5898   |
| 65        | keratin 5 [Homo sapiens], gi 14: gi 119395754 (+1)    | 0             | 10.021        | 4.259         | 0             | 0        | 0             | 6.1407   | 6.1298        | 5.3483   | 0        | 2.3073   | 6.3594   |
| 66        | hCG2040284 [Homo sapiens] gi 119598461 (+2)           | 2.2448        | 2.5053        | 0             | 0             | 1.458    | 2.4905        | 0        | 0             | 2.0056   | 1.3287   | 0        | 0        |
| 67        | alpha-1-acid glycoprotein 2 prec gi 29170378 (+2)     | 1.4966        | 1.879         | 4.259         | 1.7296        | 3.645    | 3.7358        | 2.0469   | 0             | 2.0056   | 3.986    | 0        | 1.5898   |
| 68        | Complement C1r subcomponen gi 115204 (+6)             | 2.2448        | 2.5053        | 0             | 1.7296        | 0.729    | 1.8679        | 0        | 2.0433        | 1.3371   | 2.6573   | 0        | 1.5898   |
| 69        | Chain A, Human Apolipoprotein gi 157831482            | 0             | 0             | 0             | 5.1889        | 0        | 0             | 2.0469   | 0             | 0        | 0        | 2.3073   | 0        |
| 70        | alpha S1 casein gi 159793187 (+6)                     | 0             | 0             | 4.259         | 0             | 0        | 0             | 6.1407   | 8.1731        | 0        | 0        | 6.922    | 0        |
| 71        | similar to Ficolin (collagen/fibrin gi 114555009 (+4) | 1.4966        | 1.879         | 2.1295        | 1.7296        | 1.458    | 1.2453        | 2.0469   | 0             | 1.3371   | 1.3287   | 2.3073   | 1.5898   |
| 72        | C-type lectin domain family 3, r gi 156627579 (+2)    | 0.7483        | 1.879         | 0             | 1.7296        | 0.729    | 1.2453        | 2.0469   | 0             | 2.0056   | 1.3287   | 2.3073   | 3.1797   |
| 73        | protein S (alpha) gi 114588068 (+5)                   | 0             | 0.6263        | 0             | 0             | 0        | 1.2453        | 4.0938   | 0             | 0.6685   | 1.3287   | 0        | 1.5898   |
| 74        | Kallikrein B, plasma (Fletcher fac gi 109659056 (+4)  | 0             | 3.1316        | 0             | 0             | 0        | 1.2453        | 0        | 0             | 2.0056   | 3.3216   | 0        | 0        |
| 75        | hair type II keratin intermediate gi 1308             | 0             | 0             | 0             | 20.756        | 0        | 8.0942        | 0        | 0             | 0        | 2.6573   | 0        | 0        |
| 76        | alpha-2-glycoprotein 1, zinc gi 114614917 (+6)        | 2.2448        | 1.2527        | 0             | 0             | 1.458    | 0.6226        | 0        | 2.0433        | 0.6685   | 0.6643   | 0        | 1.5898   |
| 77        | hypothetical protein LOC507421 gi 134085840           | 0             | 0             | 0             | 17.296        | 0        | 7.4716        | 0        | 0             | 0        | 0.6643   | 0        | 0        |
| 78        | alpha-2-plasmin inhibitor [Homo c gi 115583663 (+5)   | 0             | 1.2527        | 0             | 0             | 1.458    | 0.6226        | 0        | 0             | 1.3371   | 0.6643   | 2.3073   | 0        |
| 79        | apolipoprotein M [Homo sapien gi 22091452 (+1)        | 0.7483        | 0.6263        | 0             | 0             | 0        | 1.8679        | 0        | 0             | 0.6685   | 0        | 0        | 0        |
| 80        | Rubber elongation factor protei gi 132270             | 0.7483        | 0             | 0             | 1.7296        | 0        | 0             | 4.0938   | 2.0433        | 0        | 1.3287   | 2.3073   | 1.5898   |
| 81        | complement factor B isoform 1 gi 109070536            | 7.4828        | 6.8896        | 2.1295        | 3.4593        | 0        | 6.8489        | 0        | 0             | 6.6854   | 6.6433   | 0        | 0        |
| 82        | coagulation factor XII (Hagemangi 119605410 (+6)      | 1.4966        | 0.6263        | 0             | 1.7296        | 0        | 0             | 0        | 0             | 0        | 0        | 0        | 1.5898   |
| 83        | hypothetical protein LOC539595 gi 149642659           | 0             | 0             | 0             | 17.296        | 0        | 7.4716        | 0        | 0             | 0        | 0        | 0        | 0        |
| 84        | Chain A, Thyroxine-Binding Glob gi 114793604 (+5)     | 0.7483        | 1.2527        | 0             | 0             | 0.729    | 1.2453        | 0        | 0             | 0.6685   | 0.6643   | 0        | 0        |
| <b>85</b> | <b>complement component 2 prec gi 14550407 (+4)</b>   | <b>2.9931</b> | <b>2.5053</b> | <b>2.1295</b> | <b>3.4593</b> | <b>0</b> | <b>1.2453</b> | <b>0</b> | <b>2.0433</b> | <b>0</b> | <b>0</b> | <b>0</b> | <b>0</b> |
| 86        | keratin 6A [Homo sapiens] gi 114644568 (+5)           | 6.7345        | 11.274        | 0             | 0             | 0        | 0             | 0        | 6.1298        | 8.0225   | 0        | 0        | 4.7695   |
| 87        | pregnancy-zone protein isoform gi 114643429 (+4)      | 0             | 0             | 0             | 10.378        | 14.58    | 12.453        | 14.328   | 12.26         | 18.051   | 17.273   | 0        | 9.539    |
| 88        | hypothetical protein isoform 2 gi 114654573 (+4)      | 1.4966        | 1.2527        | 0             | 0             | 2.187    | 1.8679        | 0        | 0             | 0.6685   | 0        | 0        | 1.5898   |
| 89        | Chain A, Structural Changes Of T gi 1065033 (+143)    | 0.7483        | 0.6263        | 2.1295        | 0             | 0.729    | 1.2453        | 0        | 0             | 0.6685   | 0.6643   | 2.3073   | 0        |
| 90        | hemoglobin alpha-1 globin chair gi 13650074 (+22)     | 0.7483        | 0.6263        | 0             | 1.7296        | 0        | 1.2453        | 2.0469   | 0             | 0        | 0        | 0        | 3.1797   |
| 91        | lumican isoform 1 gi 114646184 (+4)                   | 0.7483        | 1.879         | 0             | 0             | 0        | 0             | 0        | 0             | 0        | 0        | 2.3073   | 0        |
| 92        | unnamed protein product [Hom gi 158257796 (+3)        | 0             | 2.5053        | 0             | 0             | 0        | 0             | 0        | 0             | 1.3371   | 2.6573   | 0        | 0        |
| 93        | complement component 8, beta; gi 119627047 (+4)       | 1.4966        | 1.2527        | 0             | 1.7296        | 0.729    | 0             | 2.0469   | 0             | 0        | 0        | 0        | 1.5898   |

|     |                                  |                   |        |        |       |        |   |        |        |        |        |        |        |        |
|-----|----------------------------------|-------------------|--------|--------|-------|--------|---|--------|--------|--------|--------|--------|--------|--------|
| 94  | similar to Fibrinogen beta chain | gi 119908847      | 2.9931 | 3.1316 | 0     | 0      | 0 | 3.1132 | 0      | 0      | 3.3427 | 1.993  | 6.922  | 0      |
| 95  | similar to apolipoprotein F      | gi 114644115 (+3) | 0.7483 | 0      | 0     | 0      | 0 | 1.2453 | 2.0469 | 0      | 0      | 0.6643 | 0      | 1.5898 |
| 96  | lipoprotein CIII                 | gi 224917         | 0      | 0.6263 | 4.259 | 3.4593 | 0 | 0      | 0      | 0      | 0      | 0      | 4.6146 | 0      |
| 97  | Human Vitamin D Binding Prote    | gi 18655424 (+1)  | 13.469 | 11.9   | 8.518 | 10.378 | 0 | 13.075 | 0      | 12.26  | 14.039 | 0      | 0      | 15.898 |
| 98  | complement component 8, alph     | gi 114556800 (+5) | 0.7483 | 1.2527 | 0     | 1.7296 | 0 | 0.6226 | 0      | 0      | 0.6685 | 0      | 0      | 0      |
| 99  | attractin, isoform CRA_b [Homo   | gi 119630936 (+6) | 0      | 0      | 0     | 0      | 0 | 0      | 2.0469 | 2.0433 | 0      | 1.3287 | 2.3073 | 0      |
| 100 | keratin associated protein 13.1  | gi 41350563       | 0      | 0      | 0     | 6.9185 | 0 | 0.6226 | 0      | 0      | 0      | 0      | 0      | 0      |
| 101 | hair keratin A1                  | gi 115495167      | 0      | 0      | 0     | 13.837 | 0 | 6.8489 | 0      | 0      | 0      | 0      | 0      | 0      |
| 102 | fibulin 1 isoform 3              | gi 109094533 (+5) | 0.7483 | 0.6263 | 0     | 0      | 0 | 0.6226 | 0      | 0      | 1.3371 | 0      | 0      | 0      |
| 103 | similar to fibrinogen, gamma ch  | gi 73977992 (+2)  | 0      | 8.1422 | 0     | 6.9185 | 0 | 0      | 0      | 0      | 0      | 0      | 0      | 12.719 |
| 104 | hypothetical protein             | gi 119922176 (+2) | 0      | 0      | 0     | 6.9185 | 0 | 0.6226 | 0      | 0      | 0      | 0      | 0      | 0      |
| 105 | Chain A, Apo-Human Serum Tra     | gi 110590597 (+6) | 0      | 1.879  | 0     | 0      | 0 | 0      | 0      | 0      | 0      | 0      | 0      | 0      |
| 106 | Chain A, Yeast Alcohol Dehydro   | gi 112491285 (+4) | 0      | 1.2527 | 0     | 0      | 0 | 0      | 0      | 0      | 0      | 0      | 0      | 0      |
| 107 | Keratin-associated protein 11-1  | gi 52783049       | 0      | 0      | 0     | 5.1889 | 0 | 0      | 0      | 0      | 0      | 0      | 0      | 0      |

Charge state deconvolution and deisotoping were not performed. All MS/MS samples were analysed using Mascot (Matrix Science, London, UK). Mascot was set up to search the NCBI nr database (33055681 entries). Mascot was searched with a fragment ion mass tolerance of 0.20Da and a parent tolerance of 0.25Da. Oxidation of methionine and iodoacetamide derivative of cysteine were specified as variable modifications.

Scaffold was used to validate MS/MS based peptide and protein identifications. Peptide identifications were accepted if they could be established at greater than 95.0% probability by the Peptide Prophet algorithm. Protein identifications were accepted if they could be established at greater than 99.0% probability and contained at least 2 identified peptides. Protein probabilities were assigned by the Protein Prophet algorithm.
