# Supplementary material for: Upregulation of Glycolytic Enzymes, Mitochondrial Dysfunction and Increased Cytotoxicity in Glial Cells Treated with Alzheimer’s Disease Plasma
Source: PubMed Central journal article supplement (PMC4364672; doi:10.1371/journal.pone.0116092), 2015-03-18
Supplement: pone.0116092.s004.pdf [file pone.0116092.s004.pdf]

**Table S2 - Protein Summary for iTRAQ Experiment with microglia treated with human control, MCI and AD plasma from Protein Pilot v4.0**

**114:** Microglia treated with Control Plasma replicate 1; **115:** Microglia treated with MCI plasma replicate 1; **116:** Microglia treated with AD plasma replicate 1  
**117:** Microglia treated with Fetal Bovine Serum

**118:** Microglia treated with Control plasma replicate 2; **119:** Microglia treated with MCI plasma replicate 2; **121:** Microglia treated with AD plasma replicate 2

Upregulated proteins are shown in red and downregulated proteins are shown in blue

| Unused | %Cov<br>(95) | Accession    | Name                                                              | Peptides<br>(95%) | 114:117 | PVal<br>114:117 | 115:117 | PVal<br>115:117 | 116:117  | PVal<br>116:117 | 118:117 | PVal<br>118:117 | 119:117  | PVal<br>119:117 | 121:117 | PVal<br>121:117 |
|--------|--------------|--------------|-------------------------------------------------------------------|-------------------|---------|-----------------|---------|-----------------|----------|-----------------|---------|-----------------|----------|-----------------|---------|-----------------|
| 50.27  | 72.54        | gi 7669492   | glyceraldehyde-3-phosphate dehydrogenase isoform 1 [Homo sapiens] | 62                | 0.97414 | 0.52389         | 0.9826  | 0.676093        | 1.273859 | 3.43E-05        | 1.02487 | 0.60275         | 0.976086 | 0.65477         | 1.31801 | 0.0001          |
| 64.83  | 76.27        | gi 4503571   | alpha-enolase isoform 1 [Homo sapiens]                            | 62                | 0.9323  | 0.11964         | 0.98826 | 0.719005        | 1.192321 | 0.00027         | 0.98271 | 0.75327         | 0.97853  | 0.55307         | 1.22469 | 0.000105        |
| 42.89  | 55.88        | gi 4505763   | phosphoglycerate kinase 1 [Homo sapiens]                          | 27                | 1.07208 | 0.17501         | 1.0474  | 0.279231        | 1.203913 | 7.01E-05        | 1.04557 | 0.32215         | 1.062029 | 0.20679         | 1.30616 | 0.000111        |
| 38.22  | 61.48        | gi 342187211 | fructose-bisphosphate aldolase A isoform 2 [Homo sapiens]         | 27                | 0.98961 | 0.82864         | 1.01971 | 0.836449        | 1.204599 | 0.00446         | 1.00107 | 0.9894          | 1.000761 | 0.99085         | 1.2183  | 0.001405        |
| 77.64  | 69.11        | gi 33286418  | pyruvate kinase isozymes M1/M2 isoform a [Homo sapiens]           | 49                | 0.97698 | 0.74623         | 1.00909 | 0.869057        | 1.22076  | 0.00752         | 1.02407 | 0.72615         | 1.027908 | 0.59976         | 1.2245  | 0.001615        |
| 49.96  | 46.39        | gi 4507521   | transketolase isoform 1 [Homo sapiens]                            | 34                | 0.9812  | 0.68558         | 1.04368 | 0.323134        | 1.130957 | 0.02218         | 1.01055 | 0.88087         | 0.987174 | 0.74884         | 1.15666 | 0.001681        |
| 74.49  | 23.07        | gi 38176300  | nestin [Homo sapiens]                                             | 42                | 0.98677 | 0.77329         | 0.96911 | 0.518102        | 0.943442 | 0.17346         | 0.99888 | 0.98412         | 1.036204 | 0.35449         | 0.85376 | 0.004498        |

|       |       |              |                                                                                             |    |         |         |         |          |          |         |         |         |          |         |         |          |
|-------|-------|--------------|---------------------------------------------------------------------------------------------|----|---------|---------|---------|----------|----------|---------|---------|---------|----------|---------|---------|----------|
| 37.03 | 38.85 | gi 66933005  | calnexin precursor<br>[Homo sapiens]                                                        | 22 | 0.99713 | 0.94162 | 0.94451 | 0.31514  | 0.924302 | 0.26575 | 0.9798  | 0.70005 | 0.932549 | 0.14875 | 0.87883 | 0.010136 |
| 59.84 | 72.51 | gi 4503471   | elongation factor 1-<br>alpha 1 [Homo<br>sapiens]                                           | 54 | 0.96687 | 0.49315 | 0.93464 | 0.225032 | 1.131237 | 0.0241  | 1.02401 | 0.75967 | 0.967436 | 0.56314 | 1.24135 | 0.014366 |
| 27.94 | 29.73 | gi 19920317  | cytoskeleton-<br>associated protein 4<br>[Homo sapiens]                                     | 17 | 0.84689 | 0.04873 | 0.92014 | 0.229067 | 0.736276 | 0.0001  | 0.76848 | 0.01158 | 0.78562  | 0.03204 | 0.76711 | 0.018819 |
| 30.5  | 47.73 | gi 5031973   | protein disulfide-<br>isomerase A6<br>precursor [Homo<br>sapiens]                           | 22 | 0.9654  | 0.42869 | 0.944   | 0.133813 | 0.957242 | 0.54622 | 0.97927 | 0.66221 | 1.002759 | 0.95171 | 0.90975 | 0.019165 |
| 20.99 | 59.3  | gi 4505591   | peroxiredoxin-1<br>[Homo sapiens]                                                           | 15 | 1.01122 | 0.8714  | 1.00843 | 0.871252 | 1.071734 | 0.22303 | 0.95462 | 0.37925 | 0.963405 | 0.47862 | 1.1723  | 0.021238 |
| 5.22  | 13.15 | gi 214010226 | 40S ribosomal<br>protein S24 isoform d<br>[Homo sapiens]                                    | 4  | 0.67916 | 0.06245 | 0.75061 | 0.010725 | 0.60023  | 0.06339 | 0.66105 | 0.01456 | 0.664317 | 0.08515 | 0.63548 | 0.021809 |
| 18.45 | 46.15 | gi 4506713   | ubiquitin-40S<br>ribosomal protein<br>S27a precursor<br>[Homo sapiens]                      | 11 | 0.98274 | 0.73773 | 1.05902 | 0.285887 | 0.836245 | 0.0664  | 0.82362 | 0.15854 | 1.037765 | 0.59399 | 0.77292 | 0.022464 |
| 13.76 | 19.9  | gi 66346681  | plasminogen activator<br>inhibitor 1 RNA-<br>binding protein<br>isoform 2 [Homo<br>sapiens] | 7  | 1.04273 | 0.58745 | 1.00011 | 0.999016 | 0.966927 | 0.6123  | 0.98868 | 0.92202 | 0.927851 | 0.47639 | 0.78652 | 0.023336 |
| 21.89 | 15.51 | gi 44680105  | caldesmon isoform 1<br>[Homo sapiens]                                                       | 11 | 0.90827 | 0.1536  | 0.89843 | 0.174139 | 0.874096 | 0.0854  | 0.97455 | 0.77315 | 0.936821 | 0.47815 | 0.85601 | 0.026671 |
| 41.45 | 38.13 | gi 4505257   | moesin [Homo<br>sapiens]                                                                    | 23 | 1.07974 | 0.26539 | 1.11677 | 0.105786 | 1.224702 | 0.02088 | 1.13547 | 0.24289 | 1.029872 | 0.72063 | 1.20124 | 0.028037 |
| 38.53 | 62.14 | gi 4502101   | annexin A1 [Homo<br>sapiens]                                                                | 23 | 1.00008 | 0.99855 | 0.92705 | 0.161224 | 0.872665 | 0.02261 | 0.98702 | 0.84843 | 1.015028 | 0.79418 | 0.8338  | 0.042088 |
| 17.57 | 59.43 | gi 4503057   | alpha-crystallin B<br>chain [Homo sapiens]                                                  | 12 | 1.03866 | 0.42864 | 1.04427 | 0.449927 | 1.237261 | 0.00212 | 1.02433 | 0.71835 | 0.994397 | 0.93124 | 1.26081 | 0.042824 |
| 2.32  | 12.63 | gi 54792069  | small ubiquitin-<br>related modifier 2<br>isoform a precursor<br>[Homo sapiens]             | 2  | 1.14799 | 0.29051 | 1.45937 | 0.083382 | 1.231096 | 0.26043 | 1.01658 | 0.94786 | 1.407796 | 0.05217 | 1.28827 | 0.043238 |

|       |       |              |                                                                  |    |         |         |         |          |          |         |         |         |          |         |         |          |
|-------|-------|--------------|------------------------------------------------------------------|----|---------|---------|---------|----------|----------|---------|---------|---------|----------|---------|---------|----------|
| 9.54  | 13.73 | gi 109637759 | calpastatin isoform f [Homo sapiens]                             | 7  | 0.86253 | 0.228   | 0.80906 | 0.239705 | 0.817004 | 0.20571 | 0.74525 | 0.1378  | 0.884395 | 0.46022 | 0.74361 | 0.045267 |
| 6.64  | 22.73 | gi 4557585   | fatty acid-binding protein, brain [Homo sapiens]                 | 4  | 0.85065 | 0.21974 | 0.79912 | 0.227698 | 0.90105  | 0.24714 | 0.84292 | 0.17597 | 0.873763 | 0.35343 | 0.83176 | 0.049333 |
| 12.44 | 24.27 | gi 4503143   | cathepsin D preproprotein [Homo sapiens]                         | 10 | 0.95791 | 0.58116 | 1.0536  | 0.628932 | 1.106723 | 0.5541  | 1.06446 | 0.69411 | 0.9615   | 0.74084 | 1.16945 | 0.058726 |
| 50.95 | 32.2  | gi 153792590 | heat shock protein HSP 90-alpha isoform 1 [Homo sapiens]         | 33 | 1.03008 | 0.67865 | 1.06218 | 0.512408 | 1.299528 | 0.03574 | 1.04757 | 0.60122 | 1.055205 | 0.4726  | 1.20463 | 0.058983 |
| 45.71 | 56.44 | gi 21361657  | protein disulfide-isomerase A3 precursor [Homo sapiens]          | 37 | 0.9619  | 0.42744 | 0.89756 | 0.012721 | 0.924691 | 0.11729 | 0.98181 | 0.65258 | 0.995083 | 0.87086 | 0.89188 | 0.059792 |
| 14.84 | 80    | gi 5032057   | protein S100-A11 [Homo sapiens]                                  | 16 | 1.04077 | 0.52822 | 0.94971 | 0.423999 | 0.863005 | 0.05467 | 1.04763 | 0.46558 | 0.98643  | 0.82636 | 0.86681 | 0.060101 |
| 15.61 | 63.49 | gi 31543380  | protein DJ-1 [Homo sapiens]                                      | 8  | 0.87038 | 0.05065 | 1.0421  | 0.587302 | 1.041927 | 0.75125 | 0.95154 | 0.45415 | 0.994383 | 0.95366 | 1.16939 | 0.069841 |
| 18.16 | 57.3  | gi 66392203  | NME1-NME2 protein [Homo sapiens]                                 | 11 | 1.05003 | 0.63669 | 1.05967 | 0.740323 | 1.119333 | 0.36696 | 1.10984 | 0.37772 | 1.046986 | 0.7303  | 1.22055 | 0.086404 |
| 25.24 | 38.67 | gi 20149594  | heat shock protein HSP 90-beta [Homo sapiens]                    | 33 | 0.94769 | 0.31531 | 1.04297 | 0.30697  | 1.114919 | 0.12151 | 1.03159 | 0.49331 | 1.024515 | 0.70189 | 1.12563 | 0.088957 |
| 11.8  | 13.04 | gi 56699409  | RNA-binding motif protein, X chromosome isoform 1 [Homo sapiens] | 6  | 0.92096 | 0.49133 | 0.87494 | 0.158879 | 0.877598 | 0.12292 | 1.0088  | 0.9293  | 0.966318 | 0.74655 | 0.87719 | 0.094431 |
| 14.68 | 48.24 | gi 5803225   | 14-3-3 protein epsilon [Homo sapiens]                            | 16 | 1.02601 | 0.76029 | 0.91136 | 0.328953 | 1.11497  | 0.15435 | 0.96656 | 0.78874 | 0.960346 | 0.44181 | 1.14985 | 0.097089 |
| 52.59 | 69.47 | gi 50845388  | annexin A2 isoform 1 [Homo sapiens]                              | 52 | 1.03601 | 0.33861 | 0.89261 | 0.000799 | 0.952177 | 0.19231 | 1.09683 | 0.02102 | 0.986273 | 0.64679 | 0.93349 | 0.100108 |
| 7.85  | 53.99 | gi 4885375   | histone H1.2 [Homo sapiens]                                      | 16 | 0.87375 | 0.05937 | 0.7433  | 0.00219  | 0.542623 | 0.00103 | 0.73003 | 0.00159 | 0.947048 | 0.46755 | 0.75976 | 0.101682 |

|       |       |              |                                                                      |    |         |         |         |          |          |         |         |         |          |         |         |          |
|-------|-------|--------------|----------------------------------------------------------------------|----|---------|---------|---------|----------|----------|---------|---------|---------|----------|---------|---------|----------|
| 9.2   | 24.44 | gi 4506661   | 60S ribosomal protein L7a [Homo sapiens]                             | 6  | 1.12561 | 0.37809 | 1.10248 | 0.529482 | 1.115835 | 0.16495 | 1.03566 | 0.61818 | 1.010542 | 0.93949 | 1.25406 | 0.104774 |
| 65.26 | 54.13 | gi 16507237  | 78 kDa glucose-regulated protein precursor [Homo sapiens]            | 42 | 0.99068 | 0.80644 | 0.91924 | 0.037995 | 0.914667 | 0.10089 | 0.97414 | 0.72851 | 0.975383 | 0.64284 | 0.90792 | 0.107537 |
| 33.69 | 65.68 | gi 21735621  | malate dehydrogenase, mitochondrial precursor [Homo sapiens]         | 21 | 0.98306 | 0.72628 | 0.96187 | 0.550987 | 1.082983 | 0.19161 | 0.99879 | 0.98249 | 1.003288 | 0.95569 | 1.09901 | 0.108722 |
| 8.57  | 6.298 | gi 4504763   | integrin alpha-V isoform 1 precursor [Homo sapiens]                  | 6  | 1.10731 | 0.34169 | 1.50407 | 0.12905  | 0.922235 | 0.67208 | 1.35084 | 0.4102  | 1.65825  | 0.06426 | 1.25584 | 0.110681 |
| 3.27  | 3.004 | gi 38327625  | citrate synthase, mitochondrial precursor [Homo sapiens]             | 2  | 0.90179 | 0.42891 | 1.04244 | 0.800114 | 0.948916 | 0.85177 | 1.10885 | 0.48796 | 0.896501 | 0.31286 | 1.30983 | 0.112072 |
| 2.03  | 1.04  | gi 4505541   | general vesicular transport factor p115 [Homo sapiens]               | 1  | 1.03    | 0.9444  | 1.16908 | 0.359291 | 1.468988 | 0.16016 | 1.34375 | 0.59047 | 1.403052 | 0.25749 | 1.86084 | 0.114754 |
| 11.64 | 4.447 | gi 223029410 | talin-1 [Homo sapiens]                                               | 7  | 0.7748  | 0.08765 | 1.01838 | 0.916424 | 0.810045 | 0.62668 | 0.53988 | 0.04862 | 0.830302 | 0.16782 | 0.80491 | 0.115327 |
| 15.01 | 30.56 | gi 24431933  | reticulon-4 isoform B [Homo sapiens]                                 | 9  | 1.03261 | 0.79202 | 0.92584 | 0.443218 | 0.86613  | 0.3369  | 0.98962 | 0.93193 | 0.999494 | 0.99403 | 0.75832 | 0.118577 |
| 2.22  | 40.45 | gi 4502389   | barrier-to-autointegration factor [Homo sapiens]                     | 3  | 1.01481 | 0.90604 | 0.79065 | 0.497285 | 0.785352 | 0.47056 | 0.77148 | 0.48763 | 1.065285 | 0.63782 | 0.60144 | 0.122476 |
| 8.24  | 21.8  | gi 15431297  | 60S ribosomal protein L13 isoform 1 [Homo sapiens]                   | 6  | 1.00852 | 0.94051 | 1.04466 | 0.512794 | 0.999406 | 0.99678 | 0.99211 | 0.96695 | 1.008986 | 0.93835 | 0.85176 | 0.122519 |
| 6     | 11.89 | gi 169404009 | translocon-associated protein subunit alpha precursor [Homo sapiens] | 3  | 0.95232 | 0.61818 | 0.87112 | 0.397806 | 0.856702 | 0.23079 | 1.06776 | 0.59316 | 0.959057 | 0.73145 | 0.80544 | 0.122538 |

|       |       |             |                                                                                             |    |         |         |         |          |          |         |         |         |          |         |         |          |
|-------|-------|-------------|---------------------------------------------------------------------------------------------|----|---------|---------|---------|----------|----------|---------|---------|---------|----------|---------|---------|----------|
| 4.09  | 37.5  | gi 51036603 | guanine nucleotide-binding protein G(I)/G(S)/G(O) subunit gamma-12 precursor [Homo sapiens] | 3  | 0.82618 | 0.40915 | 0.66391 | 0.07069  | 0.823514 | 0.43842 | 0.91099 | 0.71981 | 0.765134 | 0.40552 | 0.64208 | 0.124749 |
| 19.89 | 60.61 | gi 10863927 | peptidyl-prolyl cis-trans isomerase A [Homo sapiens]                                        | 21 | 0.98345 | 0.72502 | 1.04141 | 0.522254 | 1.157293 | 0.14108 | 1.04379 | 0.67672 | 1.040531 | 0.7547  | 1.13552 | 0.125378 |
| 14.61 | 62.86 | gi 4826898  | profilin-1 [Homo sapiens]                                                                   | 11 | 0.93252 | 0.25277 | 0.9354  | 0.272724 | 1.1113   | 0.10339 | 0.95098 | 0.4023  | 0.930043 | 0.40442 | 1.13055 | 0.127681 |
| 13.22 | 18.74 | gi 20127408 | trifunctional enzyme subunit alpha, mitochondrial precursor [Homo sapiens]                  | 9  | 0.93017 | 0.43003 | 0.88367 | 0.537465 | 0.804996 | 0.40295 | 1.0888  | 0.67464 | 0.886635 | 0.51654 | 0.85087 | 0.130116 |
| 12.73 | 20    | gi 24797067 | HLA class I histocompatibility antigen, A-1 alpha chain precursor [Homo sapiens]            | 8  | 0.88901 | 0.29354 | 0.94676 | 0.494894 | 0.929581 | 0.37731 | 0.97793 | 0.82815 | 0.935571 | 0.41568 | 0.85741 | 0.130658 |
| 6.37  | 14.08 | gi 7019415  | protein transport protein Sec61 subunit alpha isoform 1 [Homo sapiens]                      | 5  | 0.79339 | 0.19075 | 0.97595 | 0.796917 | 0.744264 | 0.37933 | 0.62065 | 0.1723  | 0.702107 | 0.27466 | 0.70581 | 0.136075 |
| 8.35  | 6.289 | gi 68509926 | putative pre-mRNA-splicing factor ATP-dependent RNA helicase DHX15 [Homo sapiens]           | 5  | 0.62423 | 0.18212 | 0.47583 | 0.334467 | 1.130629 | 0.43257 | 0.77012 | 0.46447 | 0.811996 | 0.64092 | 0.49002 | 0.13646  |
| 2.12  | 4.664 | gi 38201710 | probable ATP-dependent RNA helicase DDX17 isoform 1 [Homo sapiens]                          | 3  | 0.79915 | 0.61738 | 0.91094 | 0.620215 | 0.750311 | 0.21345 | 0.80939 | 0.28139 | 0.780581 | 0.24321 | 0.63829 | 0.138851 |

|       |       |              |                                                                                           |    |         |         |         |          |          |         |         |         |          |         |         |          |
|-------|-------|--------------|-------------------------------------------------------------------------------------------|----|---------|---------|---------|----------|----------|---------|---------|---------|----------|---------|---------|----------|
| 4.2   | 5.383 | gi 4757732   | apoptosis-inducing factor 1, mitochondrial isoform 1 precursor [Homo sapiens] THO complex | 2  | 1.38271 | 0.07172 | 1.19782 | 0.407886 | 1.088847 | 0.41412 | 1.28989 | 0.41554 | 1.162864 | 0.38478 | 1.34436 | 0.140307 |
| 10.12 | 24.62 | gi 238776833 | subunit 4 [Homo sapiens]                                                                  | 6  | 0.83702 | 0.04946 | 0.94848 | 0.403375 | 0.86749  | 0.31273 | 0.87675 | 0.42273 | 0.897684 | 0.40794 | 0.88435 | 0.14495  |
| 12.3  | 43.94 | gi 32189392  | peroxiredoxin-2 isoform a [Homo sapiens]                                                  | 10 | 1.34013 | 0.09637 | 1.27568 | 0.14954  | 1.190778 | 0.02567 | 1.19692 | 0.26779 | 1.15698  | 0.45387 | 1.28334 | 0.145991 |
| 1.35  | 2.03  | gi 124494254 | proliferation-associated protein 2G4 [Homo sapiens]                                       | 1  | 0.96538 | 0.89731 | 1.35889 | 0.039772 | 1.239406 | 0.2757  | 0.98931 | 0.97425 | 1.219182 | 0.19368 | 1.14722 | 0.146018 |
| 4.09  | 14.1  | gi 19923437  | GTP:AMP phosphotransferase, mitochondrial isoform a [Homo sapiens]                        | 3  | 1.39625 | 0.08317 | 1.46051 | 0.046626 | 1.432712 | 0.05166 | 1.27401 | 0.37104 | 1.138681 | 0.44    | 1.42747 | 0.148779 |
| 20.35 | 55.61 | gi 21361091  | ubiquitin carboxyl-terminal hydrolase isozyme L1 [Homo sapiens]                           | 12 | 0.94536 | 0.55362 | 1.07884 | 0.312914 | 1.099702 | 0.14413 | 0.92686 | 0.5639  | 0.969563 | 0.73363 | 1.14064 | 0.149277 |
| 5.99  | 11.48 | gi 14141159  | heterogeneous nuclear ribonucleoprotein H3 isoform b [Homo sapiens]                       | 5  | 0.8342  | 0.1545  | 0.96127 | 0.711873 | 0.817383 | 0.18652 | 0.86804 | 0.22181 | 0.778232 | 0.09066 | 0.71379 | 0.153676 |
| 56.1  | 51.55 | gi 5729877   | heat shock cognate 71 kDa protein isoform 1 [Homo sapiens]                                | 39 | 1.02418 | 0.63104 | 0.9707  | 0.403987 | 1.061664 | 0.19288 | 0.9861  | 0.86555 | 0.965753 | 0.41121 | 1.06446 | 0.153957 |
| 10.03 | 23.65 | gi 4557032   | L-lactate dehydrogenase B chain [Homo sapiens]                                            | 6  | 0.93851 | 0.60795 | 1.08169 | 0.304175 | 1.185435 | 0.06437 | 0.88422 | 0.54126 | 1.059711 | 0.73119 | 1.12483 | 0.154941 |

|       |       |             |                                                                                                |    |         |         |         |          |          |         |         |         |          |         |         |          |
|-------|-------|-------------|------------------------------------------------------------------------------------------------|----|---------|---------|---------|----------|----------|---------|---------|---------|----------|---------|---------|----------|
| 5.92  | 32    | gi 48255933 | non-histone<br>chromosomal protein<br>HMG-14 [Homo<br>sapiens]                                 | 3  | 0.91603 | 0.6829  | 0.98843 | 0.959112 | 0.811181 | 0.18646 | 0.82704 | 0.40778 | 0.919272 | 0.33885 | 0.87101 | 0.160101 |
| 13    | 45.56 | gi 4507651  | tropomyosin alpha-4<br>chain isoform 2<br>[Homo sapiens]                                       | 13 | 0.9197  | 0.35893 | 0.94139 | 0.238868 | 0.978656 | 0.86419 | 0.77351 | 0.09697 | 0.898614 | 0.18298 | 0.88635 | 0.160554 |
| 2.03  | 11.8  | gi 15451856 | caveolin-1 isoform<br>alpha [Homo sapiens]                                                     | 1  | 0.99581 | 0.97294 | 0.88967 | 0.446766 | 0.866877 | 0.38527 | 0.89103 | 0.45106 | 0.978481 | 0.86208 | 0.68415 | 0.162168 |
| 7.77  | 28.87 | gi 4506761  | protein S100-A10<br>[Homo sapiens]                                                             | 6  | 1.05949 | 0.39457 | 0.98038 | 0.763376 | 0.915157 | 0.21142 | 0.9942  | 0.92867 | 1.068271 | 0.33669 | 0.83821 | 0.162865 |
| 10.9  | 34.94 | gi 94721252 | vesicle-associated<br>membrane protein-<br>associated protein A<br>isoform 2 [Homo<br>sapiens] | 8  | 1.227   | 0.01851 | 0.97704 | 0.71228  | 1.185619 | 0.34812 | 1.26298 | 0.03566 | 1.170574 | 0.09287 | 1.22005 | 0.164682 |
| 8.4   | 33.14 | gi 4507669  | translationally-<br>controlled tumor<br>protein [Homo<br>sapiens]                              | 6  | 1.08576 | 0.52472 | 1.09398 | 0.508183 | 1.116665 | 0.46569 | 1.13494 | 0.37263 | 1.084082 | 0.68352 | 1.23937 | 0.170834 |
| 2.02  | 10.25 | gi 25188179 | voltage-dependent<br>anion-selective<br>channel protein 3<br>isoform 1 [Homo<br>sapiens]       | 3  | 1.02508 | 0.91757 | 1.16013 | 0.376609 | 1.484604 | 0.36729 | 1.26373 | 0.25659 | 0.81173  | 0.69302 | 1.54434 | 0.177514 |
| 2.17  | 10.84 | gi 17158044 | 40S ribosomal<br>protein S6 [Homo<br>sapiens]                                                  | 2  | 0.95076 | 0.6196  | 0.82852 | 0.091434 | 0.738315 | 0.04109 | 0.53979 | 0.06305 | 0.69574  | 0.1722  | 0.71755 | 0.1779   |
| 21.82 | 4.09  | gi 33350932 | cytoplasmic dynein 1<br>heavy chain 1 [Homo<br>sapiens]                                        | 13 | 1.57248 | 0.29762 | 1.57923 | 0.217808 | 1.282865 | 0.35371 | 1.80211 | 0.13401 | 1.017224 | 0.96817 | 1.5064  | 0.181445 |
| 1.53  | 7.064 | gi 50592988 | cytochrome b-c1<br>complex subunit 2,<br>mitochondrial<br>precursor [Homo<br>sapiens]          | 2  | 0.81533 | 0.4452  | 0.69962 | 0.31094  | 0.740066 | 0.414   | 0.68865 | 0.20942 | 0.423321 | 0.20012 | 0.70978 | 0.181631 |

|       |       |              |                                                                                 |    |         |         |         |          |          |         |         |         |          |         |         |          |
|-------|-------|--------------|---------------------------------------------------------------------------------|----|---------|---------|---------|----------|----------|---------|---------|---------|----------|---------|---------|----------|
| 9.16  | 12.75 | gi 24307939  | T-complex protein 1 subunit epsilon [Homo sapiens]                              | 6  | 0.88391 | 0.83878 | 1.03728 | 0.930669 | 1.416377 | 0.6002  | 1.44063 | 0.48371 | 1.130974 | 0.78207 | 0.69751 | 0.182052 |
| 25.85 | 24.2  | gi 19923142  | importin subunit beta-1 [Homo sapiens]                                          | 17 | 1.05472 | 0.72744 | 1.03584 | 0.67655  | 1.133016 | 0.19697 | 1.16673 | 0.15872 | 0.998602 | 0.98495 | 1.13234 | 0.185815 |
| 6.49  | 17.1  | gi 38372925  | basigin isoform 2 [Homo sapiens]                                                | 4  | 1.01305 | 0.85925 | 1.00488 | 0.960318 | 0.988465 | 0.91265 | 0.947   | 0.49923 | 1.10776  | 0.58434 | 0.89814 | 0.189596 |
| 2.12  | 14.29 | gi 78214522  | 60S ribosomal protein L38 [Homo sapiens]                                        | 1  | 0.96672 | 0.84305 | 0.91545 | 0.719896 | 0.828098 | 0.3865  | 0.66688 | 0.42456 | 1.096426 | 0.88091 | 0.40804 | 0.191292 |
| 3.66  | 11.28 | gi 5729875   | membrane-associated progesterone receptor component 1 [Homo sapiens]            | 3  | 1.29932 | 0.22776 | 1.19393 | 0.255245 | 0.922448 | 0.82759 | 1.2013  | 0.35792 | 1.273844 | 0.11659 | 1.30413 | 0.191907 |
| 1.96  | 2.809 | gi 5803023   | vesicular integral-membrane protein VIP36 precursor [Homo sapiens]              | 1  | 1.25437 | 0.44629 | 0.9238  | 0.572269 | 1.003053 | 0.9813  | 1.24652 | 0.57488 | 0.725378 | 0.19242 | 0.72577 | 0.192623 |
| 19.62 | 28.1  | gi 5032093   | neutral amino acid transporter B(0) isoform 1 [Homo sapiens]                    | 14 | 0.99773 | 0.98539 | 0.97139 | 0.597192 | 0.993195 | 0.94792 | 1.06033 | 0.30024 | 1.012247 | 0.93042 | 0.90298 | 0.192785 |
| 9.28  | 12.15 | gi 7657581   | calcium-binding mitochondrial carrier protein Aralar2 isoform 2 [Homo sapiens]  | 5  | 1.24309 | 0.38294 | 1.04897 | 0.552228 | 1.137596 | 0.35039 | 1.21757 | 0.22643 | 1.018496 | 0.82502 | 0.77457 | 0.197527 |
| 18.48 | 34.01 | gi 194248072 | heat shock 70 kDa protein 1A/1B [Homo sapiens]                                  | 20 | 1.00579 | 0.94158 | 1.09057 | 0.121139 | 1.049526 | 0.65628 | 1.07026 | 0.41274 | 0.957757 | 0.53605 | 1.1032  | 0.200776 |
| 11.01 | 27.06 | gi 11321585  | guanine nucleotide-binding protein G(I)/G(S)/G(T) subunit beta-1 [Homo sapiens] | 7  | 0.73007 | 0.19568 | 0.64127 | 0.141431 | 0.681516 | 0.19847 | 0.71464 | 0.34485 | 1.037866 | 0.77339 | 0.74014 | 0.204888 |

|       |       |              |                                                                      |    |         |         |         |          |          |         |         |         |          |         |         |          |
|-------|-------|--------------|----------------------------------------------------------------------|----|---------|---------|---------|----------|----------|---------|---------|---------|----------|---------|---------|----------|
| 11.47 | 43.36 | gi 4885381   | histone H1.5 [Homo sapiens]                                          | 15 | 0.83443 | 0.01052 | 0.79034 | 0.005847 | 0.651536 | 0.00034 | 0.77306 | 0.05702 | 0.897578 | 0.16378 | 0.84588 | 0.205013 |
| 16.9  | 14.2  | gi 156523968 | poly [ADP-ribose] polymerase 1 [Homo sapiens]                        | 10 | 1.21558 | 0.14288 | 1.17066 | 0.120212 | 1.051162 | 0.47741 | 1.0265  | 0.87789 | 1.061355 | 0.76352 | 1.172   | 0.207123 |
| 3.04  | 3.187 | gi 77404397  | staphylococcal nuclease domain-containing protein 1 [Homo sapiens]   | 3  | 1.17405 | 0.49812 | 1.22773 | 0.468987 | 1.488215 | 0.12081 | 1.08531 | 0.69621 | 1.110144 | 0.54598 | 1.36789 | 0.210295 |
| 4.76  | 5.495 | gi 4503583   | epoxide hydrolase 1 precursor [Homo sapiens]                         | 2  | 0.84869 | 0.29741 | 0.72711 | 0.197375 | 1.081442 | 0.45904 | 0.87687 | 0.24494 | 0.884422 | 0.60119 | 0.86167 | 0.213117 |
| 8.71  | 24.41 | gi 9845502   | 40S ribosomal protein SA [Homo sapiens]                              | 6  | 1.03724 | 0.74771 | 1.08735 | 0.352101 | 1.152088 | 0.1949  | 1.2666  | 0.02453 | 0.950464 | 0.75669 | 1.16312 | 0.215801 |
| 4.14  | 24.35 | gi 4506631   | 60S ribosomal protein L30 [Homo sapiens]                             | 2  | 1.14158 | 0.69687 | 1.10043 | 0.803557 | 1.054163 | 0.80851 | 1.05796 | 0.56652 | 1.038772 | 0.81646 | 1.12587 | 0.218553 |
| 8.3   | 22.18 | gi 11559923  | eukaryotic translation initiation factor 4H isoform 1 [Homo sapiens] | 5  | 1.12264 | 0.68798 | 1.25954 | 0.340565 | 1.042103 | 0.8514  | 1.01228 | 0.88499 | 1.066275 | 0.614   | 1.09901 | 0.225424 |
| 8.28  | 13.87 | gi 40068518  | 6-phosphogluconate dehydrogenase, decarboxylating [Homo sapiens]     | 5  | 0.81545 | 0.14339 | 0.94935 | 0.623335 | 1.02256  | 0.78535 | 0.79003 | 0.11995 | 0.8653   | 0.35679 | 0.77777 | 0.227224 |
| 2.11  | 3.371 | gi 24797106  | FAS-associated factor 2 [Homo sapiens]                               | 1  | 1.06334 | 0.65017 | 1.45771 | 0.417112 | 1.365147 | 0.33565 | 1.01105 | 0.94592 | 1.360478 | 0.20061 | 1.30254 | 0.231693 |
| 2.58  | 9.594 | gi 5453549   | peroxiredoxin-4 precursor [Homo sapiens]                             | 3  | 1.09696 | 0.59119 | 1.16346 | 0.599874 | 1.087432 | 0.78277 | 1.19647 | 0.61772 | 1.284313 | 0.55549 | 1.31451 | 0.235158 |
| 3.24  | 7.754 | gi 23397429  | eukaryotic translation initiation factor 3 subunit M [Homo sapiens]  | 2  | 0.89871 | 0.47538 | 1.31111 | 0.222737 | 1.013742 | 0.93117 | 0.81456 | 0.2861  | 1.138485 | 0.56671 | 1.28961 | 0.236077 |

|       |       |              |                                                                               |    |         |         |         |          |          |         |         |         |          |         |         |          |
|-------|-------|--------------|-------------------------------------------------------------------------------|----|---------|---------|---------|----------|----------|---------|---------|---------|----------|---------|---------|----------|
| 2.02  | 4.537 | gi 162329583 | cleavage and polyadenylation specificity factor subunit 6 [Homo sapiens]      | 1  | 0.90214 | 0.50643 | 1.11391 | 0.867037 | 1.458042 | 0.54873 | 1.06447 | 0.65983 | 1.296901 | 0.68157 | 1.30871 | 0.236755 |
| 18.46 | 13.39 | gi 237681109 | sodium/potassium-transporting ATPase subunit alpha-1 isoform c [Homo sapiens] | 18 | 1.02552 | 0.80461 | 1.00024 | 0.998588 | 0.844812 | 0.12679 | 0.91605 | 0.50142 | 0.914821 | 0.38021 | 0.91843 | 0.239598 |
| 8.82  | 21.58 | gi 14251209  | chloride intracellular channel protein 1 [Homo sapiens]                       | 6  | 0.90088 | 0.30114 | 0.95147 | 0.772095 | 1.09574  | 0.46797 | 0.96541 | 0.77434 | 0.984818 | 0.91828 | 0.88861 | 0.24316  |
| 4.53  | 6.239 | gi 109389365 | glucose-6-phosphate 1-dehydrogenase isoform a [Homo sapiens]                  | 2  | 1.20426 | 0.33865 | 1.43066 | 0.189014 | 1.624618 | 0.2636  | 1.55257 | 0.22793 | 1.448891 | 0.23758 | 1.30435 | 0.249744 |
| 6.35  | 24.44 | gi 7657532   | protein S100-A6 [Homo sapiens]                                                | 3  | 0.98566 | 0.85809 | 1.09844 | 0.296211 | 1.059034 | 0.49517 | 1.03444 | 0.67966 | 1.031681 | 0.7023  | 1.1115  | 0.250352 |
| 21.3  | 42.45 | gi 5803227   | 14-3-3 protein theta [Homo sapiens]                                           | 17 | 0.97905 | 0.87629 | 1.0435  | 0.605723 | 0.966232 | 0.87085 | 0.92408 | 0.61253 | 1.178148 | 0.16    | 1.1743  | 0.251827 |
| 2     | 8.744 | gi 88953571  | PREDICTED: POTE ankyrin domain family member I isoform 2 [Homo sapiens]       | 34 | 0.86459 | 0.70652 | 0.90932 | 0.524006 | 0.832067 | 0.32213 | 0.85508 | 0.3682  | 0.725671 | 0.19692 | 0.78485 | 0.253517 |
| 32.32 | 35.84 | gi 5031877   | lamin-B1 isoform 1 [Homo sapiens]                                             | 18 | 0.94349 | 0.56293 | 0.90136 | 0.275431 | 0.918949 | 0.44907 | 0.93501 | 0.4858  | 0.893712 | 0.32872 | 0.89476 | 0.254337 |
| 5.39  | 11.56 | gi 4501853   | 3-ketoacyl-CoA thiolase, peroxisomal isoform a [Homo sapiens]                 | 3  | 2.16834 | 0.1858  | 1.18441 | 0.641874 | 1.62163  | 0.13731 | 1.42343 | 0.17432 | 1.2076   | 0.45654 | 1.25897 | 0.259562 |
| 4.3   | 9.246 | gi 7661920   | eukaryotic initiation factor 4A-III [Homo sapiens]                            | 2  | 1.29956 | 0.34769 | 1.01607 | 0.902547 | 1.212463 | 0.31844 | 1.27806 | 0.42026 | 0.783348 | 0.76584 | 0.79002 | 0.262826 |
| 50.42 | 31.55 | gi 55956788  | nucleolin [Homo sapiens]                                                      | 29 | 1.05759 | 0.23708 | 1.02976 | 0.572142 | 0.98183  | 0.74371 | 1.09084 | 0.15784 | 1.007521 | 0.87671 | 1.05735 | 0.263211 |

|       |       |              |                                                                   |     |         |         |         |          |          |         |         |         |          |         |         |          |
|-------|-------|--------------|-------------------------------------------------------------------|-----|---------|---------|---------|----------|----------|---------|---------|---------|----------|---------|---------|----------|
| 2.95  | 3.655 | gi 308818200 | dihydropyrimidinase-related protein 3 isoform 1 [Homo sapiens]    | 2   | 1.34309 | 0.06857 | 1.2031  | 0.161372 | 0.967412 | 0.85001 | 1.52203 | 0.03584 | 1.210626 | 0.5645  | 1.23319 | 0.263459 |
| 24.27 | 32.08 | gi 23308577  | D-3-phosphoglycerate dehydrogenase [Homo sapiens]                 | 17  | 1.06596 | 0.47514 | 0.97881 | 0.832898 | 1.203403 | 0.08204 | 1.02448 | 0.76084 | 1.029579 | 0.60888 | 1.15234 | 0.267369 |
| 25.86 | 13.07 | gi 4758012   | clathrin heavy chain 1 [Homo sapiens]                             | 16  | 0.99052 | 0.92065 | 0.94667 | 0.522496 | 1.13722  | 0.24734 | 0.88892 | 0.13223 | 0.916398 | 0.48145 | 1.09911 | 0.268588 |
| 2.16  | 30.23 | gi 4502985   | cytochrome c oxidase subunit 6B1 [Homo sapiens]                   | 2   | 0.90839 | 0.35899 | 0.88557 | 0.684512 | 0.735976 | 0.10006 | 0.76604 | 0.22395 | 0.772901 | 0.17148 | 0.81212 | 0.274825 |
| 31.87 | 8.225 | gi 153945728 | microtubule-associated protein 1B [Homo sapiens]                  | 17  | 0.94326 | 0.58955 | 0.9836  | 0.825151 | 0.952414 | 0.62219 | 0.87584 | 0.26177 | 0.900398 | 0.23709 | 0.88394 | 0.275407 |
| 85.56 | 84.33 | gi 62414289  | vimentin [Homo sapiens]                                           | 111 | 0.96853 | 0.22969 | 0.8979  | 0.00024  | 0.966613 | 0.26142 | 0.99839 | 0.96544 | 0.992586 | 0.77803 | 0.96001 | 0.276668 |
| 85.56 | 84.33 | gi 62414289  | vimentin [Homo sapiens]                                           | 111 | 0.96853 | 0.22969 | 0.8979  | 0.00024  | 0.966613 | 0.26142 | 0.99839 | 0.96544 | 0.992586 | 0.77803 | 0.96001 | 0.276668 |
| 6.4   | 27.31 | gi 5453555   | GTP-binding nuclear protein Ran [Homo sapiens]                    | 5   | 0.98859 | 0.87907 | 1.14585 | 0.42636  | 1.194501 | 0.25584 | 1.03131 | 0.69113 | 0.94485  | 0.71941 | 1.14543 | 0.276881 |
| 6.52  | 14.19 | gi 4507171   | SPARC precursor [Homo sapiens]                                    | 3   | 0.9158  | 0.47886 | 1.02166 | 0.864754 | 0.936253 | 0.51281 | 0.94402 | 0.83367 | 0.974326 | 0.78471 | 0.73391 | 0.27843  |
| 32.05 | 53.69 | gi 32189394  | ATP synthase subunit beta, mitochondrial precursor [Homo sapiens] | 26  | 1.06947 | 0.33782 | 1.02526 | 0.810252 | 1.085629 | 0.19352 | 1.06683 | 0.36414 | 1.062145 | 0.36963 | 1.05613 | 0.282311 |
| 15.14 | 32.7  | gi 4502551   | calumenin isoform a precursor [Homo sapiens]                      | 11  | 1.0541  | 0.35248 | 0.92044 | 0.374923 | 1.046819 | 0.65407 | 1.02137 | 0.84663 | 1.013005 | 0.8751  | 0.90294 | 0.28484  |
| 30.99 | 46.28 | gi 4757900   | calreticulin precursor [Homo sapiens]                             | 22  | 0.97558 | 0.48559 | 0.9151  | 0.110982 | 0.924536 | 0.15201 | 1.02055 | 0.6353  | 1.000256 | 0.99424 | 0.94295 | 0.285087 |

|       |       |              |                                                                                           |    |         |         |         |          |          |         |         |         |          |         |         |          |
|-------|-------|--------------|-------------------------------------------------------------------------------------------|----|---------|---------|---------|----------|----------|---------|---------|---------|----------|---------|---------|----------|
| 3.78  | 13.38 | gi 4506619   | 60S ribosomal protein L24 [Homo sapiens]                                                  | 2  | 0.88742 | 0.57195 | 0.87413 | 0.254582 | 0.97148  | 0.78669 | 0.90032 | 0.34225 | 0.858709 | 0.57737 | 0.81159 | 0.285288 |
| 4.33  | 12.64 | gi 19557691  | surfeit locus protein 4 [Homo sapiens]                                                    | 3  | 1.07383 | 0.75128 | 0.79406 | 0.111418 | 0.815363 | 0.65159 | 1.00065 | 0.99896 | 0.826807 | 0.64556 | 0.68096 | 0.286924 |
| 14.4  | 25.05 | gi 34147630  | elongation factor Tu, mitochondrial precursor [Homo sapiens]                              | 8  | 1.24054 | 0.2593  | 1.00401 | 0.978324 | 1.262414 | 0.32398 | 1.23422 | 0.17278 | 1.179966 | 0.2319  | 1.20203 | 0.287698 |
| 4.03  | 20    | gi 262118227 | cytochrome c oxidase subunit 7A2, mitochondrial precursor [Homo sapiens]                  | 2  | 1.1199  | 0.72902 | 0.90201 | 0.486512 | 0.756671 | 0.2722  | 1.38307 | 0.18831 | 0.946541 | 0.67701 | 1.2207  | 0.292914 |
| 9.55  | 32.21 | gi 5901912   | calmodulin [Homo sapiens]                                                                 | 4  | 0.97733 | 0.85572 | 1.0233  | 0.851035 | 1.04108  | 0.74264 | 0.91374 | 0.49865 | 1.008276 | 0.91537 | 0.83326 | 0.292997 |
| 6.37  | 5.497 | gi 157694492 | myb-binding protein 1A isoform 2 [Homo sapiens]                                           | 5  | 1.00363 | 0.98643 | 0.9421  | 0.906806 | 0.905539 | 0.52855 | 1.10364 | 0.52725 | 0.925595 | 0.78667 | 0.80372 | 0.296452 |
| 4.38  | 38.46 | gi 4504253   | histone H2A.x [Homo sapiens]                                                              | 55 | 1.02226 | 0.91213 | 0.96013 | 0.770314 | 0.821872 | 0.25679 | 1.0363  | 0.92006 | 0.957424 | 0.76937 | 0.90772 | 0.304709 |
| 8.06  | 17.58 | gi 4506003   | serine/threonine-protein phosphatase PP1-alpha catalytic subunit isoform 1 [Homo sapiens] | 6  | 1.48714 | 0.13004 | 1.10011 | 0.713846 | 1.277277 | 0.52397 | 1.33377 | 0.25545 | 1.172138 | 0.4535  | 1.28387 | 0.30728  |
| 11.93 | 21.53 | gi 42794771  | thioredoxin domain-containing protein 5 isoform 1 precursor [Homo sapiens]                | 7  | 1.14981 | 0.0688  | 1.00059 | 0.996582 | 1.070191 | 0.40696 | 0.96876 | 0.79451 | 0.947137 | 0.80295 | 1.09618 | 0.309544 |
| 2.19  | 4.61  | gi 4504619   | insulin-like growth factor-binding protein 7 isoform 1 precursor [Homo sapiens]           | 1  | 0.84172 | 0.29423 | 0.98065 | 0.834212 | 1.054621 | 0.66737 | 1.60677 | 0.49731 | 1.126455 | 0.67446 | 0.83734 | 0.310771 |

|       |       |              |                                                                                                                                                                                                             |    |         |         |         |          |          |         |         |         |          |         |         |          |
|-------|-------|--------------|-------------------------------------------------------------------------------------------------------------------------------------------------------------------------------------------------------------|----|---------|---------|---------|----------|----------|---------|---------|---------|----------|---------|---------|----------|
| 4.4   | 7.745 | gi 4557809   | ornithine<br>aminotransferase,<br>mitochondrial<br>isoform 1 [Homo<br>sapiens]<br>endoplasmic<br>reticulum resident                                                                                         | 6  | 1.24849 | 0.12014 | 1.16548 | 0.620637 | 1.100635 | 0.88714 | 0.97603 | 0.91645 | 1.240592 | 0.14432 | 1.12319 | 0.31102  |
| 5.62  | 16.48 | gi 5803013   | protein 29 isoform 1<br>precursor [Homo<br>sapiens]<br>NAD(P)H<br>dehydrogenase<br>[quinone] 1 isoform a<br>[Homo sapiens]                                                                                  | 4  | 0.84553 | 0.25641 | 1.10238 | 0.275949 | 1.055268 | 0.87182 | 0.88294 | 0.27119 | 0.94896  | 0.7498  | 1.17577 | 0.31394  |
| 6.07  | 16.79 | gi 4505415   | phosphatidylethanolamine-binding protein<br>1 preproprotein<br>[Homo sapiens]                                                                                                                               | 5  | 1.36635 | 0.37502 | 1.01123 | 0.930016 | 1.33663  | 0.34932 | 1.45685 | 0.29703 | 1.027479 | 0.83314 | 1.57378 | 0.314236 |
| 2.22  | 7.487 | gi 4505621   | 60S ribosomal<br>protein L15 isoform 1<br>[Homo sapiens]<br>40S ribosomal<br>protein S5 [Homo<br>sapiens]                                                                                                   | 1  | 0.96277 | 0.8957  | 1.09319 | 0.533952 | 0.903624 | 0.4929  | 1.02145 | 0.91865 | 1.219476 | 0.35161 | 1.19588 | 0.321973 |
| 2.68  | 4.412 | gi 358356404 | actin, alpha skeletal<br>muscle [Homo<br>sapiens]<br>heat shock protein<br>beta-1 [Homo<br>sapiens]<br>prostaglandin E<br>synthase 3 [Homo<br>sapiens]<br>ATP-dependent RNA<br>helicase A [Homo<br>sapiens] | 1  | 0.87189 | 0.36029 | 0.93705 | 0.674173 | 1.013222 | 0.93016 | 1.11807 | 0.32778 | 1.005237 | 0.93799 | 0.93831 | 0.322112 |
| 9.7   | 31.86 | gi 13904870  |                                                                                                                                                                                                             | 7  | 0.9506  | 0.72658 | 1.0316  | 0.603441 | 0.924649 | 0.46719 | 0.99064 | 0.95691 | 1.001791 | 0.98677 | 1.091   | 0.322428 |
| 2.2   | 48.28 | gi 4501881   |                                                                                                                                                                                                             | 84 | 0.70402 | 0.19171 | 0.88213 | 0.452415 | 0.895226 | 0.49113 | 0.9076  | 0.68294 | 0.910421 | 0.74174 | 0.83025 | 0.335221 |
| 20.35 | 61.46 | gi 4504517   |                                                                                                                                                                                                             | 14 | 1.03033 | 0.75301 | 1.09164 | 0.398213 | 1.129264 | 0.45398 | 1.07204 | 0.36605 | 1.008009 | 0.93325 | 1.14863 | 0.335319 |
| 3     | 15.63 | gi 23308579  |                                                                                                                                                                                                             | 2  | 1.09274 | 0.60681 | 1.33151 | 0.112159 | 1.200575 | 0.47968 | 1.17833 | 0.45949 | 1.215746 | 0.48534 | 1.12312 | 0.341192 |
| 37.36 | 23.31 | gi 100913206 |                                                                                                                                                                                                             | 25 | 1.01038 | 0.85557 | 0.98092 | 0.810188 | 1.026626 | 0.71249 | 0.99051 | 0.9034  | 0.908446 | 0.21786 | 0.93231 | 0.343017 |

|       |       |             |                                                                                                             |    |         |         |         |          |          |         |         |         |          |         |         |          |
|-------|-------|-------------|-------------------------------------------------------------------------------------------------------------|----|---------|---------|---------|----------|----------|---------|---------|---------|----------|---------|---------|----------|
| 6     | 15.03 | gi 5453597  | F-actin-capping protein subunit alpha-1 [Homo sapiens]                                                      | 3  | 1.08743 | 0.8451  | 1.19702 | 0.574836 | 1.148574 | 0.63926 | 0.8406  | 0.67537 | 1.190998 | 0.50429 | 1.17969 | 0.344035 |
| 1.67  | 8.013 | gi 7705855  | estradiol 17-beta-dehydrogenase 12 [Homo sapiens]                                                           | 2  | 1.35665 | 0.14963 | 1.58221 | 0.299346 | 1.327157 | 0.60819 | 0.82147 | 0.54246 | 2.201652 | 0.16227 | 1.17915 | 0.348877 |
| 32.68 | 55.25 | gi 4885379  | histone H1.4 [Homo sapiens]                                                                                 | 18 | 0.86188 | 0.15805 | 0.79458 | 0.062715 | 0.581451 | 0.00631 | 0.783   | 0.05277 | 0.955935 | 0.61036 | 0.78812 | 0.349009 |
| 20.58 | 32.02 | gi 4503529  | eukaryotic initiation factor 4A-I isoform 1 [Homo sapiens]                                                  | 13 | 1.04269 | 0.74889 | 1.03994 | 0.678853 | 1.271338 | 0.05202 | 1.0321  | 0.8665  | 0.954919 | 0.82177 | 1.16915 | 0.351373 |
| 4.88  | 14.38 | gi 4506691  | 40S ribosomal protein S16 [Homo sapiens]                                                                    | 2  | 0.97562 | 0.80498 | 1.08435 | 0.534558 | 0.91199  | 0.46498 | 0.90795 | 0.25085 | 1.061548 | 0.63913 | 1.08996 | 0.352086 |
| 5.35  | 21.47 | gi 89903012 | cell division control protein 42 homolog isoform 1 [Homo sapiens]                                           | 4  | 0.84946 | 0.37036 | 0.96503 | 0.661392 | 0.873435 | 0.40147 | 0.85893 | 0.56613 | 0.93952  | 0.65745 | 0.8919  | 0.363234 |
| 4.28  | 8.456 | gi 4826659  | F-actin-capping protein subunit beta isoform 1 [Homo sapiens]                                               | 2  | 0.67802 | 0.35754 | 0.69959 | 0.172607 | 0.851274 | 0.65389 | 0.86143 | 0.37487 | 0.66671  | 0.15342 | 0.85952 | 0.369847 |
| 16.25 | 8.025 | gi 7669550  | vinculin isoform meta-VCL [Homo sapiens]                                                                    | 7  | 0.88768 | 0.17609 | 0.86082 | 0.075983 | 0.892825 | 0.45546 | 0.90485 | 0.43053 | 0.975215 | 0.86887 | 0.89204 | 0.37485  |
| 16.66 | 23.14 | gi 35493916 | dolichyl-diphosphooligosaccharide--protein glycosyltransferase subunit 2 isoform 1 precursor [Homo sapiens] | 16 | 0.97184 | 0.85688 | 0.82452 | 0.080194 | 0.845658 | 0.09154 | 0.94712 | 0.71073 | 0.862415 | 0.34484 | 0.82828 | 0.378348 |
| 14    | 22.43 | gi 4758112  | spliceosome RNA helicase DDX39B [Homo sapiens]                                                              | 11 | 0.76734 | 0.20451 | 1.11319 | 0.323403 | 0.756887 | 0.24072 | 1.25882 | 0.36395 | 0.926787 | 0.45626 | 0.75424 | 0.37859  |
| 11.59 | 15.71 | gi 7549809  | plastin-3 isoform 1 [Homo sapiens]                                                                          | 9  | 1.12989 | 0.64507 | 0.90527 | 0.733379 | 1.317888 | 0.17397 | 0.86056 | 0.69041 | 0.96376  | 0.83803 | 1.20141 | 0.379589 |

|       |       |             |                                                                                                  |   |         |         |         |          |          |         |         |         |          |         |         |          |
|-------|-------|-------------|--------------------------------------------------------------------------------------------------|---|---------|---------|---------|----------|----------|---------|---------|---------|----------|---------|---------|----------|
| 14.51 | 18.85 | gi 21361399 | serine/threonine-protein phosphatase 2A 65 kDa regulatory subunit A alpha isoform [Homo sapiens] | 9 | 0.85201 | 0.64513 | 0.93269 | 0.807974 | 1.291011 | 0.53085 | 1.19777 | 0.7306  | 1.030423 | 0.92072 | 1.31892 | 0.380861 |
| 11.33 | 36.02 | gi 4758504  | 3-hydroxyacyl-CoA dehydrogenase type-2 isoform 1 [Homo sapiens]                                  | 5 | 1.16862 | 0.44494 | 1.33119 | 0.096689 | 1.177838 | 0.49    | 1.0947  | 0.79475 | 1.573738 | 0.01477 | 1.13974 | 0.381154 |
| 3.4   | 19.47 | gi 4503253  | dolichyl-diphosphooligosacch aride--protein glycosyltransferase subunit DAD1 [Homo sapiens]      | 2 | 0.97294 | 0.92271 | 1.26859 | 0.287512 | 1.130249 | 0.50102 | 1.09105 | 0.81061 | 0.985191 | 0.90638 | 1.15704 | 0.386139 |
| 3.13  | 8.871 | gi 5902076  | serine/arginine-rich splicing factor 1 isoform 1 [Homo sapiens]                                  | 2 | 0.80818 | 0.51448 | 0.95702 | 0.88235  | 0.88861  | 0.73781 | 0.93516 | 0.86581 | 0.90713  | 0.71945 | 0.74119 | 0.387206 |
| 4.11  | 4.595 | gi 4826686  | ATP-dependent RNA helicase DDX1 [Homo sapiens]                                                   | 2 | 0.96152 | 0.7616  | 0.50291 | 0.169483 | 0.979637 | 0.92474 | 1.28961 | 0.57091 | 0.61504  | 0.12877 | 0.86852 | 0.391631 |
| 10.29 | 11.88 | gi 55956899 | keratin, type I cytoskeletal 9 [Homo sapiens]                                                    | 6 | 0.859   | 0.1927  | 0.99136 | 0.910421 | 1.174134 | 0.18032 | 1.15622 | 0.23457 | 0.965199 | 0.70957 | 1.10427 | 0.395095 |
| 5.06  | 24    | gi 4506633  | 60S ribosomal protein L31 isoform 1 [Homo sapiens]                                               | 3 | 1.23708 | 0.47402 | 0.95535 | 0.724579 | 1.41888  | 0.35286 | 0.98525 | 0.96622 | 1.213987 | 0.63144 | 1.1551  | 0.397981 |
| 2.36  | 4.981 | gi 5453710  | LIM and SH3 domain protein 1 [Homo sapiens]                                                      | 1 | 0.7038  | 0.17472 | 0.74995 | 0.303498 | 0.81862  | 0.29299 | 1.06878 | 0.74451 | 0.721986 | 0.50264 | 0.74921 | 0.401414 |
| 7.5   | 21.59 | gi 4506723  | 40S ribosomal protein S3a isoform 1 [Homo sapiens]                                               | 6 | 1.12182 | 0.58683 | 1.07692 | 0.62046  | 1.139729 | 0.42901 | 1.17579 | 0.43977 | 1.065154 | 0.63398 | 1.10216 | 0.401429 |

|       |       |              |                                                                        |    |         |         |         |          |          |         |         |         |          |         |         |          |
|-------|-------|--------------|------------------------------------------------------------------------|----|---------|---------|---------|----------|----------|---------|---------|---------|----------|---------|---------|----------|
| 25.7  | 38.78 | gi 4506243   | polypyrimidine tract-binding protein 1 isoform a [Homo sapiens]        | 18 | 1.06292 | 0.50756 | 1.06923 | 0.515736 | 1.03194  | 0.7921  | 1.05954 | 0.60728 | 1.071681 | 0.34712 | 1.09726 | 0.405096 |
| 9.37  | 13.6  | gi 4503249   | protein DEK isoform 1 [Homo sapiens]                                   | 6  | 0.90486 | 0.7789  | 0.82548 | 0.362847 | 0.887533 | 0.5517  | 0.78952 | 0.49732 | 0.937237 | 0.82238 | 0.72629 | 0.405633 |
| 14.64 | 25.24 | gi 213511508 | B-cell receptor-associated protein 31 isoform a [Homo sapiens]         | 10 | 0.9788  | 0.86518 | 0.94279 | 0.594634 | 0.912101 | 0.48864 | 1.007   | 0.95315 | 1.037329 | 0.68442 | 0.92084 | 0.409043 |
| 7.42  | 23.37 | gi 219555707 | eukaryotic translation initiation factor 5A-1 isoform A [Homo sapiens] | 12 | 0.93983 | 0.54649 | 0.9442  | 0.764423 | 0.988686 | 0.90673 | 0.86285 | 0.22899 | 0.906192 | 0.37119 | 0.80789 | 0.411159 |
| 1.55  | 4.286 | gi 151101292 | thioredoxin-related transmembrane protein 1 precursor [Homo sapiens]   | 1  | 1.06382 | 0.75255 | 0.97657 | 0.857522 | 0.819195 | 0.30702 | 0.88399 | 0.46597 | 0.94309  | 0.88688 | 0.87165 | 0.412176 |
| 2.73  | 1.905 | gi 65506891  | 4F2 cell-surface antigen heavy chain isoform c [Homo sapiens]          | 1  | 0.98317 | 0.93864 | 0.84624 | 0.244296 | 1.115642 | 0.53319 | 0.93078 | 0.55737 | 1.007492 | 0.96461 | 1.15408 | 0.413802 |
| 6.9   | 12.29 | gi 4504897   | importin subunit alpha-2 [Homo sapiens]                                | 4  | 1.62496 | 0.16839 | 1.58207 | 0.135682 | 1.24339  | 0.36447 | 1.51981 | 0.50696 | 1.039731 | 0.89515 | 1.5101  | 0.415434 |
| 27.47 | 68.18 | gi 226529917 | triosephosphate isomerase isoform 2 [Homo sapiens]                     | 18 | 0.89284 | 0.09459 | 0.9824  | 0.725009 | 1.039563 | 0.50875 | 0.86402 | 0.04131 | 0.996977 | 0.94683 | 1.0504  | 0.4184   |
| 26.12 | 45.92 | gi 10835063  | nucleophosmin isoform 1 [Homo sapiens]                                 | 27 | 1.05093 | 0.20853 | 0.98486 | 0.687201 | 0.932746 | 0.16808 | 1.0139  | 0.77562 | 0.993499 | 0.88674 | 0.96765 | 0.418435 |
| 19.75 | 52.68 | gi 4506667   | 60S acidic ribosomal protein P0 [Homo sapiens]                         | 10 | 1.07767 | 0.28966 | 0.92404 | 0.551593 | 0.973779 | 0.83745 | 1.06728 | 0.4878  | 1.123923 | 0.35376 | 1.08972 | 0.4209   |
| 9.86  | 54.29 | gi 11128019  | cytochrome c [Homo sapiens]                                            | 7  | 1.02581 | 0.90995 | 1.1736  | 0.485643 | 1.168768 | 0.23072 | 1.206   | 0.51323 | 1.136284 | 0.41989 | 1.14466 | 0.422321 |

|       |       |              |                                                                                 |    |         |         |         |          |          |         |         |         |          |         |         |          |
|-------|-------|--------------|---------------------------------------------------------------------------------|----|---------|---------|---------|----------|----------|---------|---------|---------|----------|---------|---------|----------|
| 1.67  | 3.499 | gi 5803181   | stress-induced-phosphoprotein 1 [Homo sapiens]                                  | 1  | 0.71762 | 0.41633 | 0.77017 | 0.230487 | 0.873029 | 0.40131 | 0.75715 | 0.48774 | 0.672277 | 0.46885 | 1.13446 | 0.423418 |
| 6.23  | 5.735 | gi 149999606 | mannosyl-oligosaccharide glucosidase isoform 1 [Homo sapiens]                   | 4  | 1.08059 | 0.53739 | 1.14425 | 0.238759 | 1.1575   | 0.39612 | 1.20626 | 0.22942 | 1.027046 | 0.82377 | 1.22927 | 0.424115 |
| 2.06  | 1.744 | gi 13375618  | delta(24)-sterol reductase precursor [Homo sapiens]                             | 1  | 0.96975 | 0.95351 | 1.02975 | 0.912942 | 0.726643 | 0.58232 | 1.01279 | 0.96941 | 0.809533 | 0.46642 | 0.69083 | 0.428542 |
| 4.59  | 33.59 | gi 6912616   | histone H2A.V isoform 1 [Homo sapiens]                                          | 9  | 0.95702 | 0.75379 | 0.85738 | 0.31234  | 0.799618 | 0.39941 | 0.95914 | 0.85394 | 0.973601 | 0.77491 | 0.91318 | 0.430038 |
| 12.27 | 17.53 | gi 47132620  | keratin, type II cytoskeletal 2 epidermal [Homo sapiens]                        | 10 | 0.94036 | 0.69134 | 1.17098 | 0.215737 | 0.949491 | 0.52853 | 1.22133 | 0.14278 | 1.251278 | 0.05142 | 1.10158 | 0.431077 |
| 29.14 | 48.39 | gi 24119203  | tropomyosin alpha-3 chain isoform 2 [Homo sapiens]                              | 17 | 1.09868 | 0.52294 | 1.13547 | 0.264856 | 1.02411  | 0.77098 | 1.07533 | 0.58977 | 1.025008 | 0.85158 | 1.10599 | 0.4331   |
| 4.54  | 1.504 | gi 7305053   | myoferlin isoform a [Homo sapiens]                                              | 3  | 1.03642 | 0.91549 | 1.07562 | 0.753873 | 0.677725 | 0.15841 | 1.17281 | 0.35344 | 0.804299 | 0.27121 | 0.80158 | 0.434082 |
| 5.17  | 11.54 | gi 71772415  | 40S ribosomal protein S15a [Homo sapiens]                                       | 2  | 1.08261 | 0.30057 | 0.86993 | 0.526937 | 1.005628 | 0.96992 | 1.06918 | 0.64765 | 0.895366 | 0.53786 | 0.9438  | 0.435165 |
| 19.01 | 71.69 | gi 5031635   | cofilin-1 [Homo sapiens]                                                        | 13 | 0.98335 | 0.79485 | 1.06505 | 0.609521 | 1.073792 | 0.50449 | 0.94654 | 0.66373 | 1.006219 | 0.93333 | 1.08085 | 0.437716 |
| 4.87  | 17.72 | gi 5031741   | dnaJ homolog subfamily A member 2 [Homo sapiens]                                | 4  | 1.02126 | 0.95399 | 0.95642 | 0.65181  | 0.777159 | 0.21533 | 1.08462 | 0.83024 | 1.354666 | 0.12297 | 1.18166 | 0.440861 |
| 3.65  | 23.53 | gi 20357529  | guanine nucleotide-binding protein G(I)/G(S)/G(T) subunit beta-2 [Homo sapiens] | 5  | 1.12035 | 0.48505 | 1.20046 | 0.396539 | 1.116905 | 0.28669 | 0.87631 | 0.53161 | 1.27117  | 0.30243 | 1.06684 | 0.441087 |
| 3.09  | 9.509 | gi 38201714  | ELAV-like protein 1 [Homo sapiens]                                              | 3  | 1.41868 | 0.19346 | 1.17549 | 0.435049 | 1.144978 | 0.407   | 1.38872 | 0.18715 | 1.15082  | 0.57414 | 1.18829 | 0.441784 |

|       |       |              |                                                                 |     |         |         |         |          |          |         |         |         |          |         |         |          |
|-------|-------|--------------|-----------------------------------------------------------------|-----|---------|---------|---------|----------|----------|---------|---------|---------|----------|---------|---------|----------|
| 13.12 | 30.82 | gi 148833484 | poly(rC)-binding protein 2 isoform c [Homo sapiens]             | 10  | 0.8692  | 0.5888  | 0.79919 | 0.127357 | 1.023241 | 0.9611  | 0.89854 | 0.74636 | 0.88669  | 0.61133 | 0.80637 | 0.442107 |
| 60.22 | 77.33 | gi 4501887   | actin, cytoplasmic 2 [Homo sapiens]                             | 122 | 1.04669 | 0.76057 | 0.9772  | 0.835104 | 1.156228 | 0.46372 | 1.12886 | 0.57932 | 0.952823 | 0.68722 | 1.13584 | 0.443001 |
| 64.06 | 45.78 | gi 27436946  | lamin isoform A [Homo sapiens]                                  | 33  | 1.00508 | 0.89186 | 0.97829 | 0.718695 | 0.922786 | 0.10936 | 0.99433 | 0.90623 | 0.986285 | 0.69962 | 0.95111 | 0.446249 |
| 4.04  | 20.35 | gi 4502847   | cold-inducible RNA-binding protein [Homo sapiens]               | 4   | 0.77481 | 0.23807 | 0.96341 | 0.8403   | 0.974154 | 0.9343  | 0.84858 | 0.47177 | 0.883339 | 0.43224 | 0.88827 | 0.446678 |
| 2.34  | 40    | gi 15617199  | histone H2A type 3 [Homo sapiens]                               | 42  | 1.09822 | 0.74304 | 0.87151 | 0.415005 | 0.765686 | 0.38284 | 1.16096 | 0.38969 | 1.043543 | 0.75415 | 0.88391 | 0.448851 |
| 1.81  | 6.704 | gi 7706495   | dnaJ homolog subfamily B member 11 precursor [Homo sapiens]     | 2   | 0.93474 | 0.87702 | 0.53691 | 0.101191 | 0.806413 | 0.2753  | 0.5963  | 0.38777 | 0.827227 | 0.3501  | 0.79794 | 0.450096 |
| 6.16  | 25.6  | gi 4506707   | 40S ribosomal protein S25 [Homo sapiens]                        | 4   | 1.05992 | 0.71046 | 0.99801 | 0.984935 | 0.891834 | 0.22233 | 1.00881 | 0.92385 | 1.001775 | 0.9825  | 0.93387 | 0.453378 |
| 24.08 | 31.16 | gi 195972866 | keratin, type I cytoskeletal 10 [Homo sapiens]                  | 18  | 0.99279 | 0.96579 | 1.17686 | 0.25241  | 1.082097 | 0.65185 | 1.1831  | 0.40404 | 1.176889 | 0.26041 | 1.15457 | 0.453813 |
| 1.82  | 8.824 | gi 72534660  | serine/arginine-rich splicing factor 7 isoform 1 [Homo sapiens] | 2   | 1.01438 | 0.96006 | 1.32191 | 0.462731 | 1.03348  | 0.93519 | 0.9051  | 0.57763 | 1.129918 | 0.43756 | 1.25841 | 0.454052 |
| 3.37  | 3.239 | gi 21361282  | serine/arginine-rich splicing factor 4 [Homo sapiens]           | 2   | 0.86496 | 0.58839 | 0.9941  | 0.985146 | 0.989135 | 0.93152 | 0.69451 | 0.50631 | 0.947242 | 0.68143 | 0.83973 | 0.454583 |
| 9.39  | 24.34 | gi 11968182  | 40S ribosomal protein S18 [Homo sapiens]                        | 4   | 0.9108  | 0.17598 | 0.9615  | 0.565209 | 0.836623 | 0.29264 | 0.96303 | 0.84958 | 1.048824 | 0.83849 | 0.92731 | 0.46041  |
| 9.36  | 13.58 | gi 62750354  | matrin-3 isoform a [Homo sapiens]                               | 11  | 1.04516 | 0.83428 | 1.19344 | 0.652837 | 1.008595 | 0.97584 | 0.94902 | 0.77475 | 1.150566 | 0.455   | 1.23023 | 0.463137 |
| 10.86 | 9.359 | gi 71773106  | AP-2 complex subunit beta isoform a [Homo sapiens]              | 6   | 1.03159 | 0.80628 | 0.90953 | 0.514151 | 0.860359 | 0.37066 | 0.88525 | 0.43526 | 0.974676 | 0.93431 | 0.80142 | 0.464299 |

|       |       |              |                                                           |    |         |         |         |          |          |         |         |         |          |         |         |          |
|-------|-------|--------------|-----------------------------------------------------------|----|---------|---------|---------|----------|----------|---------|---------|---------|----------|---------|---------|----------|
| 5.49  | 20.15 | gi 51599151  | calpain small subunit 1 [Homo sapiens]                    | 3  | 1.0993  | 0.90564 | 1.2801  | 0.713734 | 1.693094 | 0.48935 | 1.52327 | 0.58126 | 0.975995 | 0.97003 | 1.2446  | 0.464515 |
| 6.79  | 1.756 | gi 91208426  | pre-mRNA-processing-splicing factor 8 [Homo sapiens]      | 4  | 0.74541 | 0.52013 | 0.93731 | 0.762332 | 0.802356 | 0.39367 | 0.788   | 0.63705 | 0.875564 | 0.80852 | 0.82589 | 0.46519  |
| 2.35  | 8.029 | gi 13904866  | 60S ribosomal protein L28 isoform 2 [Homo sapiens]        | 1  | 1.1852  | 0.61711 | 1.19004 | 0.350877 | 1.095949 | 0.54876 | 1.1129  | 0.49895 | 1.056091 | 0.72529 | 1.26634 | 0.469429 |
| 1.7   | 22.18 | gi 4506663   | 60S ribosomal protein L8 [Homo sapiens]                   | 3  | 1.34108 | 0.1674  | 1.18917 | 0.596438 | 0.934418 | 0.82729 | 1.33352 | 0.31409 | 1.327422 | 0.05463 | 1.3069  | 0.473156 |
| 59.02 | 46.15 | gi 4503483   | elongation factor 2 [Homo sapiens]                        | 39 | 0.94928 | 0.36084 | 1.04053 | 0.380718 | 1.053971 | 0.35544 | 0.9786  | 0.75631 | 0.929768 | 0.18854 | 1.04154 | 0.473738 |
| 4.45  | 4.67  | gi 197276600 | microtubule-associated protein 4 isoform 4 [Homo sapiens] | 4  | 1.27162 | 0.35766 | 1.30783 | 0.138875 | 0.971935 | 0.77141 | 1.24298 | 0.34491 | 1.142233 | 0.44348 | 1.17    | 0.47386  |
| 59.33 | 62.4  | gi 20070125  | protein disulfide-isomerase precursor [Homo sapiens]      | 36 | 0.9796  | 0.56599 | 0.92769 | 0.057465 | 0.928316 | 0.02639 | 0.96119 | 0.35188 | 1.007923 | 0.82127 | 0.97761 | 0.477783 |
| 8.82  | 44.44 | gi 5031749   | non-histone chromosomal protein HMG-17 [Homo sapiens]     | 7  | 1.02829 | 0.76222 | 0.94558 | 0.568522 | 0.847099 | 0.15126 | 0.96638 | 0.60275 | 0.990646 | 0.88526 | 0.95379 | 0.477923 |
| 8.82  | 44.44 | gi 5031749   | non-histone chromosomal protein HMG-17 [Homo sapiens]     | 7  | 1.02829 | 0.76222 | 0.94558 | 0.568522 | 0.847099 | 0.15126 | 0.96638 | 0.60275 | 0.990646 | 0.88526 | 0.95379 | 0.477923 |
| 6.93  | 9.854 | gi 48762932  | T-complex protein 1 subunit theta [Homo sapiens]          | 4  | 0.92715 | 0.48706 | 0.96602 | 0.82075  | 0.929325 | 0.69985 | 0.87594 | 0.5857  | 1.082928 | 0.61024 | 0.86331 | 0.478863 |
| 4.73  | 2.383 | gi 54112121  | splicing factor 3B subunit 3 [Homo sapiens]               | 3  | 0.81032 | 0.48085 | 0.98602 | 0.920135 | 1.05857  | 0.67167 | 0.5949  | 0.49536 | 1.079662 | 0.84245 | 0.89031 | 0.48195  |

|       |       |              |                                                                                                                   |    |         |         |         |          |          |         |         |         |          |         |         |          |
|-------|-------|--------------|-------------------------------------------------------------------------------------------------------------------|----|---------|---------|---------|----------|----------|---------|---------|---------|----------|---------|---------|----------|
| 4.05  | 7.161 | gi 4758756   | nucleosome assembly<br>protein 1-like 1<br>[Homo sapiens]                                                         | 2  | 1.062   | 0.82004 | 1.2756  | 0.571647 | 1.408068 | 0.46674 | 1.48367 | 0.24859 | 1.196134 | 0.33178 | 1.30001 | 0.484108 |
| 16.2  | 62.57 | gi 5453740   | myosin regulatory<br>light chain 12A<br>[Homo sapiens]                                                            | 12 | 1.03618 | 0.53408 | 1.07574 | 0.396769 | 1.10096  | 0.25569 | 1.06196 | 0.4021  | 1.059293 | 0.3758  | 0.9605  | 0.484747 |
| 8.01  | 11.87 | gi 373251164 | glutaminase kidney<br>isoform,<br>mitochondrial<br>isoform 2 [Homo<br>sapiens]                                    | 6  | 0.74804 | 0.21256 | 0.77018 | 0.315563 | 0.807316 | 0.31161 | 0.7773  | 0.4977  | 0.717889 | 0.29766 | 0.84106 | 0.487298 |
| 2.85  | 1.876 | gi 41393608  | reticulon-3 isoform b<br>[Homo sapiens]                                                                           | 2  | 0.80302 | 0.36014 | 0.86762 | 0.389095 | 0.664497 | 0.27998 | 0.77081 | 0.7731  | 0.900955 | 0.48418 | 0.7174  | 0.493207 |
| 2.9   | 8.914 | gi 156564403 | pyruvate<br>dehydrogenase E1<br>component subunit<br>beta, mitochondrial<br>isoform 1 precursor<br>[Homo sapiens] | 2  | 1.45512 | 0.16682 | 1.33691 | 0.487042 | 1.523417 | 0.43403 | 1.45412 | 0.24868 | 1.41206  | 0.69537 | 1.298   | 0.49854  |
| 51.12 | 71.17 | gi 29788785  | tubulin beta chain<br>[Homo sapiens]                                                                              | 51 | 0.90405 | 0.36942 | 0.91409 | 0.416252 | 1.033772 | 0.7416  | 0.9256  | 0.47261 | 0.917076 | 0.43044 | 1.07465 | 0.499031 |
| 8.08  | 8.385 | gi 17402900  | far upstream element-<br>binding protein 1<br>[Homo sapiens]                                                      | 6  | 1.03031 | 0.66506 | 1.10446 | 0.493208 | 0.912083 | 0.35392 | 1.08702 | 0.37794 | 1.001769 | 0.9928  | 1.14004 | 0.499632 |
| 15.54 | 14.91 | gi 5453832   | hypoxia up-regulated<br>protein 1 precursor<br>[Homo sapiens]                                                     | 10 | 1.03014 | 0.81577 | 0.97909 | 0.8833   | 0.952214 | 0.64282 | 0.98593 | 0.92964 | 0.952431 | 0.60746 | 0.87514 | 0.500821 |
| 5.32  | 5.253 | gi 66933016  | inosine-5'-<br>monophosphate<br>dehydrogenase 2<br>[Homo sapiens]                                                 | 4  | 1.03226 | 0.89524 | 1.09494 | 0.50848  | 1.268973 | 0.42403 | 1.3762  | 0.15979 | 1.245079 | 0.48519 | 1.19792 | 0.502222 |

|       |       |              |                                                                                                                   |    |         |         |         |          |          |         |         |         |          |         |         |          |
|-------|-------|--------------|-------------------------------------------------------------------------------------------------------------------|----|---------|---------|---------|----------|----------|---------|---------|---------|----------|---------|---------|----------|
| 2.63  | 5.122 | gi 4504957   | lysosome-associated<br>membrane<br>glycoprotein 2<br>isoform A precursor<br>[Homo sapiens]                        | 2  | 0.54855 | 0.55156 | 1.08974 | 0.849683 | 0.484158 | 0.57545 | 0.37086 | 0.39568 | 0.6991   | 0.54638 | 0.51917 | 0.506245 |
| 4.23  | 31.03 | gi 4826848   | NADH<br>dehydrogenase<br>[ubiquinone] 1 alpha<br>subcomplex subunit 5<br>[Homo sapiens]                           | 2  | 1.46828 | 0.41391 | 1.14203 | 0.815197 | 0.917116 | 0.54645 | 1.22387 | 0.73155 | 1.096227 | 0.88499 | 1.28746 | 0.506837 |
| 6.17  | 6.658 | gi 4503131   | catenin beta-1 [Homo<br>sapiens]                                                                                  | 3  | 0.41141 | 0.15644 | 0.66533 | 0.51162  | 0.503723 | 0.46341 | 0.41106 | 0.25461 | 0.599967 | 0.48447 | 0.41318 | 0.507001 |
| 63.94 | 40.4  | gi 12025678  | alpha-actinin-4<br>[Homo sapiens]                                                                                 | 36 | 0.97761 | 0.81249 | 1.05219 | 0.64193  | 1.086704 | 0.45213 | 1.05716 | 0.61573 | 0.980235 | 0.82704 | 1.07302 | 0.511242 |
| 4.35  | 15.43 | gi 332801090 | heterogeneous<br>nuclear<br>ribonucleoprotein D-<br>like isoform b [Homo<br>sapiens]                              | 6  | 1.00871 | 0.91679 | 1.05032 | 0.446338 | 0.913776 | 0.26441 | 0.98511 | 0.90239 | 1.054689 | 0.41219 | 0.89372 | 0.512474 |
| 74.02 | 44.33 | gi 4507677   | endoplasmic<br>reticulum<br>transmembrane<br>emp24 domain-<br>containing protein 2<br>precursor [Homo<br>sapiens] | 42 | 0.9961  | 0.93353 | 0.94848 | 0.248495 | 0.968327 | 0.51543 | 0.9863  | 0.81623 | 0.976286 | 0.57443 | 0.96779 | 0.512923 |
| 1.57  | 4.478 | gi 5803149   | tubulin beta-4B chain<br>[Homo sapiens]                                                                           | 1  | 1.41839 | 0.40694 | 1.2308  | 0.287656 | 1.26119  | 0.2614  | 1.52491 | 0.1496  | 1.161351 | 0.65161 | 1.39668 | 0.513323 |
| 2.03  | 62.25 | gi 5174735   | PC4 and SFRS1-<br>interacting protein<br>isoform 2 [Homo<br>sapiens]                                              | 42 | 0.85065 | 0.43007 | 0.9246  | 0.575418 | 0.790037 | 0.41365 | 0.90389 | 0.49652 | 1.074749 | 0.66239 | 1.09878 | 0.518424 |
| 11.66 | 16.6  | gi 19923653  | lysosome-associated<br>membrane<br>glycoprotein 2<br>isoform A precursor<br>[Homo sapiens]                        | 8  | 1.17679 | 0.73143 | 1.56402 | 0.358592 | 0.968929 | 0.9434  | 1.46777 | 0.32185 | 1.363601 | 0.25718 | 1.28947 | 0.522585 |

|       |       |              |                                                                                  |    |         |         |         |          |          |         |         |         |          |         |         |          |
|-------|-------|--------------|----------------------------------------------------------------------------------|----|---------|---------|---------|----------|----------|---------|---------|---------|----------|---------|---------|----------|
| 5.85  | 10.4  | gi 60279268  | splicing factor U2AF<br>65 kDa subunit<br>isoform b [Homo<br>sapiens]            | 4  | 1.2201  | 0.66253 | 1.02211 | 0.952784 | 1.130686 | 0.83639 | 0.93141 | 0.83825 | 1.173532 | 0.5247  | 1.13973 | 0.52352  |
| 5.72  | 7.914 | gi 112380628 | lysosome-associated<br>membrane<br>glycoprotein 1<br>precursor [Homo<br>sapiens] | 3  | 0.92406 | 0.43426 | 1.07253 | 0.481096 | 0.862072 | 0.21099 | 0.78483 | 0.09717 | 0.937752 | 0.51208 | 0.78737 | 0.525828 |
| 17.81 | 20.36 | gi 4758138   | probable ATP-<br>dependent RNA<br>helicase DDX5<br>[Homo sapiens]                | 9  | 1.02008 | 0.93999 | 1.03103 | 0.885579 | 1.087795 | 0.60812 | 0.90254 | 0.59855 | 0.900662 | 0.697   | 0.85903 | 0.527072 |
| 2.84  | 15.89 | gi 22208971  | high mobility group<br>protein HMG-I/HMG-<br>Y isoform a [Homo<br>sapiens]       | 2  | 1.16637 | 0.22879 | 1.11889 | 0.314787 | 0.942611 | 0.76233 | 0.96675 | 0.72794 | 1.098282 | 0.38348 | 1.06576 | 0.530562 |
| 2.52  | 2.347 | gi 30581111  | minor<br>histocompatibility<br>antigen H13 isoform<br>3 [Homo sapiens]           | 1  | 0.96889 | 0.88579 | 1.0853  | 0.672652 | 0.932619 | 0.85235 | 0.80742 | 0.27991 | 0.966258 | 0.79095 | 0.57797 | 0.530633 |
| 17.71 | 16.9  | gi 5031755   | heterogeneous<br>nuclear<br>ribonucleoprotein R<br>isoform 2 [Homo<br>sapiens]   | 12 | 1.1786  | 0.36141 | 1.03955 | 0.91766  | 1.411819 | 0.05493 | 1.20407 | 0.33353 | 1.512006 | 0.06272 | 1.34337 | 0.531745 |
| 2.08  | 3.639 | gi 21361361  | acetolactate synthase-<br>like protein [Homo<br>sapiens]                         | 2  | 0.96311 | 0.95496 | 1.11329 | 0.773986 | 1.2958   | 0.74466 | 1.02802 | 0.94228 | 0.89748  | 0.78731 | 1.2972  | 0.533523 |
| 1.75  | 4.592 | gi 4506609   | 60S ribosomal<br>protein L19 [Homo<br>sapiens]                                   | 1  | 1.28745 | 0.58224 | 1.12827 | 0.259487 | 1.136556 | 0.75982 | 1.21129 | 0.29878 | 1.386144 | 0.3114  | 1.23701 | 0.533725 |
| 24.42 | 42.35 | gi 5453539   | multifunctional<br>protein ADE2<br>isoform 2 [Homo<br>sapiens]                   | 14 | 1.00356 | 0.9713  | 1.00013 | 0.998729 | 1.148299 | 0.30568 | 1.09789 | 0.39572 | 0.967332 | 0.82108 | 1.06801 | 0.541305 |

|       |       |              |                                                                                     |    |         |         |         |          |          |         |         |         |          |         |         |          |
|-------|-------|--------------|-------------------------------------------------------------------------------------|----|---------|---------|---------|----------|----------|---------|---------|---------|----------|---------|---------|----------|
| 33.86 | 6.371 | gi 126032350 | DNA-dependent<br>protein kinase<br>catalytic subunit<br>isoform 2 [Homo<br>sapiens] | 22 | 1.20563 | 0.32156 | 1.04779 | 0.533682 | 1.107957 | 0.44994 | 1.05744 | 0.66483 | 1.165061 | 0.4342  | 1.10473 | 0.543078 |
| 6.03  | 17.34 | gi 4502969   | catechol O-<br>methyltransferase<br>isoform MB-COMT<br>[Homo sapiens]               | 4  | 0.93424 | 0.61858 | 0.80864 | 0.279603 | 0.927369 | 0.90939 | 1.13765 | 0.41947 | 0.713404 | 0.1827  | 0.77919 | 0.546947 |
| 7.11  | 29.53 | gi 5031851   | stathmin isoform a<br>[Homo sapiens]                                                | 5  | 1.00604 | 0.96349 | 1.00856 | 0.924299 | 1.159543 | 0.4121  | 0.99103 | 0.96627 | 0.904638 | 0.20568 | 1.16846 | 0.547923 |
| 26.6  | 25.31 | gi 119395750 | keratin, type II<br>cytoskeletal 1 [Homo<br>sapiens]                                | 19 | 0.9346  | 0.43611 | 0.95497 | 0.621952 | 1.108099 | 0.40979 | 1.19886 | 0.10667 | 1.200578 | 0.05109 | 1.04931 | 0.549805 |
| 1.66  | 10.73 | gi 4505641   | proliferating cell<br>nuclear antigen<br>[Homo sapiens]                             | 3  | 0.95874 | 0.74344 | 0.76238 | 0.351143 | 0.672644 | 0.18698 | 0.43342 | 0.07491 | 0.500235 | 0.27736 | 0.56731 | 0.556316 |
| 17.5  | 14.43 | gi 24234750  | interleukin enhancer-<br>binding factor 3<br>isoform a [Homo<br>sapiens]            | 10 | 1.2214  | 0.42885 | 1.08192 | 0.713069 | 1.193625 | 0.35476 | 1.21833 | 0.49341 | 0.91235  | 0.70867 | 1.04385 | 0.557202 |
| 17.62 | 37.67 | gi 4501891   | alpha-actinin-1<br>isoform b [Homo<br>sapiens]                                      | 33 | 1.14984 | 0.38813 | 1.13194 | 0.32002  | 1.205048 | 0.21244 | 1.01236 | 0.92856 | 1.162788 | 0.20884 | 1.08371 | 0.560889 |
| 2.12  | 7.034 | gi 4826734   | RNA-binding protein<br>FUS isoform 1<br>[Homo sapiens]                              | 4  | 0.94968 | 0.70164 | 0.86002 | 0.376919 | 0.888291 | 0.45267 | 0.98973 | 0.93593 | 0.969715 | 0.81381 | 0.92116 | 0.568145 |
| 4.09  | 5.954 | gi 295842307 | splicing factor 1<br>isoform 4 [Homo<br>sapiens]                                    | 3  | 0.94439 | 0.91318 | 1.24603 | 0.673259 | 0.931656 | 0.89132 | 1.241   | 0.722   | 1.023873 | 0.94625 | 1.28342 | 0.570229 |
| 5.48  | 6.397 | gi 311078508 | histone-binding<br>protein RBBP7<br>isoform 1 [Homo<br>sapiens]                     | 3  | 1.10172 | 0.52866 | 0.99141 | 0.969002 | 0.914266 | 0.62674 | 0.9097  | 0.7392  | 1.184806 | 0.19987 | 0.89257 | 0.571518 |
| 9.97  | 6.485 | gi 33620775  | kinectin isoform a<br>[Homo sapiens]                                                | 8  | 1.05966 | 0.69111 | 1.19364 | 0.149146 | 1.159778 | 0.26147 | 0.79517 | 0.22887 | 0.90011  | 0.62253 | 0.90417 | 0.572624 |

|       |       |             |                                                                                 |    |         |         |         |          |          |         |         |         |          |         |         |          |
|-------|-------|-------------|---------------------------------------------------------------------------------|----|---------|---------|---------|----------|----------|---------|---------|---------|----------|---------|---------|----------|
| 2.63  | 1.025 | gi 32967311 | ephrin type-A<br>receptor 2 precursor<br>[Homo sapiens]                         | 1  | 0.9746  | 0.94795 | 1.05692 | 0.85878  | 1.210665 | 0.32138 | 1.1077  | 0.56043 | 1.387491 | 0.37876 | 1.08739 | 0.574518 |
| 40.89 | 35.24 | gi 6005942  | transitional<br>endoplasmic<br>reticulum ATPase<br>[Homo sapiens]               | 25 | 0.97357 | 0.71935 | 0.95857 | 0.555716 | 1.12462  | 0.17086 | 1.01768 | 0.8572  | 0.946802 | 0.38291 | 0.95645 | 0.575353 |
| 6.99  | 21.4  | gi 78000183 | 60S ribosomal<br>protein L14 [Homo<br>sapiens]                                  | 5  | 1.04335 | 0.72706 | 0.99861 | 0.994141 | 0.968287 | 0.89286 | 1.18263 | 0.33665 | 0.920667 | 0.68297 | 0.89227 | 0.575757 |
| 3.51  | 1.903 | gi 4504747  | integrin alpha-3<br>isoform a precursor<br>[Homo sapiens]                       | 2  | 1.226   | 0.2114  | 0.8335  | 0.417073 | 0.827589 | 0.60291 | 1.01131 | 0.98103 | 1.119362 | 0.30086 | 1.06507 | 0.578152 |
| 6.4   | 10.41 | gi 91199540 | dihydrolipoyl<br>dehydrogenase,<br>mitochondrial<br>precursor [Homo<br>sapiens] | 4  | 1.1821  | 0.51111 | 1.02828 | 0.834679 | 1.282727 | 0.58737 | 1.05334 | 0.70556 | 1.129976 | 0.66848 | 1.19902 | 0.58019  |
| 2.25  | 3.558 | gi 25777612 | 26S proteasome non-<br>ATPase regulatory<br>subunit 3 [Homo<br>sapiens]         | 2  | 0.8381  | 0.48744 | 1.10067 | 0.583873 | 1.099142 | 0.73254 | 0.63133 | 0.3464  | 0.970719 | 0.81572 | 0.63441 | 0.581959 |
| 11.11 | 11.62 | gi 48255891 | glucosidase 2 subunit<br>beta isoform 2<br>precursor [Homo<br>sapiens]          | 6  | 1.03946 | 0.67934 | 1.13566 | 0.081367 | 1.012411 | 0.9142  | 1.13026 | 0.29235 | 1.162264 | 0.01179 | 1.05193 | 0.584009 |
| 18.97 | 17.57 | gi 4503841  | X-ray repair cross-<br>complementing<br>protein 6 [Homo<br>sapiens]             | 11 | 0.97292 | 0.81085 | 1.00878 | 0.880034 | 0.998476 | 0.98044 | 0.92188 | 0.2548  | 1.058863 | 0.64942 | 0.9691  | 0.58695  |
| 7.5   | 20.54 | gi 4506455  | reticulocalbin-1<br>precursor [Homo<br>sapiens]                                 | 4  | 0.9615  | 0.61475 | 1.05458 | 0.619085 | 0.942759 | 0.64057 | 1.04202 | 0.67339 | 0.937237 | 0.68695 | 0.92712 | 0.58783  |
| 11.48 | 49.46 | gi 7661678  | ras-related protein<br>Rap-1b isoform 1<br>precursor [Homo<br>sapiens]          | 9  | 1.04781 | 0.8059  | 0.91308 | 0.460369 | 1.104292 | 0.36436 | 1.11936 | 0.62485 | 0.863622 | 0.22512 | 1.13417 | 0.589483 |

|       |       |              |                                                                                     |    |         |         |         |          |          |         |         |         |          |         |         |          |
|-------|-------|--------------|-------------------------------------------------------------------------------------|----|---------|---------|---------|----------|----------|---------|---------|---------|----------|---------|---------|----------|
| 12.36 | 18.53 | gi 57863257  | T-complex protein 1 subunit alpha isoform a [Homo sapiens]                          | 6  | 0.99365 | 0.97173 | 1.10198 | 0.768095 | 0.820472 | 0.46263 | 0.92611 | 0.65421 | 1.094258 | 0.72633 | 1.15002 | 0.592124 |
| 4     | 19.33 | gi 4506697   | 40S ribosomal protein S20 isoform 2 [Homo sapiens]                                  | 2  | 1.16724 | 0.3705  | 1.38228 | 0.267105 | 1.193196 | 0.66439 | 1.42943 | 0.38635 | 1.142585 | 0.66025 | 1.2463  | 0.592284 |
| 2.51  | 5.183 | gi 70995211  | delta(3,5)-Delta(2,4)-dienoyl-CoA isomerase, mitochondrial precursor [Homo sapiens] | 1  | 1.02368 | 0.95347 | 1.20449 | 0.732047 | 0.8886   | 0.71644 | 0.98045 | 0.87509 | 1.373089 | 0.27118 | 1.07641 | 0.594433 |
| 4.25  | 15.23 | gi 68160922  | 40S ribosomal protein S14 [Homo sapiens]                                            | 2  | 0.89167 | 0.72053 | 1.24591 | 0.353475 | 1.058112 | 0.75346 | 1.02913 | 0.93338 | 1.107532 | 0.68517 | 1.16347 | 0.601089 |
| 23.39 | 50    | gi 4758950   | peptidyl-prolyl cis-trans isomerase B precursor [Homo sapiens]                      | 15 | 0.96317 | 0.36944 | 0.91885 | 0.055881 | 0.933665 | 0.26808 | 0.99647 | 0.94972 | 0.960674 | 0.37431 | 0.96843 | 0.603144 |
| 14.36 | 9.423 | gi 154355000 | far upstream element-binding protein 2 [Homo sapiens]                               | 8  | 1.08689 | 0.50836 | 1.05982 | 0.68563  | 0.932229 | 0.61558 | 1.1761  | 0.473   | 1.185571 | 0.19675 | 1.09494 | 0.609018 |
| 3.71  | 14.94 | gi 62244044  | OCIA domain-containing protein 2 isoform 1 [Homo sapiens]                           | 2  | 1.06593 | 0.75131 | 1.07831 | 0.465847 | 0.860725 | 0.46251 | 0.71107 | 0.43904 | 0.881257 | 0.32917 | 0.84963 | 0.609097 |
| 6.07  | 43.44 | gi 4885377   | histone H1.3 [Homo sapiens]                                                         | 14 | 1.04454 | 0.53785 | 0.93529 | 0.437735 | 0.754462 | 0.01216 | 1.21122 | 0.38623 | 1.178831 | 0.3691  | 0.96051 | 0.612951 |
| 6.48  | 19.31 | gi 4506695   | 40S ribosomal protein S19 [Homo sapiens]                                            | 3  | 1.18345 | 0.60921 | 1.09019 | 0.861537 | 0.929737 | 0.8499  | 1.1507  | 0.69475 | 1.276557 | 0.41324 | 1.20276 | 0.61489  |
| 8.68  | 22.49 | gi 354721184 | ras-related protein Rab-5C isoform b [Homo sapiens]                                 | 5  | 0.9894  | 0.89493 | 1.06862 | 0.461529 | 1.002682 | 0.98651 | 0.96801 | 0.8683  | 0.969061 | 0.76529 | 1.08543 | 0.617855 |
| 5.1   | 19.23 | gi 4506743   | 40S ribosomal protein S8 [Homo sapiens]                                             | 7  | 1.17932 | 0.49985 | 1.18919 | 0.299259 | 1.224889 | 0.46026 | 1.20005 | 0.31305 | 1.077038 | 0.79546 | 1.1569  | 0.618747 |

|        |       |              |                                                                              |     |         |         |         |          |          |         |         |         |          |         |         |          |
|--------|-------|--------------|------------------------------------------------------------------------------|-----|---------|---------|---------|----------|----------|---------|---------|---------|----------|---------|---------|----------|
| 11.6   | 25.41 | gi 40254924  | leucine-rich repeat-containing protein 59 [Homo sapiens]                     | 7   | 1.17331 | 0.02623 | 1.05979 | 0.327971 | 0.949168 | 0.65078 | 1.1888  | 0.01927 | 1.124964 | 0.16462 | 1.04358 | 0.620272 |
| 46.54  | 43.1  | gi 4758304   | protein disulfide-isomerase A4 precursor [Homo sapiens]                      | 29  | 0.94767 | 0.13639 | 0.94301 | 0.132998 | 0.926221 | 0.06328 | 0.91517 | 0.09507 | 0.961057 | 0.40127 | 1.02263 | 0.620681 |
| 183.84 | 45.56 | gi 12667788  | myosin-9 [Homo sapiens]                                                      | 131 | 0.98833 | 0.75974 | 0.97703 | 0.492793 | 1.006742 | 0.82829 | 0.98619 | 0.77237 | 0.960691 | 0.2     | 1.01558 | 0.622695 |
| 10.13  | 10.97 | gi 61743954  | neuroblast differentiation-associated protein AHNAK isoform 1 [Homo sapiens] | 12  | 0.96465 | 0.7331  | 1.01859 | 0.841517 | 0.948976 | 0.63379 | 0.99368 | 0.95963 | 1.066503 | 0.5159  | 0.95444 | 0.625648 |
| 4.3    | 8.462 | gi 42734430  | polymerase I and transcript release factor [Homo sapiens]                    | 3   | 0.95085 | 0.86297 | 0.89311 | 0.699758 | 0.803026 | 0.67284 | 0.87765 | 0.59893 | 0.805946 | 0.69619 | 0.89028 | 0.628441 |
| 5.64   | 17.87 | gi 34147513  | ras-related protein Rab-7a [Homo sapiens]                                    | 5   | 0.95351 | 0.73379 | 0.76061 | 0.213252 | 0.854884 | 0.35362 | 0.81528 | 0.41645 | 1.001302 | 0.98901 | 0.94089 | 0.631549 |
| 6.11   | 17.26 | gi 228008400 | heterogeneous nuclear ribonucleoprotein Q isoform 6 [Homo sapiens]           | 14  | 1.21817 | 0.42309 | 1.24361 | 0.309094 | 1.08515  | 0.76039 | 1.27522 | 0.33853 | 1.195927 | 0.2873  | 1.09644 | 0.632009 |
| 11.49  | 35.05 | gi 4506741   | 40S ribosomal protein S7 [Homo sapiens]                                      | 6   | 1.00409 | 0.9778  | 0.96526 | 0.812921 | 0.909794 | 0.66104 | 0.9513  | 0.54511 | 0.966876 | 0.7708  | 0.92787 | 0.634911 |
| 10.18  | 60.5  | gi 4757826   | beta-2-microglobulin precursor [Homo sapiens]                                | 6   | 1.26003 | 0.50144 | 0.8665  | 0.306054 | 1.14102  | 0.77709 | 1.42354 | 0.55364 | 0.945291 | 0.79075 | 0.8252  | 0.638802 |
| 2.1    | 9.813 | gi 223890243 | 60S ribosomal protein L10 isoform a [Homo sapiens]                           | 2   | 1.14824 | 0.20993 | 1.03798 | 0.754032 | 1.268798 | 0.08304 | 1.15213 | 0.28899 | 1.087423 | 0.68281 | 1.04897 | 0.641001 |

|       |        |              |                                                                                  |    |         |         |         |          |          |         |         |         |          |         |         |          |
|-------|--------|--------------|----------------------------------------------------------------------------------|----|---------|---------|---------|----------|----------|---------|---------|---------|----------|---------|---------|----------|
| 16.25 | 45.18  | gi 153070260 | myristoylated alanine-rich C-kinase substrate [Homo sapiens]                     | 9  | 0.983   | 0.80578 | 0.9737  | 0.694966 | 0.988063 | 0.84891 | 0.99415 | 0.92598 | 0.997562 | 0.96911 | 1.03013 | 0.641041 |
| 34.42 | 55.7   | gi 156071459 | ADP/ATP translocase 2 [Homo sapiens]                                             | 29 | 1.03376 | 0.68358 | 0.9262  | 0.376592 | 0.988751 | 0.95299 | 0.97673 | 0.78837 | 0.96945  | 0.77703 | 0.9515  | 0.641079 |
| 2.17  | 0.4867 | gi 54607053  | translational activator GCN1 [Homo sapiens]                                      | 1  | 1.28676 | 0.24123 | 1.07193 | 0.906543 | 0.741843 | 0.68752 | 0.71728 | 0.66122 | 1.331493 | 0.53099 | 0.83414 | 0.644476 |
| 2.39  | 5.917  | gi 4502981   | cytochrome c oxidase subunit 4 isoform 1, mitochondrial precursor [Homo sapiens] | 1  | 0.86484 | 0.25424 | 0.99029 | 0.964486 | 1.020714 | 0.83282 | 0.8429  | 0.23318 | 1.026772 | 0.81804 | 1.0846  | 0.645195 |
| 1.43  | 0.9151 | gi 29826341  | calmodulin-binding transcription activator 2 isoform 1 [Homo sapiens]            | 2  | 1.02264 | 0.97348 | 1.1667  | 0.370435 | 1.013866 | 0.97412 | 1.00199 | 0.99841 | 0.997553 | 0.99617 | 0.82669 | 0.646072 |
| 18    | 89.63  | gi 4504981   | galectin-1 [Homo sapiens]                                                        | 13 | 0.94609 | 0.56748 | 1.06686 | 0.337019 | 0.998775 | 0.99189 | 0.98275 | 0.86625 | 0.982519 | 0.85361 | 0.96945 | 0.646657 |
| 30.18 | 31.63  | gi 34932414  | non-POU domain-containing octamer-binding protein isoform 1 [Homo sapiens]       | 18 | 1.02179 | 0.71872 | 0.95014 | 0.56712  | 0.987357 | 0.85793 | 1.00228 | 0.97442 | 0.979062 | 0.76057 | 0.95323 | 0.661185 |
| 20.86 | 21.51  | gi 18201905  | glucose-6-phosphate isomerase isoform 2 [Homo sapiens]                           | 14 | 0.8891  | 0.11886 | 0.99188 | 0.914596 | 1.007987 | 0.93038 | 0.92749 | 0.67746 | 1.005971 | 0.94939 | 1.03989 | 0.662333 |
| 1.69  | 10.67  | gi 4758040   | cytochrome c oxidase subunit 6C proprotein [Homo sapiens]                        | 2  | 0.85609 | 0.37626 | 1.19072 | 0.565045 | 0.999303 | 0.99786 | 1.33632 | 0.67643 | 1.130728 | 0.64572 | 1.06285 | 0.662841 |
| 6.13  | 6.647  | gi 87196351  | ATP-dependent RNA helicase DDX3X isoform 1 [Homo sapiens]                        | 3  | 1.18019 | 0.51813 | 1.21877 | 0.602725 | 0.919683 | 0.75389 | 0.73428 | 0.20041 | 1.18035  | 0.41588 | 1.05972 | 0.665489 |

|       |       |              |                                                                                                       |    |         |         |         |          |          |         |         |         |          |         |         |          |
|-------|-------|--------------|-------------------------------------------------------------------------------------------------------|----|---------|---------|---------|----------|----------|---------|---------|---------|----------|---------|---------|----------|
| 37.8  | 58.07 | gi 14043072  | heterogeneous<br>nuclear<br>ribonucleoproteins<br>A2/B1 isoform B1<br>[Homo sapiens]<br>40S ribosomal | 24 | 0.99729 | 0.99214 | 0.89746 | 0.632954 | 0.951845 | 0.82147 | 1.04794 | 0.90827 | 0.952007 | 0.78644 | 0.91491 | 0.666499 |
| 9.87  | 15.36 | gi 15055539  | protein S2 [Homo<br>sapiens]<br>60S ribosomal                                                         | 4  | 0.98191 | 0.94926 | 1.00864 | 0.979743 | 0.878588 | 0.57863 | 1.02254 | 0.91929 | 0.956993 | 0.88491 | 1.1123  | 0.670417 |
| 4.67  | 11.41 | gi 4506649   | protein L3 isoform a<br>[Homo sapiens]<br>NAD(P)                                                      | 3  | 0.86881 | 0.71238 | 0.92019 | 0.286429 | 0.938384 | 0.8218  | 0.99791 | 0.9954  | 0.829736 | 0.47181 | 0.90558 | 0.673162 |
| 3.95  | 2.855 | gi 122939155 | transhydrogenase,<br>mitochondrial [Homo<br>sapiens]                                                  | 3  | 1.00797 | 0.94948 | 1.13779 | 0.597416 | 1.143784 | 0.49699 | 0.8888  | 0.4475  | 0.881076 | 0.48103 | 1.13072 | 0.673925 |
| 11.05 | 29.93 | gi 63252900  | tropomyosin alpha-1<br>chain isoform 4<br>[Homo sapiens]<br>splicing factor,                          | 10 | 1.08825 | 0.37639 | 1.04674 | 0.732007 | 1.130557 | 0.28152 | 1.16461 | 0.14713 | 0.981288 | 0.89392 | 1.04555 | 0.674296 |
| 22.02 | 20.65 | gi 4826998   | proline- and<br>glutamine-rich<br>[Homo sapiens]<br>cytochrome c oxidase                              | 19 | 0.97461 | 0.91414 | 1.03224 | 0.88877  | 0.887348 | 0.62919 | 0.97859 | 0.93981 | 1.022428 | 0.92594 | 0.90595 | 0.674537 |
| 4.58  | 17.62 | gi 251831110 | subunit II [Homo<br>sapiens]<br>60S ribosomal                                                         | 3  | 0.80403 | 0.69103 | 0.86297 | 0.299261 | 0.722846 | 0.28015 | 0.6475  | 0.10402 | 0.866816 | 0.66375 | 0.91801 | 0.675132 |
| 6.22  | 19.68 | gi 4506607   | protein L18 isoform 1<br>[Homo sapiens]<br>10 kDa heat shock                                          | 3  | 0.96035 | 0.7603  | 0.87805 | 0.465616 | 0.962498 | 0.839   | 0.88382 | 0.53872 | 1.032148 | 0.81521 | 0.89035 | 0.675519 |
| 16.23 | 74.51 | gi 4504523   | protein,<br>mitochondrial [Homo<br>sapiens]<br>60S ribosomal                                          | 8  | 0.99268 | 0.88544 | 0.97341 | 0.600927 | 0.974775 | 0.61892 | 0.97012 | 0.56798 | 0.974523 | 0.6162  | 1.02344 | 0.675919 |
| 9.51  | 19.44 | gi 67189747  | protein L6 [Homo<br>sapiens]<br>60S ribosomal                                                         | 5  | 1.02062 | 0.76923 | 0.84308 | 0.303084 | 1.054461 | 0.51107 | 1.04638 | 0.62651 | 0.978707 | 0.85244 | 0.95504 | 0.677122 |
| 7.3   | 29.17 | gi 67944630  | protein L9 [Homo<br>sapiens]                                                                          | 5  | 1.15467 | 0.38103 | 1.15642 | 0.137453 | 1.229212 | 0.2788  | 0.96642 | 0.85104 | 1.288677 | 0.12373 | 0.93631 | 0.677782 |

|       |       |              |                                                                              |    |         |         |         |          |          |         |         |         |          |         |         |          |
|-------|-------|--------------|------------------------------------------------------------------------------|----|---------|---------|---------|----------|----------|---------|---------|---------|----------|---------|---------|----------|
| 2.18  | 2.71  | gi 19923193  | hsc70-interacting protein [Homo sapiens]                                     | 1  | 0.95037 | 0.83989 | 0.96798 | 0.821141 | 0.800799 | 0.76442 | 1.21002 | 0.30454 | 0.833078 | 0.31592 | 0.84992 | 0.678324 |
| 13.2  | 29.47 | gi 55956921  | heterogeneous nuclear ribonucleoprotein A/B isoform b [Homo sapiens]         | 9  | 1.0958  | 0.21875 | 0.95419 | 0.514181 | 0.998728 | 0.98187 | 1.06164 | 0.42607 | 1.077823 | 0.36657 | 1.03855 | 0.682577 |
| 4.49  | 15.75 | gi 217330646 | activated RNA polymerase II transcriptional coactivator p15 [Homo sapiens]   | 2  | 1.00545 | 0.95064 | 0.93514 | 0.513028 | 0.866581 | 0.5256  | 0.9196  | 0.27018 | 0.941666 | 0.70261 | 0.93123 | 0.689454 |
| 7.02  | 12.25 | gi 10835067  | lupus La protein [Homo sapiens]                                              | 4  | 0.89702 | 0.81509 | 1.02335 | 0.970048 | 0.912524 | 0.7839  | 0.7299  | 0.73114 | 0.740666 | 0.69847 | 0.84575 | 0.690483 |
| 4.6   | 48.99 | gi 156071462 | ADP/ATP translocase 3 [Homo sapiens]                                         | 27 | 1.12804 | 0.72644 | 1.12233 | 0.745559 | 1.261938 | 0.52519 | 1.17129 | 0.68662 | 1.088808 | 0.69381 | 1.11963 | 0.691645 |
| 4.14  | 16.17 | gi 39725636  | transmembrane emp24 domain-containing protein 9 precursor [Homo sapiens]     | 3  | 1.09319 | 0.53296 | 1.04374 | 0.761259 | 1.333761 | 0.26105 | 0.73663 | 0.19907 | 0.970606 | 0.87339 | 1.08416 | 0.691946 |
| 4.38  | 12.82 | gi 16117789  | 60S ribosomal protein L34 [Homo sapiens]                                     | 2  | 0.87852 | 0.5603  | 0.88838 | 0.470693 | 0.772053 | 0.45763 | 0.59708 | 0.13049 | 0.960721 | 0.77356 | 0.75407 | 0.692607 |
| 28.84 | 30.2  | gi 50345984  | ATP synthase subunit alpha, mitochondrial isoform a precursor [Homo sapiens] | 21 | 0.95209 | 0.43118 | 0.97584 | 0.817633 | 0.944751 | 0.56027 | 0.99797 | 0.98171 | 0.942627 | 0.43909 | 1.03342 | 0.693136 |
| 20.15 | 55.88 | gi 4504297   | histone H3.1 [Homo sapiens]                                                  | 20 | 1.11344 | 0.49506 | 0.89675 | 0.505913 | 0.998635 | 0.99393 | 1.19646 | 0.59173 | 0.925642 | 0.59705 | 0.94698 | 0.696575 |
| 19.47 | 39.46 | gi 221307584 | prohibitin-2 isoform 1 [Homo sapiens]                                        | 14 | 1.03343 | 0.73666 | 0.93609 | 0.6425   | 0.962379 | 0.72427 | 0.95351 | 0.83651 | 0.943864 | 0.59801 | 1.0389  | 0.697615 |
| 18.66 | 33.42 | gi 93141020  | core histone macro-H2A.1 isoform 2 [Homo sapiens]                            | 12 | 1.03657 | 0.80111 | 0.98151 | 0.885185 | 1.032144 | 0.80074 | 0.93467 | 0.77516 | 1.039574 | 0.78897 | 0.94747 | 0.698714 |

|       |       |             |                                                                                                              |    |         |         |         |          |          |         |         |         |          |         |         |          |
|-------|-------|-------------|--------------------------------------------------------------------------------------------------------------|----|---------|---------|---------|----------|----------|---------|---------|---------|----------|---------|---------|----------|
| 8.92  | 17.45 | gi 47132595 | phosphate carrier protein, mitochondrial isoform b precursor [Homo sapiens] cytochrome c oxidase subunit 5B, | 5  | 1.06729 | 0.32103 | 0.95402 | 0.461468 | 1.101687 | 0.16278 | 0.99838 | 0.98638 | 1.049733 | 0.44725 | 1.04113 | 0.699173 |
| 6.19  | 27.91 | gi 17017988 | mitochondrial precursor [Homo sapiens] CD44 antigen                                                          | 4  | 1.01292 | 0.91838 | 1.27302 | 0.344714 | 0.87403  | 0.55306 | 0.53226 | 0.34154 | 1.014991 | 0.92652 | 0.92066 | 0.701532 |
| 16.02 | 11.59 | gi 48255935 | isoform 1 precursor [Homo sapiens]                                                                           | 9  | 0.99745 | 0.96815 | 1.05606 | 0.470139 | 0.974859 | 0.77069 | 1.02163 | 0.80288 | 0.952887 | 0.7142  | 0.95638 | 0.702046 |
| 6.26  | 41.78 | gi 83376130 | elongation factor 1-beta [Homo sapiens]                                                                      | 5  | 1.06939 | 0.52176 | 0.99888 | 0.998173 | 1.26491  | 0.11474 | 1.26122 | 0.61166 | 1.299958 | 0.42094 | 1.17718 | 0.702982 |
| 24.64 | 16.54 | gi 23510340 | ubiquitin-like modifier-activating enzyme 1 [Homo sapiens]                                                   | 17 | 0.86945 | 0.13185 | 0.89243 | 0.154395 | 1.047217 | 0.59847 | 0.8588  | 0.06201 | 0.98632  | 0.84641 | 1.03481 | 0.70466  |
| 2.08  | 13.04 | gi 5453559  | ATP synthase subunit d, mitochondrial isoform a [Homo sapiens]                                               | 1  | 1.54649 | 0.1424  | 1.23522 | 0.663545 | 1.086338 | 0.55674 | 1.28814 | 0.2495  | 1.425763 | 0.40471 | 1.21003 | 0.705296 |
| 12.34 | 2.626 | gi 41322916 | plectin isoform 1 [Homo sapiens] heterogeneous nuclear                                                       | 10 | 0.95217 | 0.8024  | 1.34488 | 0.401625 | 1.034696 | 0.93365 | 1.19649 | 0.63772 | 1.423922 | 0.15327 | 1.12662 | 0.707928 |
| 16.48 | 32.53 | gi 14043070 | ribonucleoprotein A1 isoform b [Homo sapiens]                                                                | 23 | 1.05591 | 0.75886 | 0.96459 | 0.690319 | 1.149365 | 0.41417 | 1.20924 | 0.58318 | 1.019104 | 0.89852 | 1.07093 | 0.708404 |
| 4.16  | 12.32 | gi 6912634  | 60S ribosomal protein L13a isoform 1 [Homo sapiens]                                                          | 3  | 0.95479 | 0.81055 | 0.87337 | 0.259546 | 1.140071 | 0.34559 | 0.89491 | 0.55672 | 1.120049 | 0.45983 | 0.95566 | 0.711813 |
| 10.8  | 26.28 | gi 21614499 | ezrin [Homo sapiens]                                                                                         | 15 | 1.06182 | 0.49832 | 1.05333 | 0.555483 | 1.307711 | 0.03294 | 0.94707 | 0.71822 | 1.133167 | 0.4463  | 0.89818 | 0.712349 |

|       |       |              |                                                                                                                    |    |         |         |         |          |          |         |         |         |          |         |         |          |
|-------|-------|--------------|--------------------------------------------------------------------------------------------------------------------|----|---------|---------|---------|----------|----------|---------|---------|---------|----------|---------|---------|----------|
| 24.74 | 21.58 | gi 4506675   | dolichyl-<br>diphosphooligosacch<br>aride--protein<br>glycosyltransferase<br>subunit 1 precursor<br>[Homo sapiens] | 12 | 1.05826 | 0.57928 | 0.982   | 0.858546 | 0.991824 | 0.94215 | 1.03226 | 0.81042 | 0.962578 | 0.72136 | 1.03882 | 0.713397 |
| 7.75  | 14.9  | gi 19743875  | fumarate hydratase,<br>mitochondrial [Homo<br>sapiens]                                                             | 5  | 1.23102 | 0.54474 | 0.98192 | 0.924664 | 1.139205 | 0.30063 | 0.85337 | 0.73457 | 1.058899 | 0.90011 | 1.1213  | 0.713871 |
| 5.8   | 15.3  | gi 52630342  | HLA class I<br>histocompatibility<br>antigen, Cw-1 alpha<br>chain precursor<br>[Homo sapiens]                      | 6  | 0.97171 | 0.88809 | 1.02558 | 0.936087 | 1.027002 | 0.79844 | 0.88162 | 0.32984 | 0.853302 | 0.58819 | 0.90592 | 0.715453 |
| 20.77 | 65.58 | gi 380837121 | vesicle-trafficking<br>protein SEC22b<br>precursor [Homo<br>sapiens]                                               | 20 | 1.10024 | 0.05719 | 1.03229 | 0.495044 | 1.038818 | 0.5283  | 1.06556 | 0.32572 | 0.996953 | 0.97062 | 1.03531 | 0.723297 |
| 4.52  | 5.752 | gi 394025723 | very long-chain<br>specific acyl-CoA<br>dehydrogenase,<br>mitochondrial<br>isoform 3 [Homo<br>sapiens]             | 3  | 0.74699 | 0.59182 | 0.76043 | 0.55318  | 0.988837 | 0.95255 | 0.65897 | 0.26758 | 0.911972 | 0.79251 | 0.72594 | 0.725427 |
| 10.1  | 22.11 | gi 42476281  | voltage-dependent<br>anion-selective<br>channel protein 2<br>isoform 2 [Homo<br>sapiens]                           | 7  | 0.98794 | 0.90701 | 0.94137 | 0.558142 | 0.967298 | 0.81086 | 1.19774 | 0.20741 | 0.999744 | 0.998   | 0.97538 | 0.726116 |
| 4.15  | 7.612 | gi 21536286  | creatine kinase B-<br>type [Homo sapiens]                                                                          | 2  | 0.93056 | 0.85493 | 0.75114 | 0.745502 | 0.851942 | 0.75556 | 0.70757 | 0.23455 | 0.726465 | 0.72965 | 0.86017 | 0.728049 |
| 9.25  | 22.58 | gi 15431288  | 60S ribosomal<br>protein L10a [Homo<br>sapiens]                                                                    | 5  | 1.13923 | 0.20613 | 1.19379 | 0.097845 | 1.405531 | 0.07869 | 1.30502 | 0.03712 | 1.272751 | 0.04776 | 1.06428 | 0.731592 |

|       |       |              |                                                                                        |    |         |         |         |          |          |         |         |         |          |         |         |          |
|-------|-------|--------------|----------------------------------------------------------------------------------------|----|---------|---------|---------|----------|----------|---------|---------|---------|----------|---------|---------|----------|
| 4.26  | 6.093 | gi 4885281   | glutamate<br>dehydrogenase 1,<br>mitochondrial<br>precursor [Homo<br>sapiens]          | 3  | 1.03466 | 0.82658 | 1.31687 | 0.384031 | 0.988878 | 0.95217 | 1.03104 | 0.84229 | 0.9713   | 0.90753 | 1.04757 | 0.734971 |
| 18.88 | 39.92 | gi 378548190 | 40S ribosomal<br>protein S3 isoform 1<br>[Homo sapiens]                                | 10 | 1.05379 | 0.67765 | 0.90108 | 0.325676 | 0.998495 | 0.98928 | 0.95251 | 0.73441 | 1.080897 | 0.54587 | 1.05154 | 0.736446 |
| 8.52  | 28.89 | gi 4502205   | ADP-ribosylation<br>factor 4 [Homo<br>sapiens]                                         | 5  | 1.12509 | 0.85061 | 0.88053 | 0.643544 | 1.213056 | 0.76438 | 0.7777  | 0.57084 | 0.860941 | 0.67797 | 0.83245 | 0.740092 |
| 12.97 | 11.04 | gi 52632383  | heterogeneous<br>nuclear<br>ribonucleoprotein L<br>isoform a [Homo<br>sapiens]         | 6  | 1.1947  | 0.19772 | 1.03175 | 0.790467 | 1.158331 | 0.37641 | 1.06595 | 0.63342 | 0.987748 | 0.89712 | 1.04132 | 0.742688 |
| 3.73  | 10.65 | gi 321117084 | RPS10-NUDT3<br>protein [Homo<br>sapiens]                                               | 3  | 1.01139 | 0.94355 | 1.0143  | 0.970992 | 0.922407 | 0.5861  | 1.00405 | 0.96666 | 1.059227 | 0.64926 | 0.96851 | 0.743459 |
| 7.8   | 50.71 | gi 4506605   | 60S ribosomal<br>protein L23 [Homo<br>sapiens]                                         | 5  | 0.87865 | 0.74322 | 0.95354 | 0.771566 | 0.815871 | 0.53752 | 1.04347 | 0.881   | 0.760368 | 0.11783 | 0.92817 | 0.750798 |
| 3.98  | 18.67 | gi 190885499 | cytochrome c oxidase<br>subunit 5A,<br>mitochondrial<br>precursor [Homo<br>sapiens]    | 3  | 1.04812 | 0.65287 | 1.12766 | 0.567805 | 0.993509 | 0.97116 | 0.77747 | 0.09934 | 1.026415 | 0.78893 | 1.04016 | 0.752238 |
| 1.35  | 27.27 | gi 194688135 | high mobility group<br>protein B2 [Homo<br>sapiens]                                    | 7  | 1.06464 | 0.85993 | 1.01726 | 0.972515 | 1.015592 | 0.97689 | 1.02219 | 0.96616 | 0.999257 | 0.99421 | 0.91965 | 0.760339 |
| 7.61  | 21.92 | gi 98986464  | transmembrane<br>emp24 domain-<br>containing protein 10<br>precursor [Homo<br>sapiens] | 6  | 0.88786 | 0.72101 | 0.78503 | 0.248243 | 0.818962 | 0.61315 | 0.91388 | 0.79432 | 0.896156 | 0.53912 | 0.92621 | 0.763469 |
| 9.7   | 4.637 | gi 19913406  | DNA topoisomerase<br>2-alpha [Homo<br>sapiens]                                         | 7  | 1.19997 | 0.81665 | 1.39591 | 0.184234 | 1.329365 | 0.30032 | 1.49119 | 0.45954 | 1.127594 | 0.8554  | 1.14999 | 0.764389 |

|       |       |              |                                                                                           |    |         |         |         |          |          |         |         |         |          |         |         |          |
|-------|-------|--------------|-------------------------------------------------------------------------------------------|----|---------|---------|---------|----------|----------|---------|---------|---------|----------|---------|---------|----------|
| 5.87  | 19.02 | gi 5803036   | heterogeneous<br>nuclear<br>ribonucleoprotein A0<br>[Homo sapiens]                        | 5  | 1.05968 | 0.83796 | 0.97227 | 0.854566 | 1.114078 | 0.49743 | 1.07709 | 0.79112 | 1.012741 | 0.96513 | 1.05259 | 0.765253 |
| 19.03 | 48.66 | gi 4758638   | peroxiredoxin-6<br>[Homo sapiens]                                                         | 9  | 0.96744 | 0.76701 | 1.1843  | 0.204936 | 1.193197 | 0.07085 | 0.98306 | 0.94703 | 1.00903  | 0.97102 | 1.07972 | 0.767286 |
| 9.78  | 10.43 | gi 4502285   | sarcoplasmic/endopla<br>smic reticulum<br>calcium ATPase 2<br>isoform a [Homo<br>sapiens] | 7  | 1.10151 | 0.66208 | 1.04782 | 0.815902 | 1.335057 | 0.31594 | 1.0606  | 0.84338 | 1.01103  | 0.93739 | 1.06943 | 0.767545 |
| 10.29 | 26.43 | gi 73760405  | thymopoietin isoform<br>beta [Homo sapiens]                                               | 7  | 1.05181 | 0.61144 | 1.12399 | 0.350742 | 0.91077  | 0.54197 | 0.84554 | 0.35827 | 0.975897 | 0.80234 | 0.96391 | 0.768285 |
| 8.66  | 73.91 | gi 4506671   | 60S acidic ribosomal<br>protein P2 [Homo<br>sapiens]                                      | 7  | 1.08556 | 0.34581 | 1.0435  | 0.605096 | 1.058493 | 0.49566 | 1.11581 | 0.23312 | 1.056699 | 0.50924 | 1.0239  | 0.768286 |
| 5.06  | 12.77 | gi 163644321 | cytochrome b-c1<br>complex subunit<br>Rieske, mitochondrial<br>[Homo sapiens]             | 3  | 0.75455 | 0.71922 | 0.57239 | 0.407115 | 0.771567 | 0.45298 | 0.86607 | 0.39779 | 0.948623 | 0.69406 | 0.84441 | 0.772512 |
| 4.75  | 14.44 | gi 311771647 | actin-related protein<br>2/3 complex subunit<br>4 isoform c [Homo<br>sapiens]             | 2  | 1.08265 | 0.87616 | 0.96313 | 0.925078 | 1.106502 | 0.78565 | 0.72989 | 0.67988 | 0.828008 | 0.34231 | 1.1508  | 0.773513 |
| 62.88 | 65.79 | gi 41399285  | 60 kDa heat shock<br>protein,<br>mitochondrial [Homo<br>sapiens]                          | 57 | 1.00869 | 0.83404 | 1.0126  | 0.787426 | 1.000185 | 0.99618 | 0.99905 | 0.9821  | 0.998881 | 0.96892 | 1.00977 | 0.773751 |
| 20.62 | 36.93 | gi 14110414  | heterogeneous<br>nuclear<br>ribonucleoprotein D0<br>isoform c [Homo<br>sapiens]           | 11 | 0.99292 | 0.95083 | 0.93943 | 0.765849 | 0.999996 | 1       | 0.90384 | 0.55038 | 0.911699 | 0.637   | 0.96899 | 0.774905 |
| 6.7   | 31.82 | gi 14277700  | 40S ribosomal<br>protein S12 [Homo<br>sapiens]                                            | 5  | 1.01814 | 0.89192 | 0.83278 | 0.636779 | 1.036141 | 0.79088 | 1.09946 | 0.53195 | 0.947092 | 0.70597 | 1.03925 | 0.774943 |

|      |       |              |                                                                                                        |   |         |         |         |          |          |         |         |         |          |         |         |          |
|------|-------|--------------|--------------------------------------------------------------------------------------------------------|---|---------|---------|---------|----------|----------|---------|---------|---------|----------|---------|---------|----------|
| 8.55 | 43.03 | gi 4506597   | 60S ribosomal protein L12 [Homo sapiens]                                                               | 5 | 1.12104 | 0.41768 | 0.99867 | 0.991624 | 1.142792 | 0.27762 | 1.15111 | 0.36571 | 1.168818 | 0.22156 | 0.97404 | 0.775656 |
| 2.14 | 1.183 | gi 69354671  | ATP-binding cassette sub-family F member 1 isoform a [Homo sapiens]                                    | 1 | 0.97085 | 0.91323 | 1.37039 | 0.194106 | 1.471155 | 0.16004 | 0.99946 | 0.99909 | 1.19076  | 0.84283 | 0.88838 | 0.777605 |
| 8.3  | 15.77 | gi 38455427  | T-complex protein 1 subunit delta isoform a [Homo sapiens]                                             | 9 | 1.00106 | 0.99697 | 0.9324  | 0.78378  | 0.94696  | 0.89777 | 0.73934 | 0.19109 | 0.953969 | 0.86496 | 0.88244 | 0.781297 |
| 3.55 | 3.568 | gi 25777600  | 26S proteasome non-ATPase regulatory subunit 1 isoform 1 [Homo sapiens]                                | 2 | 0.5996  | 0.2571  | 0.72519 | 0.44323  | 0.696634 | 0.17297 | 0.78612 | 0.64533 | 0.951232 | 0.78597 | 0.90594 | 0.783538 |
| 11.9 | 37.56 | gi 4758988   | ras-related protein Rab-1A isoform 1 [Homo sapiens]                                                    | 6 | 0.99181 | 0.96521 | 0.92253 | 0.748232 | 0.935789 | 0.76268 | 0.90523 | 0.4775  | 0.908909 | 0.59598 | 0.95635 | 0.786256 |
| 3.24 | 16.67 | gi 7706244   | protein CutA isoform 2 precursor [Homo sapiens]                                                        | 2 | 0.67103 | 0.589   | 1.19653 | 0.60623  | 1.002143 | 0.99217 | 0.80534 | 0.65969 | 0.637288 | 0.47229 | 0.87021 | 0.787415 |
| 2.13 | 1.915 | gi 338827685 | AP-2 complex subunit alpha-2 isoform 1 [Homo sapiens]                                                  | 2 | 0.71448 | 0.18213 | 1.31353 | 0.221365 | 1.383797 | 0.18813 | 0.99862 | 0.9911  | 0.962428 | 0.76468 | 0.92112 | 0.789026 |
| 9.74 | 10.09 | gi 20070197  | dolichyl-diphosphooligosaccharide--protein glycosyltransferase 48 kDa subunit precursor [Homo sapiens] | 4 | 1.04981 | 0.70743 | 0.9536  | 0.607867 | 1.072354 | 0.48364 | 1.0482  | 0.65371 | 1.145003 | 0.10928 | 0.95791 | 0.795514 |
| 5.68 | 1.27  | gi 114155142 | nucleoprotein TPR [Homo sapiens]                                                                       | 3 | 0.95437 | 0.71923 | 1.55827 | 0.139745 | 1.144505 | 0.69242 | 1.20935 | 0.80201 | 1.199909 | 0.83418 | 1.21081 | 0.797233 |
| 6.36 | 5.361 | gi 42544159  | heat shock protein 105 kDa [Homo sapiens]                                                              | 5 | 1.03791 | 0.83751 | 0.71001 | 0.495345 | 0.921183 | 0.61123 | 0.87039 | 0.52533 | 0.997984 | 0.98476 | 0.95339 | 0.800479 |

|       |       |             |                                                                                               |    |         |         |         |          |          |         |         |         |          |         |         |          |
|-------|-------|-------------|-----------------------------------------------------------------------------------------------|----|---------|---------|---------|----------|----------|---------|---------|---------|----------|---------|---------|----------|
| 11.37 | 31.56 | gi 4502491  | complement component 1 Q subcomponent-binding protein, mitochondrial precursor [Homo sapiens] | 9  | 1.00508 | 0.9556  | 1.08064 | 0.456452 | 1.010557 | 0.92983 | 1.20337 | 0.33467 | 1.019807 | 0.90324 | 0.91517 | 0.802382 |
| 5.75  | 7.296 | gi 21361368 | delta-1-pyrroline-5-carboxylate synthase isoform 1 [Homo sapiens]                             | 3  | 0.9781  | 0.9669  | 0.85497 | 0.50659  | 0.897332 | 0.73533 | 0.78013 | 0.6573  | 0.641257 | 0.47964 | 1.06857 | 0.80268  |
| 6.4   | 18.54 | gi 4506685  | 40S ribosomal protein S13 [Homo sapiens]                                                      | 3  | 0.99031 | 0.93996 | 0.84468 | 0.333348 | 1.051426 | 0.71728 | 0.7756  | 0.29608 | 0.912275 | 0.4263  | 0.97195 | 0.802778 |
| 14.95 | 30.7  | gi 4502923  | calponin-3 [Homo sapiens]                                                                     | 15 | 1.02544 | 0.70414 | 1.05062 | 0.341917 | 0.941943 | 0.35536 | 0.95816 | 0.58435 | 1.044902 | 0.49742 | 1.01242 | 0.806483 |
| 8.48  | 9.269 | gi 29029559 | exportin-2 isoform 1 [Homo sapiens]                                                           | 5  | 1.09982 | 0.8148  | 0.8955  | 0.765058 | 1.387637 | 0.56142 | 0.88907 | 0.77044 | 0.874732 | 0.85614 | 1.12938 | 0.809937 |
| 8.48  | 9.269 | gi 29029559 | exportin-2 isoform 1 [Homo sapiens]                                                           | 5  | 1.09982 | 0.8148  | 0.8955  | 0.765058 | 1.387637 | 0.56142 | 0.88907 | 0.77044 | 0.874732 | 0.85614 | 1.12938 | 0.809937 |
| 14.77 | 50.49 | gi 77539758 | histone H4 [Homo sapiens]                                                                     | 28 | 1.11512 | 0.252   | 0.94207 | 0.44027  | 1.094707 | 0.25106 | 1.24563 | 0.0212  | 0.995098 | 0.94742 | 1.09363 | 0.814591 |
| 4.48  | 43.75 | gi 4506613  | 60S ribosomal protein L22 proprotein [Homo sapiens]                                           | 5  | 0.92582 | 0.39406 | 0.88941 | 0.431866 | 0.985671 | 0.87993 | 1.04055 | 0.82157 | 0.807588 | 0.15141 | 1.03663 | 0.815932 |
| 24.64 | 51.1  | gi 4505773  | prohibitin [Homo sapiens]                                                                     | 12 | 0.96556 | 0.73689 | 1.04412 | 0.592809 | 1.132968 | 0.46259 | 1.04172 | 0.8169  | 1.082056 | 0.61104 | 0.97867 | 0.817195 |
| 11.24 | 18.99 | gi 4503481  | elongation factor 1-gamma [Homo sapiens]                                                      | 6  | 1.03165 | 0.89414 | 0.94509 | 0.835196 | 1.099946 | 0.45211 | 0.90037 | 0.57359 | 1.077196 | 0.62388 | 1.04039 | 0.819465 |
| 6.64  | 18.97 | gi 7330335  | chloride intracellular channel protein 4 [Homo sapiens]                                       | 4  | 1.02164 | 0.91147 | 1.13859 | 0.422729 | 1.466823 | 0.16472 | 1.11304 | 0.48267 | 1.016055 | 0.92994 | 0.97107 | 0.819961 |
| 4.29  | 30.6  | gi 20544151 | chromobox protein homolog 3 [Homo sapiens]                                                    | 3  | 1.08761 | 0.76023 | 1.14249 | 0.606873 | 0.916121 | 0.50274 | 1.29959 | 0.53768 | 0.975734 | 0.92692 | 1.07487 | 0.821474 |

|        |       |              |                                                                                            |     |         |         |         |          |          |         |         |         |          |         |         |          |
|--------|-------|--------------|--------------------------------------------------------------------------------------------|-----|---------|---------|---------|----------|----------|---------|---------|---------|----------|---------|---------|----------|
| 8.04   | 9.255 | gi 5730027   | KH domain-containing, RNA-binding, signal transduction-associated protein 1 [Homo sapiens] | 5   | 1.06558 | 0.65957 | 0.93595 | 0.427594 | 0.998715 | 0.99478 | 0.95233 | 0.74678 | 0.92066  | 0.80624 | 0.96775 | 0.822087 |
| 4.95   | 3.383 | gi 19743823  | integrin beta-1 isoform 1A precursor [Homo sapiens]                                        | 3   | 1.32055 | 0.10167 | 1.13929 | 0.259019 | 1.350968 | 0.06939 | 1.04784 | 0.8101  | 1.521222 | 0.03788 | 1.08382 | 0.82873  |
| 172.41 | 48.02 | gi 160420317 | filamin-A isoform 2 [Homo sapiens]                                                         | 119 | 0.97842 | 0.41197 | 0.99518 | 0.85802  | 0.967653 | 0.27161 | 0.98363 | 0.61147 | 0.984986 | 0.55125 | 0.99244 | 0.828854 |
| 15.29  | 20.61 | gi 16579885  | 60S ribosomal protein L4 [Homo sapiens]                                                    | 7   | 1.07615 | 0.33021 | 1.01311 | 0.924931 | 1.084191 | 0.48575 | 1.04919 | 0.72858 | 0.997751 | 0.98856 | 0.9789  | 0.833723 |
| 14.5   | 32.11 | gi 4504041   | guanine nucleotide-binding protein G(i) subunit alpha-2 isoform 1 [Homo sapiens]           | 9   | 1.13704 | 0.56315 | 0.96894 | 0.813532 | 1.020694 | 0.96158 | 0.93776 | 0.64576 | 1.055722 | 0.81975 | 1.02806 | 0.8344   |
| 6.42   | 16.02 | gi 5802974   | thioredoxin-dependent peroxide reductase, mitochondrial isoform a precursor [Homo sapiens] | 4   | 0.96798 | 0.81028 | 0.95634 | 0.515702 | 1.033963 | 0.62264 | 1.22076 | 0.55074 | 0.991637 | 0.90516 | 1.02995 | 0.835193 |
| 2.7    | 9.494 | gi 4506681   | 40S ribosomal protein S11 [Homo sapiens]                                                   | 2   | 0.99409 | 0.97465 | 1.13149 | 0.545044 | 1.047803 | 0.88522 | 1.08859 | 0.77372 | 0.982615 | 0.92298 | 1.06109 | 0.835841 |
| 8.42   | 9.772 | gi 154354966 | mitochondrial inner membrane protein isoform 3 [Homo sapiens]                              | 5   | 1.0206  | 0.93464 | 1.03532 | 0.871746 | 0.988825 | 0.96777 | 0.9628  | 0.86904 | 1.0296   | 0.89968 | 0.96498 | 0.837598 |
| 4.45   | 61.11 | gi 28173554  | histone H2B type 3-B [Homo sapiens]                                                        | 43  | 1.02072 | 0.90655 | 0.96056 | 0.861582 | 1.037087 | 0.84719 | 1.18373 | 0.44769 | 0.948548 | 0.65963 | 1.0357  | 0.838179 |
| 6.43   | 18.29 | gi 4506901   | serine/arginine-rich splicing factor 3 [Homo sapiens]                                      | 3   | 0.9852  | 0.96279 | 1.1985  | 0.438019 | 1.078372 | 0.69505 | 1.06264 | 0.90255 | 0.984337 | 0.93061 | 0.92951 | 0.838933 |

|       |       |              |                                                                                  |    |         |         |         |          |          |         |         |         |          |         |         |          |
|-------|-------|--------------|----------------------------------------------------------------------------------|----|---------|---------|---------|----------|----------|---------|---------|---------|----------|---------|---------|----------|
| 2.06  | 18.42 | gi 4507793   | ubiquitin-conjugating enzyme E2 N [Homo sapiens]                                 | 1  | 1.16792 | 0.65472 | 1.21634 | 0.809184 | 1.932162 | 0.44384 | 1.52095 | 0.40788 | 0.920573 | 0.83344 | 1.21791 | 0.840396 |
| 1.92  | 7.042 | gi 5174449   | histone H1x [Homo sapiens]                                                       | 1  | 0.85343 | 0.28064 | 0.85981 | 0.345885 | 0.741735 | 0.07861 | 0.83554 | 0.26722 | 0.963425 | 0.82536 | 1.04754 | 0.841578 |
| 2.64  | 38.34 | gi 10835049  | transforming protein RhoA precursor [Homo sapiens]                               | 8  | 0.99703 | 0.98135 | 0.79242 | 0.729798 | 0.851819 | 0.80345 | 1.07826 | 0.72817 | 0.687668 | 0.33072 | 0.822   | 0.841902 |
| 3.96  | 3.659 | gi 166795299 | solute carrier family 2, facilitated glucose transporter member 1 [Homo sapiens] | 2  | 1.04935 | 0.91109 | 0.94918 | 0.915556 | 0.754969 | 0.25409 | 1.11376 | 0.68062 | 1.154167 | 0.39811 | 1.02541 | 0.847455 |
| 2.29  | 20.38 | gi 5803137   | putative RNA-binding protein 3 [Homo sapiens]                                    | 1  | 1.08481 | 0.88279 | 0.85746 | 0.624625 | 0.849487 | 0.80461 | 1.20187 | 0.86022 | 0.779833 | 0.50567 | 0.93073 | 0.84798  |
| 2.51  | 2.204 | gi 7661936   | scaffold attachment factor B2 [Homo sapiens]                                     | 2  | 1.01899 | 0.91967 | 1.04755 | 0.836359 | 1.058761 | 0.80586 | 0.94253 | 0.81642 | 1.236486 | 0.51996 | 0.95485 | 0.848025 |
| 9.61  | 16.74 | gi 73486658  | aspartate aminotransferase, mitochondrial precursor [Homo sapiens]               | 5  | 0.96036 | 0.87103 | 0.97537 | 0.860831 | 1.070459 | 0.6887  | 1.07102 | 0.52078 | 1.011362 | 0.91313 | 1.03523 | 0.849832 |
| 6.79  | 29.52 | gi 50592994  | thioredoxin isoform 1 [Homo sapiens]                                             | 4  | 0.87285 | 0.42193 | 1.06975 | 0.476514 | 1.075307 | 0.44631 | 0.97736 | 0.91538 | 0.937442 | 0.49301 | 0.9463  | 0.854211 |
| 23.82 | 61.48 | gi 4507879   | voltage-dependent anion-selective channel protein 1 [Homo sapiens]               | 14 | 0.97731 | 0.69263 | 0.92668 | 0.34112  | 0.913339 | 0.34029 | 0.97341 | 0.74774 | 0.978336 | 0.79238 | 1.0166  | 0.858966 |
| 3.32  | 12.62 | gi 4758018   | calponin-2 isoform a [Homo sapiens]                                              | 3  | 1.19158 | 0.71105 | 1.19474 | 0.741549 | 0.728561 | 0.79122 | 1.01345 | 0.96606 | 0.868569 | 0.78228 | 1.14008 | 0.860278 |
| 4.75  | 26.37 | gi 299523086 | mesencephalic astrocyte-derived neurotrophic factor precursor [Homo sapiens]     | 5  | 1.11545 | 0.57209 | 1.11679 | 0.585957 | 1.029277 | 0.91557 | 1.01628 | 0.94928 | 1.076269 | 0.66921 | 1.04584 | 0.860548 |

|       |       |              |                                                                                     |    |         |         |         |          |          |         |         |         |          |         |         |          |
|-------|-------|--------------|-------------------------------------------------------------------------------------|----|---------|---------|---------|----------|----------|---------|---------|---------|----------|---------|---------|----------|
| 7.7   | 20.63 | gi 34740329  | heterogeneous<br>nuclear<br>ribonucleoprotein A3<br>[Homo sapiens]                  | 10 | 1.10445 | 0.17571 | 0.9032  | 0.316306 | 1.145317 | 0.40173 | 1.07986 | 0.8933  | 1.122994 | 0.34016 | 1.02019 | 0.860986 |
| 6.05  | 10.77 | gi 117168248 | 3-hydroxyacyl-CoA<br>dehydratase 3 [Homo<br>sapiens]                                | 4  | 0.84957 | 0.44745 | 0.8334  | 0.161112 | 1.038632 | 0.8902  | 0.95966 | 0.90221 | 1.045877 | 0.88382 | 0.9249  | 0.862774 |
| 26.92 | 24.93 | gi 14141152  | heterogeneous<br>nuclear<br>ribonucleoprotein M<br>isoform a [Homo<br>sapiens]      | 17 | 1.08628 | 0.35293 | 1.03725 | 0.695026 | 1.026806 | 0.73823 | 0.99633 | 0.96725 | 1.016342 | 0.83824 | 0.98941 | 0.873553 |
| 3.23  | 12.07 | gi 170763500 | protein SET isoform<br>1 [Homo sapiens]                                             | 4  | 1.0848  | 0.69043 | 1.03571 | 0.725061 | 1.088743 | 0.67097 | 0.98089 | 0.84488 | 1.116083 | 0.53368 | 0.97681 | 0.873979 |
| 12.24 | 64.24 | gi 88999583  | myosin light<br>polypeptide 6 isoform<br>2 [Homo sapiens]                           | 15 | 0.94267 | 0.343   | 0.9248  | 0.245371 | 0.932394 | 0.26936 | 0.99883 | 0.9843  | 0.985798 | 0.8209  | 0.9908  | 0.876608 |
| 2.04  | 11.88 | gi 63025214  | vacuolar ATPase<br>assembly integral<br>membrane protein<br>VMA21 [Homo<br>sapiens] | 1  | 0.90619 | 0.51417 | 0.99561 | 0.972821 | 1.057661 | 0.75898 | 1.18775 | 0.61068 | 1.014332 | 0.97255 | 0.96105 | 0.878343 |
| 7.9   | 9.387 | gi 29789090  | protein RCC2 [Homo<br>sapiens]                                                      | 4  | 1.11316 | 0.66394 | 1.06546 | 0.807756 | 1.060682 | 0.8303  | 0.96863 | 0.86843 | 1.225477 | 0.32522 | 1.03343 | 0.879579 |
| 27.24 | 41.98 | gi 117190254 | heterogeneous<br>nuclear<br>ribonucleoproteins<br>C1/C2 isoform b<br>[Homo sapiens] | 17 | 1.02698 | 0.67678 | 0.92177 | 0.182329 | 0.974944 | 0.74372 | 1.04255 | 0.69517 | 0.976558 | 0.74628 | 0.99    | 0.88068  |
| 18.26 | 15.39 | gi 189458819 | transferrin receptor<br>protein 1 [Homo<br>sapiens]                                 | 11 | 1.11446 | 0.42576 | 0.99792 | 0.991522 | 1.124781 | 0.5508  | 1.14668 | 0.4871  | 0.988161 | 0.94215 | 0.94789 | 0.881912 |
| 8.03  | 10.46 | gi 63162572  | T-complex protein 1<br>subunit gamma<br>isoform a [Homo<br>sapiens]                 | 4  | 0.82695 | 0.56059 | 0.81169 | 0.577272 | 1.153473 | 0.80554 | 0.82045 | 0.75663 | 1.050539 | 0.85656 | 0.93205 | 0.890922 |

|       |        |              |                                                                      |    |         |         |         |          |          |         |         |         |          |         |         |          |
|-------|--------|--------------|----------------------------------------------------------------------|----|---------|---------|---------|----------|----------|---------|---------|---------|----------|---------|---------|----------|
| 2.38  | 5.536  | gi 11056044  | inorganic<br>pyrophosphatase<br>[Homo sapiens]                       | 1  | 1.04929 | 0.9395  | 0.99655 | 0.995222 | 1.184591 | 0.80537 | 1.15813 | 0.82207 | 1.036608 | 0.79363 | 1.15318 | 0.891584 |
| 2.5   | 0.6877 | gi 56676335  | telomere-associated<br>protein RIF1 isoform<br>1 [Homo sapiens]      | 1  | 1.08279 | 0.66024 | 0.87066 | 0.777724 | 0.618766 | 0.34994 | 0.55636 | 0.52788 | 0.984399 | 0.9835  | 0.92906 | 0.892763 |
| 4.92  | 16.95  | gi 315221152 | 60S ribosomal<br>protein L11 isoform 2<br>[Homo sapiens]             | 4  | 1.06126 | 0.56421 | 0.99761 | 0.975118 | 1.065146 | 0.43782 | 0.95199 | 0.536   | 1.085682 | 0.32948 | 0.98499 | 0.89321  |
| 11.85 | 27.44  | gi 4504425   | high mobility group<br>protein B1 [Homo<br>sapiens]                  | 8  | 1.025   | 0.85145 | 0.92685 | 0.563656 | 0.927637 | 0.65527 | 1.01212 | 0.93795 | 0.957028 | 0.6268  | 0.97689 | 0.893937 |
| 13.77 | 28.61  | gi 24308201  | adipocyte plasma<br>membrane-associated<br>protein [Homo<br>sapiens] | 10 | 0.83601 | 0.21067 | 1.06307 | 0.479644 | 0.886176 | 0.51837 | 0.86221 | 0.20778 | 0.968326 | 0.63722 | 1.03196 | 0.894531 |
| 4.42  | 26.57  | gi 4506701   | 40S ribosomal<br>protein S23 [Homo<br>sapiens]                       | 3  | 0.87112 | 0.40648 | 0.72728 | 0.199117 | 0.817343 | 0.42284 | 0.7103  | 0.30555 | 1.074612 | 0.66576 | 1.01694 | 0.896721 |
| 8.13  | 45.19  | gi 4506693   | 40S ribosomal<br>protein S17 [Homo<br>sapiens]                       | 6  | 0.99431 | 0.97242 | 0.97255 | 0.722537 | 1.038886 | 0.75248 | 1.03874 | 0.67553 | 1.034698 | 0.66409 | 0.98707 | 0.899802 |
| 10.13 | 20.93  | gi 5453603   | T-complex protein 1<br>subunit beta isoform<br>1 [Homo sapiens]      | 6  | 1.09951 | 0.79704 | 1.08657 | 0.641929 | 1.428159 | 0.05029 | 1.03563 | 0.83282 | 0.912354 | 0.81703 | 1.02791 | 0.899862 |
| 5.67  | 46.15  | gi 21464101  | 14-3-3 protein<br>gamma [Homo<br>sapiens]                            | 15 | 1.02568 | 0.83239 | 1.03997 | 0.769753 | 0.969569 | 0.85613 | 0.90003 | 0.52358 | 0.991797 | 0.94948 | 0.96655 | 0.900023 |
| 16.61 | 9.229  | gi 256222411 | filamin-B isoform 1<br>[Homo sapiens]                                | 20 | 0.98336 | 0.8992  | 1.02555 | 0.853117 | 1.118949 | 0.54084 | 0.99812 | 0.9923  | 0.991695 | 0.90764 | 0.97554 | 0.900285 |
| 4.3   | 11.45  | gi 388240801 | lamin-B2 [Homo<br>sapiens]                                           | 7  | 0.87942 | 0.71958 | 1.10445 | 0.77971  | 0.78914  | 0.61079 | 0.91952 | 0.83412 | 0.95001  | 0.85965 | 0.94256 | 0.901109 |
| 1.3   | 2.058  | gi 39753957  | torsin-1A-interacting<br>protein 1 isoform 2<br>[Homo sapiens]       | 1  | 0.83348 | 0.33185 | 0.96138 | 0.867541 | 1.103016 | 0.62859 | 0.87927 | 0.53707 | 1.083103 | 0.74121 | 1.05113 | 0.903757 |

|       |       |              |                                                                                      |    |         |         |         |          |          |         |         |         |          |         |         |          |
|-------|-------|--------------|--------------------------------------------------------------------------------------|----|---------|---------|---------|----------|----------|---------|---------|---------|----------|---------|---------|----------|
| 9.32  | 22.16 | gi 14141193  | 40S ribosomal protein S9 [Homo sapiens]                                              | 5  | 0.99992 | 0.99954 | 0.92862 | 0.763386 | 0.945508 | 0.76024 | 0.95503 | 0.83905 | 1.075762 | 0.60233 | 1.01905 | 0.904019 |
| 8.11  | 27.47 | gi 34098946  | nuclease-sensitive element-binding protein 1 [Homo sapiens]                          | 5  | 1.07413 | 0.56558 | 1.14988 | 0.476996 | 1.06747  | 0.59239 | 1.0434  | 0.82634 | 1.220969 | 0.45264 | 1.0157  | 0.90823  |
| 2.15  | 8.894 | gi 42822874  | ribonuclease inhibitor [Homo sapiens]                                                | 2  | 0.80302 | 0.27929 | 0.90655 | 0.700213 | 1.344467 | 0.6081  | 1.12269 | 0.45072 | 1.136887 | 0.41847 | 0.98588 | 0.909263 |
| 3.12  | 2.452 | gi 225543215 | antigen KI-67 isoform 2 [Homo sapiens]                                               | 4  | 1.03006 | 0.8092  | 0.87668 | 0.728422 | 1.203502 | 0.26766 | 1.24771 | 0.44123 | 1.27859  | 0.18565 | 1.03634 | 0.910268 |
| 3.52  | 50.74 | gi 4885385   | histone H3.3 [Homo sapiens]                                                          | 11 | 0.96893 | 0.81563 | 0.94274 | 0.67602  | 1.054957 | 0.7012  | 0.9351  | 0.87652 | 1.046815 | 0.7414  | 1.02837 | 0.910912 |
| 7.22  | 22.4  | gi 4506457   | reticulocalbin-2 precursor [Homo sapiens]                                            | 5  | 1.38471 | 0.39167 | 1.2916  | 0.445955 | 1.296941 | 0.47927 | 1.43781 | 0.41555 | 1.536593 | 0.26422 | 1.06997 | 0.911035 |
| 1.65  | 2.682 | gi 50659095  | nucleolar RNA helicase 2 isoform 1 [Homo sapiens]                                    | 2  | 1.01952 | 0.95996 | 1.38491 | 0.187652 | 1.017043 | 0.89225 | 1.16703 | 0.36259 | 0.984875 | 0.91557 | 0.97993 | 0.915927 |
| 3.63  | 9.016 | gi 5031777   | isocitrate dehydrogenase [NAD] subunit alpha, mitochondrial precursor [Homo sapiens] | 2  | 1.16688 | 0.3754  | 1.19345 | 0.716846 | 1.497555 | 0.3531  | 1.59903 | 0.20131 | 1.23718  | 0.57148 | 1.03029 | 0.917579 |
| 12.62 | 25    | gi 15431301  | 60S ribosomal protein L7 [Homo sapiens]                                              | 7  | 0.92425 | 0.48551 | 1.03374 | 0.876283 | 0.95133  | 0.5483  | 0.99818 | 0.99234 | 1.082148 | 0.57258 | 1.0118  | 0.917983 |
| 4.7   | 24    | gi 256222019 | ras-related protein Rab-10 [Homo sapiens]                                            | 5  | 0.94102 | 0.6384  | 0.90518 | 0.403307 | 0.902896 | 0.68559 | 0.80889 | 0.38432 | 0.987171 | 0.95238 | 0.95457 | 0.918074 |

|       |       |             |                                                                                                                                                                                                                                  |   |         |         |         |          |          |         |         |         |          |         |         |          |
|-------|-------|-------------|----------------------------------------------------------------------------------------------------------------------------------------------------------------------------------------------------------------------------------|---|---------|---------|---------|----------|----------|---------|---------|---------|----------|---------|---------|----------|
| 3.12  | 2.979 | gi 22749415 | dolichyl-<br>diphosphooligosacch<br>aride--protein<br>glycosyltransferase<br>subunit STT3A<br>[Homo sapiens]<br>NADH<br>dehydrogenase<br>[ubiquinone] iron-<br>sulfur protein 3,<br>mitochondrial<br>precursor [Homo<br>sapiens] | 1 | 1.06993 | 0.62139 | 1.02313 | 0.947688 | 0.891197 | 0.48906 | 1.44778 | 0.43354 | 1.22369  | 0.29182 | 0.94878 | 0.91885  |
| 2.09  | 5.682 | gi 4758788  | electron transfer<br>flavoprotein subunit<br>alpha, mitochondrial<br>isoform a [Homo<br>sapiens]                                                                                                                                 | 7 | 0.745   | 0.58946 | 1.25831 | 0.663793 | 0.924426 | 0.79947 | 0.83736 | 0.64983 | 0.555631 | 0.57613 | 0.93131 | 0.921689 |
| 2.45  | 7.143 | gi 4759160  | small nuclear<br>ribonucleoprotein Sm<br>D3 [Homo sapiens]                                                                                                                                                                       | 1 | 0.90276 | 0.57568 | 0.9279  | 0.468609 | 0.88426  | 0.48308 | 0.81171 | 0.52085 | 0.831009 | 0.17558 | 0.98806 | 0.923847 |
| 5.42  | 23.08 | gi 4758302  | enhancer of<br>rudimentary homolog<br>[Homo sapiens]                                                                                                                                                                             | 3 | 1.03392 | 0.80889 | 1.12985 | 0.460855 | 1.232816 | 0.30435 | 1.13608 | 0.57846 | 0.945932 | 0.6978  | 1.02672 | 0.926136 |
| 2.46  | 3.648 | gi 5031703  | ras GTPase-activating<br>protein-binding<br>protein 1 [Homo<br>sapiens]                                                                                                                                                          | 1 | 0.92013 | 0.57087 | 0.85965 | 0.452881 | 0.880045 | 0.48158 | 0.95338 | 0.81138 | 0.917742 | 0.69749 | 0.95912 | 0.926288 |
| 4.52  | 7.756 | gi 56549640 | septin-2 [Homo<br>sapiens]                                                                                                                                                                                                       | 3 | 0.99332 | 0.99483 | 1.23575 | 0.823806 | 1.353351 | 0.76378 | 1.72484 | 0.58133 | 1.284647 | 0.70863 | 0.93565 | 0.926332 |
| 1.68  | 5.263 | gi 4758356  | flap endonuclease 1<br>[Homo sapiens]                                                                                                                                                                                            | 1 | 1.15011 | 0.39223 | 1.10884 | 0.675855 | 1.067793 | 0.6274  | 1.00338 | 0.98366 | 0.94599  | 0.67436 | 1.01114 | 0.929123 |
| 11.37 | 23.19 | gi 4506725  | 40S ribosomal<br>protein S4, X isoform<br>X isoform [Homo<br>sapiens]                                                                                                                                                            | 5 | 0.97449 | 0.7355  | 0.92138 | 0.507416 | 0.964998 | 0.73662 | 1.12599 | 0.23149 | 0.953784 | 0.56743 | 1.00613 | 0.930998 |

|       |       |              |                                                                 |    |         |         |         |          |          |         |         |         |          |         |         |          |
|-------|-------|--------------|-----------------------------------------------------------------|----|---------|---------|---------|----------|----------|---------|---------|---------|----------|---------|---------|----------|
| 6.34  | 23.31 | gi 7305503   | stomatin-like protein 2 [Homo sapiens]                          | 5  | 1.17661 | 0.76853 | 1.01792 | 0.956275 | 0.970179 | 0.89195 | 1.06593 | 0.66163 | 0.877609 | 0.82736 | 1.03079 | 0.931181 |
| 10.33 | 10.26 | gi 55770844  | catenin alpha-1 [Homo sapiens]                                  | 6  | 1.03773 | 0.77724 | 1.42203 | 0.622809 | 1.56616  | 0.3328  | 1.23645 | 0.37736 | 0.997016 | 0.98129 | 1.04962 | 0.932653 |
| 9.63  | 46.12 | gi 4507953   | zeta/delta [Homo sapiens]                                       | 15 | 0.89929 | 0.60586 | 0.98527 | 0.856421 | 1.099533 | 0.64591 | 0.782   | 0.35808 | 0.893897 | 0.20654 | 1.01769 | 0.935496 |
| 4.47  | 42.89 | gi 50592996  | tubulin beta-3 chain isoform 1 [Homo sapiens]                   | 29 | 0.78939 | 0.25372 | 1.16165 | 0.795319 | 0.842534 | 0.33496 | 0.84947 | 0.34915 | 0.973308 | 0.83089 | 1.03767 | 0.937168 |
| 6.89  | 5.112 | gi 332688210 | catenin delta-1 isoform 1AC [Homo sapiens]                      | 4  | 1.02514 | 0.97096 | 0.55873 | 0.469676 | 1.062146 | 0.89209 | 1.20211 | 0.85366 | 0.898966 | 0.87101 | 0.97397 | 0.939865 |
| 6.98  | 58.88 | gi 4507729   | tubulin beta-2A chain [Homo sapiens]                            | 41 | 0.948   | 0.76834 | 0.9999  | 0.99978  | 0.903984 | 0.61965 | 0.88799 | 0.79613 | 0.752115 | 0.29768 | 0.96998 | 0.940554 |
| 16.43 | 40.26 | gi 24234747  | interleukin enhancer-binding factor 2 isoform 1 [Homo sapiens]  | 13 | 1.0511  | 0.7347  | 0.91691 | 0.632643 | 0.969474 | 0.89625 | 0.95433 | 0.83549 | 0.978358 | 0.87143 | 0.98794 | 0.942942 |
| 9.34  | 25.2  | gi 4505753   | phosphoglycerate mutase 1 [Homo sapiens]                        | 8  | 0.96526 | 0.90588 | 1.29984 | 0.237936 | 0.99391  | 0.9809  | 1.07441 | 0.81875 | 0.812698 | 0.54835 | 1.02478 | 0.944817 |
| 5.71  | 5.972 | gi 15991831  | hexokinase-1 isoform HKI-ta/tb [Homo sapiens]                   | 4  | 1.10822 | 0.50056 | 1.13319 | 0.676442 | 1.011951 | 0.97474 | 1.03129 | 0.9428  | 0.989503 | 0.97605 | 0.98934 | 0.947689 |
| 3.41  | 14.19 | gi 4506625   | 60S ribosomal protein L27a [Homo sapiens]                       | 2  | 0.99323 | 0.96296 | 1.09852 | 0.728854 | 0.889413 | 0.73997 | 1.01465 | 0.96828 | 0.90663  | 0.53302 | 1.02292 | 0.950836 |
| 5.31  | 19.58 | gi 4757908   | calcyphosin isoform a [Homo sapiens]                            | 4  | 0.7789  | 0.18217 | 1.03856 | 0.851888 | 0.898004 | 0.30411 | 0.85694 | 0.39045 | 0.957459 | 0.62455 | 0.98766 | 0.952912 |
| 3.08  | 4.58  | gi 11386147  | proactivator polypeptide isoform a preproprotein [Homo sapiens] | 2  | 0.7416  | 0.68952 | 1.1469  | 0.767531 | 0.803347 | 0.76691 | 0.88676 | 0.90596 | 1.279128 | 0.79946 | 1.05125 | 0.953217 |

|       |       |              |                                                                                   |    |         |         |         |          |          |         |         |         |          |         |         |          |
|-------|-------|--------------|-----------------------------------------------------------------------------------|----|---------|---------|---------|----------|----------|---------|---------|---------|----------|---------|---------|----------|
| 36.71 | 60.31 | gi 4502107   | annexin A5 [Homo sapiens]                                                         | 28 | 1.02188 | 0.71923 | 1.04762 | 0.283796 | 1.041221 | 0.53751 | 1.02478 | 0.79402 | 1.003106 | 0.9381  | 1.00371 | 0.960815 |
| 5.52  | 11.11 | gi 4758984   | ras-related protein Rab-11A isoform 1 [Homo sapiens]                              | 2  | 1.05913 | 0.823   | 0.92678 | 0.757553 | 1.219468 | 0.2448  | 1.02015 | 0.94044 | 0.980833 | 0.91924 | 1.01765 | 0.961985 |
| 7.02  | 9.559 | gi 127139033 | NADPH--cytochrome P450 reductase [Homo sapiens]                                   | 5  | 1.46665 | 0.26812 | 1.35078 | 0.78343  | 1.750845 | 0.28485 | 1.50179 | 0.58197 | 1.396446 | 0.19557 | 1.01903 | 0.963064 |
| 8.63  | 9.428 | gi 304555583 | elongation factor 1-delta isoform 1 [Homo sapiens]                                | 4  | 1.05626 | 0.86542 | 1.13667 | 0.76818  | 1.069415 | 0.889   | 1.01608 | 0.96552 | 1.236347 | 0.55616 | 1.01694 | 0.964416 |
| 19.2  | 40    | gi 4504245   | histone H2A type 1-C [Homo sapiens]                                               | 42 | 1.03017 | 0.86464 | 0.91872 | 0.699991 | 0.933817 | 0.74092 | 1.19479 | 0.32328 | 0.974854 | 0.83978 | 0.99492 | 0.967249 |
| 25.54 | 15.89 | gi 38202257  | neutral alpha-glucosidase AB isoform 2 precursor [Homo sapiens]                   | 14 | 1.04371 | 0.617   | 1.12201 | 0.3039   | 1.067465 | 0.42923 | 1.09288 | 0.44729 | 1.079871 | 0.33047 | 1.00402 | 0.967442 |
| 21.31 | 32.07 | gi 5031753   | heterogeneous nuclear ribonucleoprotein H [Homo sapiens]                          | 18 | 0.97527 | 0.83475 | 0.82622 | 0.394135 | 1.084716 | 0.50783 | 0.92009 | 0.68814 | 0.934815 | 0.65578 | 0.99293 | 0.972627 |
| 27.69 | 17    | gi 31621305  | leucine-rich PPR motif-containing protein, mitochondrial precursor [Homo sapiens] | 16 | 1.03366 | 0.87957 | 0.98367 | 0.912034 | 1.06177  | 0.80072 | 1.01847 | 0.89318 | 1.135167 | 0.43715 | 0.99557 | 0.974808 |
| 27.69 | 17    | gi 31621305  | leucine-rich PPR motif-containing protein, mitochondrial precursor [Homo sapiens] | 16 | 1.03366 | 0.87957 | 0.98367 | 0.912034 | 1.06177  | 0.80072 | 1.01847 | 0.89318 | 1.135167 | 0.43715 | 0.99557 | 0.974808 |
| 26.86 | 80.9  | gi 4507357   | transgelin-2 [Homo sapiens]                                                       | 44 | 0.94206 | 0.15285 | 0.98498 | 0.707045 | 0.982281 | 0.65704 | 0.95133 | 0.34752 | 0.973675 | 0.50977 | 0.99881 | 0.976356 |
| 4.24  | 33.33 | gi 4506715   | 40S ribosomal protein S28 [Homo sapiens]                                          | 2  | 1.06887 | 0.59919 | 1.27592 | 0.261705 | 1.038603 | 0.6719  | 1.2457  | 0.32914 | 1.089153 | 0.60128 | 1.00461 | 0.986721 |



|      |       |              |                                                                             |   |         |         |          |         |          |         |
|------|-------|--------------|-----------------------------------------------------------------------------|---|---------|---------|----------|---------|----------|---------|
| 9.52 | 11.28 | gi 28178832  | isocitrate dehydrogenase [NADP], mitochondrial precursor [Homo sapiens]     | 5 | 1.30054 | 0.97425 | 1.043614 | 0.95524 | 1.064548 | 1.35882 |
| 9.41 | 12.65 | gi 285002233 | glycerol-3-phosphate dehydrogenase, mitochondrial precursor [Homo sapiens]  | 8 | 0.63612 | 0.43177 | 0.605118 | 0.60499 | 0.806922 | 0.5378  |
| 9.02 | 44.56 | gi 28395033  | rho-related GTP-binding protein RhoC precursor [Homo sapiens]               | 6 | 1.92031 | 0.99363 | 1.700983 | 1.06466 | 1.078723 | 1.42801 |
| 8.89 | 4.503 | gi 38201623  | eukaryotic translation initiation factor 4 gamma 1 isoform 5 [Homo sapiens] | 9 | 0.66325 | 1.16796 | 0.670461 | 0.73769 | 1.420639 | 0.48499 |
| 8.26 | 6.069 | gi 4507943   | exportin-1 [Homo sapiens]                                                   | 4 |         |         |          |         |          |         |
| 8    | 79.82 | gi 4506669   | 60S acidic ribosomal protein P1 isoform 1 [Homo sapiens]                    | 7 | 1.06983 | 0.97872 | 1.0065   | 1.03349 | 0.986462 | 0.95046 |
| 7.94 | 8.063 | gi 45387945  | extended synaptotagmin-2 [Homo sapiens]                                     | 4 |         |         |          |         |          |         |
| 7.63 | 13.58 | gi 4507353   | TATA-binding protein-associated factor 2N isoform 2 [Homo sapiens]          | 5 |         |         |          |         |          |         |
| 7.35 | 56.82 | gi 11056061  | thymosin beta-4 [Homo sapiens]                                              | 5 | 0.92823 | 1.03146 | 1.020059 | 0.8738  | 0.987755 | 1.09835 |

|      |       |              |                                                                               |   |         |         |          |         |          |         |
|------|-------|--------------|-------------------------------------------------------------------------------|---|---------|---------|----------|---------|----------|---------|
| 7.22 | 4.92  | gi 4503509   | eukaryotic translation initiation factor 3 subunit A [Homo sapiens]           | 5 | 2.39279 | 4.4105  | 2.463701 | 3.54179 | 2.01806  | 2.10314 |
| 6.78 | 7.069 | gi 385298680 | 116 kDa U5 small nuclear ribonucleoprotein component isoform c [Homo sapiens] | 6 |         |         |          |         |          |         |
| 6.54 | 3.137 | gi 40217847  | U5 small nuclear ribonucleoprotein 200 kDa helicase [Homo sapiens]            | 6 | 1.14194 | 1.62901 | 0.86916  | 0.90805 | 1.30212  | 0.33775 |
| 6.25 | 4.864 | gi 21361370  | glycogen phosphorylase, brain form [Homo sapiens]                             | 4 | 0.74647 | 0.88615 | 0.815465 | 0.71197 | 0.782035 | 1.25844 |
| 6.23 | 3.298 | gi 54112117  | splicing factor 3B subunit 1 isoform 1 [Homo sapiens]                         | 3 |         |         |          |         |          |         |
| 6.23 | 5.349 | gi 71773329  | annexin A6 isoform 1 [Homo sapiens]                                           | 3 | 4.50272 | 3.54499 | 4.594796 | 3.09253 | 3.811192 | 5.69826 |
| 6.15 | 5.579 | gi 109148542 | alanine--tRNA ligase, cytoplasmic [Homo sapiens]                              | 3 | 0.82244 | 0.9845  | 0.950517 | 0.84237 | 0.686344 | 1.03448 |
| 6.15 | 20.49 | gi 7706322   | UPF0568 protein C14orf166 [Homo sapiens]                                      | 5 |         |         |          |         |          |         |
| 6.09 | 25.17 | gi 194097323 | enoyl-CoA hydratase, mitochondrial [Homo sapiens]                             | 7 | 2.03732 | 1.74468 | 2.134784 | 1.98122 | 1.267649 | 3.15589 |
| 6.08 | 28.65 | gi 222352151 | poly(rC)-binding protein 1 [Homo sapiens]                                     | 8 | 0.92485 | 0.81808 | 1.163378 | 1.00833 | 0.545206 | 1.00614 |
| 6.05 | 30.2  | gi 50593002  | U2 small nuclear ribonucleoprotein A' [Homo sapiens]                          | 6 | 1.12271 | 0.91509 | 1.310521 | 1.0248  | 1.543845 | 1.43563 |

|      |       |              |                                                                                                         |   |         |         |          |         |          |         |
|------|-------|--------------|---------------------------------------------------------------------------------------------------------|---|---------|---------|----------|---------|----------|---------|
| 5.09 | 9.605 | gi 4502643   | T-complex protein 1 subunit zeta isoform a [Homo sapiens]                                               | 4 | 0.66609 | 0.49984 | 1.35727  | 1.1912  | 0.776804 | 0.82225 |
| 4.98 | 6.839 | gi 45827806  | atlastin-3 [Homo sapiens]                                                                               | 3 |         |         |          |         |          |         |
| 4.97 | 6.071 | gi 38327039  | heat shock 70 kDa protein 4 [Homo sapiens]                                                              | 3 |         |         |          |         |          |         |
| 4.75 | 27.57 | gi 6912238   | peroxiredoxin-5, mitochondrial isoform a precursor [Homo sapiens]                                       | 5 | 0.7021  | 1.18907 | 1.478837 | 0.4313  | 1.39936  | 1.21253 |
| 4.67 | 7.559 | gi 4758786   | NADH dehydrogenase [ubiquinone] iron-sulfur protein 2, mitochondrial isoform 1 precursor [Homo sapiens] | 2 |         |         |          |         |          |         |
| 4.63 | 6.966 | gi 18677735  | protein PRRC1 [Homo sapiens]                                                                            | 3 |         |         |          |         |          |         |
| 4.5  | 14.94 | gi 23110942  | proteasome subunit alpha type-5 isoform 1 [Homo sapiens]                                                | 3 |         |         |          |         |          |         |
| 4.46 | 12.4  | gi 269914128 | OCIA domain-containing protein 1 isoform 4 [Homo sapiens]                                               | 2 | 1.21801 | 1.37961 | 1.346004 | 1.48184 | 1.117946 | 1.18723 |
| 4.44 | 10.44 | gi 4502049   | aldose reductase [Homo sapiens]                                                                         | 4 | 1.47454 | 1.36634 | 1.409654 | 0.99615 | 0.923845 | 1.00292 |
| 4.41 | 9.053 | gi 5453595   | adenylyl cyclase-associated protein 1 [Homo sapiens]                                                    | 4 | 1.57866 | 1.2196  | 2.380994 | 1.61705 | 1.994657 | 2.52747 |
| 4.4  | 5.615 | gi 4506341   | ATP-binding cassette sub-family D member 3 isoform a [Homo sapiens]                                     | 3 | 0.32324 | 0.75219 | 1.198383 | 1.30105 | 1.203778 | 1.54799 |

|      |       |              |                                                                                 |   |         |         |          |         |          |         |
|------|-------|--------------|---------------------------------------------------------------------------------|---|---------|---------|----------|---------|----------|---------|
| 4.39 | 3.725 | gi 6005757   | FACT complex subunit SPT16 [Homo sapiens] phosphatidylinositol-binding clathrin | 2 |         |         |          |         |          |         |
| 4.37 | 6.442 | gi 56788366  | assembly protein isoform 1 [Homo sapiens] dihydropyrimidinase-related protein 2 | 3 | 0.84523 | 0.80269 | 1.0253   | 0.9725  | 0.986006 | 0.97061 |
| 4.32 | 6.795 | gi 308818195 | isoform 1 [Homo sapiens]                                                        | 2 |         |         |          |         |          |         |
| 4.29 | 6.369 | gi 4505891   | procollagen-lysine,2-oxoglutarate 5-dioxygenase 3 precursor [Homo sapiens]      | 5 |         |         |          |         |          |         |
| 4.17 | 1.681 | gi 153946395 | tenascin precursor [Homo sapiens] alpha-aminoadipic semialdehyde                | 2 |         |         |          |         |          |         |
| 4.17 | 5.479 | gi 319655561 | dehydrogenase isoform 2 [Homo sapiens] vacuolar protein                         | 3 |         |         |          |         |          |         |
| 4.14 | 3.894 | gi 17999541  | sorting-associated protein 35 [Homo sapiens] glycine--tRNA ligase               | 3 |         |         |          |         |          |         |
| 4.13 | 6.225 | gi 116805340 | precursor [Homo sapiens]                                                        | 2 | 0.80401 | 0.7306  | 0.752112 | 0.67938 | 0.6988   | 0.817   |
| 4.12 | 5.368 | gi 302344762 | non-specific lipid-transfer protein isoform 6 proprotein [Homo sapiens]         | 2 |         |         |          |         |          |         |

|      |       |              |                                                                                                |   |         |         |          |         |          |         |
|------|-------|--------------|------------------------------------------------------------------------------------------------|---|---------|---------|----------|---------|----------|---------|
| 4.11 | 2.758 | gi 148536855 | coatomer subunit<br>alpha isoform 1<br>[Homo sapiens]                                          | 3 | 0.84495 | 1.14378 | 0.879331 | 1.20518 | 0.78377  | 0.92041 |
| 4.11 | 12.28 | gi 53692187  | actin-related protein 2<br>isoform a [Homo<br>sapiens]                                         | 3 |         |         |          |         |          |         |
| 4.11 | 6.528 | gi 5803187   | transaldolase [Homo<br>sapiens]                                                                | 3 |         |         |          |         |          |         |
| 4.11 | 6.742 | gi 6598323   | rab GDP dissociation<br>inhibitor beta isoform<br>1 [Homo sapiens]                             | 2 | 1.31164 | 1.35366 | 1.719467 | 1.22879 | 1.907645 | 1.82516 |
| 4.11 | 17.34 | gi 5454090   | translocon-associated<br>protein subunit delta<br>isoform 2 precursor<br>[Homo sapiens]        | 2 | 1.09614 | 1.01594 | 1.240244 | 1.2115  | 1.02137  | 1.06552 |
| 4.1  | 2.276 | gi 21361794  | cullin-associated<br>NEDD8-dissociated<br>protein 1 [Homo<br>sapiens]                          | 3 |         |         |          |         |          |         |
| 4.1  | 2.816 | gi 38569421  | ATP-citrate synthase<br>isoform 1 [Homo<br>sapiens]                                            | 2 | 1.47681 | 1.78721 | 2.177375 | 1.43963 | 1.056422 | 1.85165 |
| 4.1  | 12.5  | gi 19923315  | serine<br>hydroxymethyltransfe<br>rase, mitochondrial<br>isoform 1 precursor<br>[Homo sapiens] | 5 | 2.17269 | 1.45205 | 1.733907 | 1.84592 | 1.6707   | 1.17943 |
| 4.09 | 3.904 | gi 109134349 | coatomer subunit<br>gamma-2 [Homo<br>sapiens]                                                  | 2 |         |         |          |         |          |         |
| 4.08 | 7.196 | gi 195539395 | 26S protease<br>regulatory subunit<br>10B [Homo sapiens]                                       | 2 | 0.78017 | 0.46331 | 1.391888 | 1.14351 | 0.599761 | 1.27963 |

|      |       |              |                                                               |    |         |         |          |         |          |         |
|------|-------|--------------|---------------------------------------------------------------|----|---------|---------|----------|---------|----------|---------|
| 4.03 | 14.64 | gi 30410792  | proteasome activator complex subunit 2 [Homo sapiens]         | 3  | 1.35076 | 1.30523 | 0.949045 | 1.36713 | 1.264915 | 0.92517 |
| 4.02 | 8.119 | gi 166795301 | prenylcysteine oxidase 1 precursor [Homo sapiens]             | 3  | 1.05175 | 0.98525 | 1.0761   | 0.91641 | 0.986455 | 0.77613 |
| 4.02 | 4.662 | gi 8922712   | septin-11 [Homo sapiens]                                      | 2  |         |         |          |         |          |         |
| 4.01 | 5.568 | gi 37537716  | eukaryotic translation initiation factor 5 [Homo sapiens]     | 3  |         |         |          |         |          |         |
| 4.01 | 29.13 | gi 17933772  | protein S100-A16 [Homo sapiens]                               | 2  | 0.91551 | 0.57837 | 1.177884 | 1.32834 | 1.245144 | 1.04009 |
| 4    | 64.97 | gi 393715091 | tubulin alpha-1A chain isoform 1 [Homo sapiens]               | 61 | 0.86763 | 1.09195 | 1.091364 | 0.95509 | 0.999499 | 1.17204 |
| 4    | 17.76 | gi 151108473 | mitochondrial fission 1 protein [Homo sapiens]                | 2  |         |         |          |         |          |         |
| 4    | 41.07 | gi 7705501   | transmembrane protein 14C [Homo sapiens]                      | 2  |         |         |          |         |          |         |
| 3.91 | 27.97 | gi 21956645  | myotrophin [Homo sapiens]                                     | 3  |         |         |          |         |          |         |
| 3.85 | 4.626 | gi 25777602  | 26S proteasome non-ATPase regulatory subunit 2 [Homo sapiens] | 3  |         |         |          |         |          |         |
| 3.84 | 1.638 | gi 110611220 | ribosome-binding protein 1 [Homo sapiens]                     | 2  |         |         |          |         |          |         |
| 3.68 | 4.777 | gi 4758648   | kinesin-1 heavy chain [Homo sapiens]                          | 4  |         |         |          |         |          |         |
| 3.6  | 19.44 | gi 4759212   | tubulin-specific chaperone A [Homo sapiens]                   | 4  | 0.72985 | 0.79919 | 0.8261   | 0.89374 | 0.765348 | 0.87837 |

|      |       |              |                                                                                                     |   |         |         |          |         |          |         |
|------|-------|--------------|-----------------------------------------------------------------------------------------------------|---|---------|---------|----------|---------|----------|---------|
| 3.53 | 6.383 | gi 4501993   | alkyldihydroxyaceton<br>ephosphate synthase,<br>peroxisomal<br>precursor [Homo<br>sapiens]          | 3 | 1.3973  | 1.20706 | 1.229661 | 1.30968 | 0.870439 | 0.9839  |
| 3.47 | 6.713 | gi 9951915   | adenosylhomocystein<br>ase isoform 1 [Homo<br>sapiens]                                              | 3 | 0.91699 | 1.54572 | 0.960423 | 0.51959 | 1.187545 | 1.25412 |
| 3.47 | 11.58 | gi 397138571 | PREDICTED:<br>putative trypsin-6<br>isoform 2 [Homo<br>sapiens]                                     | 6 | 0.6452  | 0.71299 | 0.688758 | 0.84167 | 0.871762 | 0.4976  |
| 3.42 | 5.369 | gi 4503971   | rab GDP dissociation<br>inhibitor alpha<br>[Homo sapiens]                                           | 2 |         |         |          |         |          |         |
| 3.41 | 3.436 | gi 56676330  | heterochromatin<br>protein 1-binding<br>protein 3 [Homo<br>sapiens]                                 | 3 | 0.93177 | 1.38266 | 0.985569 | 0.63015 | 1.159698 | 0.87353 |
| 3.39 | 16.67 | gi 28933465  | syntaxin-12 [Homo<br>sapiens]                                                                       | 3 | 0.65228 | 1.28782 | 1.08027  | 0.56742 | 0.870332 | 1.17819 |
| 3.35 | 8.754 | gi 14591909  | 60S ribosomal<br>protein L5 [Homo<br>sapiens]                                                       | 2 | 0.96889 | 1.29402 | 0.971669 | 1.24532 | 1.17296  | 0.77783 |
| 3.33 | 3.212 | gi 45827771  | enhancer of mRNA-<br>decapping protein 4<br>[Homo sapiens]                                          | 2 |         |         |          |         |          |         |
| 3.33 | 6.25  | gi 38150007  | small nuclear<br>ribonucleoprotein-<br>associated proteins B<br>and B' isoform B'<br>[Homo sapiens] | 2 | 0.94294 | 0.69364 | 0.869764 | 0.63095 | 0.803134 | 0.49355 |
| 3.32 | 1.404 | gi 148529014 | DNA damage-binding<br>protein 1 [Homo<br>sapiens]                                                   | 2 |         |         |          |         |          |         |

|      |        |              |                                                                                          |   |         |         |          |         |          |         |
|------|--------|--------------|------------------------------------------------------------------------------------------|---|---------|---------|----------|---------|----------|---------|
| 3.27 | 10.32  | gi 4503139   | cathepsin B<br>preproprotein [Homo sapiens]                                              | 2 | 0.70471 | 0.80279 | 0.654314 | 0.69681 | 0.634219 | 0.7471  |
| 3.25 | 11.01  | gi 346644849 | DNA-(apurinic or<br>apyrimidinic site)<br>lyase [Homo sapiens]                           | 3 | 1.2326  | 1.04638 | 1.573288 | 1.95319 | 1.46752  | 1.26419 |
| 3.15 | 13.95  | gi 7705696   | thioredoxin domain-<br>containing protein 12<br>precursor [Homo sapiens]                 | 2 |         |         |          |         |          |         |
| 3.06 | 9.44   | gi 6005721   | erlin-2 isoform 1<br>[Homo sapiens]                                                      | 3 | 1.05746 | 1.13755 | 0.971272 | 1.06971 | 0.825092 | 1.21269 |
| 2.96 | 3.714  | gi 157389005 | calpain-2 catalytic<br>subunit isoform 1<br>[Homo sapiens]                               | 2 |         |         |          |         |          |         |
| 2.93 | 20.61  | gi 5802966   | destrin isoform a<br>[Homo sapiens]                                                      | 3 | 0.86667 | 1.08644 | 1.071251 | 0.54751 | 0.656449 | 0.63406 |
| 2.93 | 6.395  | gi 217272851 | prolyl 4-hydroxylase<br>subunit alpha-1<br>isoform 3 precursor<br>[Homo sapiens]         | 2 | 1.05682 | 0.51686 | 1.175281 | 1.00522 | 0.697477 | 1.48189 |
| 2.85 | 0.8478 | gi 194595509 | spectrin alpha chain,<br>brain isoform 1<br>[Homo sapiens]                               | 2 |         |         |          |         |          |         |
| 2.85 | 9.562  | gi 5454088   | acidic leucine-rich<br>nuclear<br>phosphoprotein 32<br>family member B<br>[Homo sapiens] | 2 |         |         |          |         |          |         |
| 2.81 | 18.62  | gi 7657257   | mitochondrial import<br>receptor subunit<br>TOM20 homolog<br>[Homo sapiens]              | 2 | 1.12647 | 0.96503 | 0.830369 | 1.03807 | 0.875227 | 0.89786 |
| 2.71 | 9.603  | gi 386781571 | radixin isoform 1<br>[Homo sapiens]                                                      | 6 | 0.81532 | 1.25499 | 1.601472 | 0.54108 | 0.565041 | 1.1877  |

|      |       |              |                                                                                        |    |         |         |          |         |          |         |
|------|-------|--------------|----------------------------------------------------------------------------------------|----|---------|---------|----------|---------|----------|---------|
| 2.67 | 9.375 | gi 42761474  | CD59 glycoprotein preproprotein [Homo sapiens]                                         | 1  | 0.86805 | 0.97073 | 0.997505 | 1.10319 | 0.866608 | 0.84686 |
| 2.65 | 1.65  | gi 9257257   | WD repeat-containing protein 1 isoform 1 [Homo sapiens]                                | 1  |         |         |          |         |          |         |
| 2.64 | 7.125 | gi 365192532 | myosin-10 isoform 1 [Homo sapiens]                                                     | 15 | 0.66064 | 0.65413 | 1.10042  | 0.93428 | 0.603853 | 0.98694 |
| 2.64 | 5.534 | gi 219283152 | apoptosis inhibitor 5 isoform a [Homo sapiens]                                         | 4  | 0.85311 | 1.16414 | 1.634897 | 1.38697 | 1.133337 | 1.00298 |
| 2.61 | 7.116 | gi 30410796  | proteasome activator complex subunit 3 isoform 2 [Homo sapiens]                        | 3  | 0.63085 | 0.92394 | 0.72022  | 0.36527 | 0.9777   | 0.76639 |
| 2.61 | 12.16 | gi 4507231   | single-stranded DNA-binding protein, mitochondrial precursor [Homo sapiens]            | 3  | 1.58337 | 1.341   | 1.461128 | 1.51503 | 1.563343 | 1.89598 |
| 2.6  | 7.182 | gi 7657441   | 28 kDa heat- and acid-stable phosphoprotein [Homo sapiens]                             | 1  | 0.85503 | 0.87906 | 0.343909 | 0.40988 | 0.740731 | 1.13019 |
| 2.58 | 10.82 | gi 13569879  | acidic leucine-rich nuclear phosphoprotein 32 family member E isoform 1 [Homo sapiens] | 3  |         |         |          |         |          |         |
| 2.51 | 1.262 | gi 283436220 | ATPase family AAA domain-containing protein 3A isoform 1 [Homo sapiens]                | 1  | 0.57696 | 0.62027 | 0.424078 | 0.20236 | 0.411318 | 0.31566 |
| 2.49 | 2.839 | gi 4885409   | vigilin isoform a [Homo sapiens]                                                       | 2  |         |         |          |         |          |         |

|      |       |              |                                                                             |    |         |         |          |         |          |         |
|------|-------|--------------|-----------------------------------------------------------------------------|----|---------|---------|----------|---------|----------|---------|
| 2.45 | 5.919 | gi 12056465  | rRNA 2'-O-methyltransferase fibrillar [Homo sapiens]                        | 2  | 0.84699 | 1.04848 | 0.77802  | 0.72476 | 0.814099 | 1.04849 |
| 2.43 | 7.67  | gi 312283701 | malate dehydrogenase, cytoplasmic isoform 1 [Homo sapiens]                  | 2  | 0.88475 | 0.75548 | 0.903711 | 0.51043 | 0.991972 | 0.72992 |
| 2.42 | 16.39 | gi 21040371  | ATP-dependent RNA helicase DDX39A [Homo sapiens]                            | 5  |         |         |          |         |          |         |
| 2.42 | 9.394 | gi 19923181  | PDZ and LIM domain protein 4 isoform 1 [Homo sapiens]                       | 3  | 0.74782 | 1.03132 | 1.006054 | 0.97864 | 1.449987 | 1.22062 |
| 2.4  | 32.52 | gi 4507949   | 14-3-3 protein beta/alpha [Homo sapiens]                                    | 14 | 1.25318 | 1.06152 | 1.807213 | 1.40418 | 0.817041 | 1.31435 |
| 2.38 | 1.307 | gi 11225260  | DNA topoisomerase 1 [Homo sapiens]                                          | 1  | 0.66957 | 0.99773 | 1.318882 | 0.92511 | 1.109218 | 1.38873 |
| 2.36 | 5.966 | gi 7657649   | tropomodulin-3 [Homo sapiens]                                               | 1  | 0.54916 | 0.58171 | 0.468889 | 0.03686 | 0.571124 | 0.66021 |
| 2.35 | 14.81 | gi 4505357   | NADH dehydrogenase [ubiquinone] 1 alpha subcomplex subunit 4 [Homo sapiens] | 1  | 1.14039 | 0.96507 | 1.457507 | 0.9558  | 1.061194 | 1.20029 |
| 2.34 | 1.223 | gi 124494238 | unconventional myosin-Ic isoform a [Homo sapiens]                           | 1  | 0.62802 | 0.55643 | 0.50495  | 0.18695 | 0.410643 | 0.63169 |
| 2.33 | 1.135 | gi 30581135  | structural maintenance of chromosomes protein 1A [Homo sapiens]             | 2  |         |         |          |         |          |         |

|      |       |              |                                                                                                      |   |         |         |          |         |          |         |
|------|-------|--------------|------------------------------------------------------------------------------------------------------|---|---------|---------|----------|---------|----------|---------|
| 2.33 | 2.57  | gi 21536326  | heterogeneous<br>nuclear<br>ribonucleoprotein U-<br>like protein 1 isoform<br>a [Homo sapiens]       | 1 | 0.27416 | 0.26981 | 0.297418 | 0.21473 | 0.517851 | 0.40407 |
| 2.32 | 4.837 | gi 38202214  | protein transport<br>protein Sec23A<br>[Homo sapiens]                                                | 2 |         |         |          |         |          |         |
| 2.31 | 1.844 | gi 10190742  | ubiquitin carboxyl-<br>terminal hydrolase 29<br>[Homo sapiens]                                       | 1 |         |         |          |         |          |         |
| 2.3  | 12.24 | gi 66737374  | protein S100-A13<br>[Homo sapiens]                                                                   | 1 | 1.52857 | 0.65298 | 0.87031  | 1.73263 | 1.020324 | 1.2015  |
| 2.29 | 10.38 | gi 373432684 | ubiquitin-conjugating<br>enzyme E2 L3<br>isoform 4 [Homo<br>sapiens]                                 | 3 |         |         |          |         |          |         |
| 2.29 | 6.407 | gi 4759034   | eukaryotic peptide<br>chain release factor<br>subunit 1 [Homo<br>sapiens]                            | 2 | 0.79436 | 0.80778 | 0.666296 | 0.44907 | 0.246555 | 0.56426 |
| 2.28 | 4.723 | gi 316983160 | NADH-ubiquinone<br>oxidoreductase 75<br>kDa subunit,<br>mitochondrial<br>isoform 5 [Homo<br>sapiens] | 2 |         |         |          |         |          |         |
| 2.27 | 23.2  | gi 4502203   | ADP-ribosylation<br>factor 3 [Homo<br>sapiens]                                                       | 4 | 1.20672 | 1.21644 | 1.051839 | 1.28095 | 0.886377 | 1.39553 |
| 2.26 | 1.534 | gi 33356174  | pinin [Homo sapiens]                                                                                 | 1 | 0.85067 | 0.83291 | 1.13135  | 0.86094 | 1.075418 | 0.5121  |
| 2.26 | 4.172 | gi 33469968  | DNA replication<br>licensing factor<br>MCM7 isoform 1<br>[Homo sapiens]                              | 2 | 0.66264 | 0.98625 | 1.075919 | 0.92704 | 0.936778 | 0.82464 |

|      |        |              |                                                                              |   |         |         |          |         |          |         |
|------|--------|--------------|------------------------------------------------------------------------------|---|---------|---------|----------|---------|----------|---------|
| 2.25 | 1.436  | gi 296317244 | extended<br>synaptotagmin-1<br>isoform 1 [Homo<br>sapiens]                   | 2 |         |         |          |         |          |         |
| 2.25 | 13.1   | gi 4506687   | 40S ribosomal<br>protein S15 [Homo<br>sapiens]                               | 2 | 0.72722 | 0.74515 | 0.691769 | 0.38782 | 0.804124 | 0.74194 |
| 2.25 | 7.981  | gi 4502303   | ATP synthase subunit<br>O, mitochondrial<br>precursor [Homo<br>sapiens]      | 2 | 1.18023 | 1.17369 | 0.871478 | 0.88042 | 0.799421 | 0.82527 |
| 2.25 | 10.62  | gi 31563374  | eukaryotic translation<br>initiation factor 6<br>isoform c [Homo<br>sapiens] | 1 |         |         |          |         |          |         |
| 2.24 | 1.957  | gi 11863154  | coatamer subunit<br>delta isoform 1<br>[Homo sapiens]                        | 1 |         |         |          |         |          |         |
| 2.24 | 1.579  | gi 51944971  | nodal modulator 2<br>isoform 1 precursor<br>[Homo sapiens]                   | 1 |         |         |          |         |          |         |
| 2.24 | 1.062  | gi 21237808  | SWI/SNF complex<br>subunit SMARCC2<br>isoform b [Homo<br>sapiens]            | 1 |         |         |          |         |          |         |
| 2.24 | 4.889  | gi 7661922   | ras-related protein<br>Rab-21 [Homo<br>sapiens]                              | 1 | 1.2084  | 0.76928 | 1.115088 | 0.71112 | 0.929048 | 0.73102 |
| 2.23 | 0.9009 | gi 27477134  | nuclear pore<br>membrane<br>glycoprotein 210<br>precursor [Homo<br>sapiens]  | 1 |         |         |          |         |          |         |
| 2.23 | 1.794  | gi 24797086  | importin-5 [Homo<br>sapiens]                                                 | 1 | 1.02307 | 1.20567 | 1.213528 | 1.21964 | 0.937203 | 0.83983 |

|      |        |             |                                                                                                      |   |         |         |          |         |          |         |
|------|--------|-------------|------------------------------------------------------------------------------------------------------|---|---------|---------|----------|---------|----------|---------|
| 2.22 | 1.463  | gi 61742777 | leucyl-cystinyl<br>aminopeptidase<br>isoform 1 [Homo<br>sapiens]                                     | 1 |         |         |          |         |          |         |
| 2.22 | 2.968  | gi 4826960  | glutamine--tRNA<br>ligase [Homo<br>sapiens]                                                          | 2 |         |         |          |         |          |         |
| 2.21 | 1.286  | gi 31377697 | procollagen<br>galactosyltransferase<br>1 precursor [Homo<br>sapiens]                                | 1 | 0.89469 | 0.93139 | 1.864245 | 1.28507 | 2.11273  | 1.20325 |
| 2.2  | 1.372  | gi 19924129 | DNA repair protein<br>RAD50 [Homo<br>sapiens]                                                        | 1 |         |         |          |         |          |         |
| 2.19 | 2.111  | gi 14043022 | methionine--tRNA<br>ligase, cytoplasmic<br>[Homo sapiens]                                            | 1 |         |         |          |         |          |         |
| 2.18 | 5.882  | gi 4506623  | 60S ribosomal<br>protein L27 [Homo<br>sapiens]                                                       | 1 | 1.10035 | 0.91496 | 0.965733 | 1.13191 | 0.864173 | 1.03142 |
| 2.17 | 1.894  | gi 6912482  | LETM1 and EF-hand<br>domain-containing<br>protein 1,<br>mitochondrial<br>precursor [Homo<br>sapiens] | 1 | 0.71105 | 0.92143 | 1.40973  | 1.03453 | 0.92632  | 0.9231  |
| 2.17 | 1.799  | gi 4504373  | beta-hexosaminidase<br>subunit beta<br>preproprotein [Homo<br>sapiens]                               | 1 |         |         |          |         |          |         |
| 2.16 | 0.8333 | gi 21264365 | nuclear pore complex<br>protein Nup98-<br>Nup96 isoform 1<br>[Homo sapiens]                          | 1 |         |         |          |         |          |         |

|      |        |              |                                                                               |   |         |         |          |         |          |         |
|------|--------|--------------|-------------------------------------------------------------------------------|---|---------|---------|----------|---------|----------|---------|
| 2.16 | 0.65   | gi 52630326  | chromodomain-helicase-DNA-binding protein 3 isoform 1 [Homo sapiens]          | 1 |         |         |          |         |          |         |
| 2.16 | 7.489  | gi 38505222  | protein disulfide-isomerase TMX3 precursor [Homo sapiens]                     | 3 | 0.79121 | 0.71153 | 0.996528 | 0.97663 | 0.65292  | 0.96825 |
| 2.16 | 6.297  | gi 4504511   | dnaJ homolog subfamily A member 1 [Homo sapiens]                              | 1 | 0.7664  | 1.08557 | 0.631588 | 0.45396 | 0.520625 | 0.50215 |
| 2.15 | 0.742  | gi 21040326  | protein SON isoform F [Homo sapiens]                                          | 2 | 0.50701 | 0.5684  | 0.514403 | 1.07732 | 0.679063 | 1.01611 |
| 2.15 | 1.086  | gi 112382237 | synemin isoform A [Homo sapiens]                                              | 1 |         |         |          |         |          |         |
| 2.15 | 0.8696 | gi 22202611  | carboxypeptidase D isoform 1 precursor [Homo sapiens]                         | 1 | 0.98697 | 0.81086 | 1.696009 | 1.31237 | 1.248185 | 1.63565 |
| 2.15 | 1.732  | gi 17149828  | N-alpha-acetyltransferase 15, NatA auxiliary subunit [Homo sapiens]           | 1 |         |         |          |         |          |         |
| 2.15 | 0.7216 | gi 254939537 | unconventional myosin-XIX isoform 2 [Homo sapiens]                            | 1 |         |         |          |         |          |         |
| 2.15 | 1.514  | gi 333033787 | nascent polypeptide-associated complex subunit alpha isoform a [Homo sapiens] | 1 | 1.09531 | 0.98972 | 1.223688 | 0.95587 | 1.039843 | 0.96309 |

|      |        |             |                                                                                     |   |         |         |          |         |          |         |
|------|--------|-------------|-------------------------------------------------------------------------------------|---|---------|---------|----------|---------|----------|---------|
| 2.15 | 17.17  | gi 27436901 | 39S ribosomal protein L12, mitochondrial [Homo sapiens]                             | 2 | 1.43183 | 1.09845 | 1.298743 | 1.5196  | 0.923348 | 0.5195  |
| 2.15 | 3.024  | gi 5730023  | ruvB-like 2 [Homo sapiens]                                                          | 1 |         |         |          |         |          |         |
| 2.15 | 3.024  | gi 5730023  | ruvB-like 2 [Homo sapiens]                                                          | 1 |         |         |          |         |          |         |
| 2.14 | 5.155  | gi 4505119  | methyl-CpG-binding domain protein 3 [Homo sapiens]                                  | 1 |         |         |          |         |          |         |
| 2.14 | 16.38  | gi 7524346  | adenylate kinase 2, mitochondrial isoform b [Homo sapiens]                          | 4 | 1.3076  | 1.68282 | 1.177596 | 1.40287 | 1.297324 | 1.02061 |
| 2.12 | 4.242  | gi 30089972 | peroxisomal acyl-coenzyme A oxidase 1 isoform a [Homo sapiens]                      | 3 | 0.68112 | 0.64966 | 1.304939 | 0.76658 | 0.415005 | 1.11262 |
| 2.12 | 0.7937 | gi 62241042 | bifunctional glutamate/proline--tRNA ligase [Homo sapiens]                          | 1 |         |         |          |         |          |         |
| 2.12 | 3.109  | gi 37594471 | 3-hydroxyisobutyryl-CoA hydrolase, mitochondrial isoform 1 precursor [Homo sapiens] | 1 | 1.03883 | 1.04724 | 0.897887 | 0.7685  | 0.744229 | 0.95015 |
| 2.12 | 0.8649 | gi 7662180  | centrosomal protein of 104 kDa [Homo sapiens]                                       | 1 | 0.93559 | 0.78752 | 0.838642 | 0.90171 | 0.888156 | 0.80893 |
| 2.12 | 8.264  | gi 4826964  | UV excision repair protein RAD23 homolog A isoform 1 [Homo sapiens]                 | 1 |         |         |          |         |          |         |

|      |       |              |                                                                                           |    |         |         |          |         |          |         |
|------|-------|--------------|-------------------------------------------------------------------------------------------|----|---------|---------|----------|---------|----------|---------|
| 2.12 | 3.587 | gi 237820620 | glutamate-rich WD repeat-containing protein 1 [Homo sapiens]                              | 1  |         |         |          |         |          |         |
| 2.11 | 5.419 | gi 5453629   | dynactin subunit 2 isoform 1 [Homo sapiens]                                               | 2  | 1.03997 | 0.76595 | 1.000128 | 0.98143 | 0.874996 | 1.13523 |
| 2.11 | 6.579 | gi 7706497   | UMP-CMP kinase isoform a [Homo sapiens]                                                   | 2  | 0.84369 | 0.62042 | 1.25376  | 1.12914 | 1.027527 | 0.9796  |
| 2.11 | 12.78 | gi 5901926   | cleavage and polyadenylation specificity factor subunit 5 [Homo sapiens]                  | 1  | 1.40339 | 1.13078 | 2.007566 | 1.89092 | 1.45933  | 1.30963 |
| 2.1  | 2.178 | gi 4506103   | interferon-induced, double-stranded RNA-activated protein kinase isoform a [Homo sapiens] | 1  |         |         |          |         |          |         |
| 2.1  | 16.81 | gi 5902102   | small nuclear ribonucleoprotein Sm D1 [Homo sapiens]                                      | 1  | 1.06963 | 1.11104 | 1.238307 | 1.14907 | 0.987501 | 1.01882 |
| 2.09 | 10.23 | gi 153791352 | POTE ankyrin domain family member F [Homo sapiens]                                        | 45 |         |         |          |         |          |         |
| 2.09 | 1.441 | gi 27477136  | zinc finger CCCH-type antiviral protein 1 isoform 1 [Homo sapiens]                        | 1  |         |         |          |         |          |         |
| 2.09 | 5.329 | gi 45827712  | protein quaking isoform HQK-7B [Homo sapiens]                                             | 2  |         |         |          |         |          |         |

|      |       |              |                                                                                    |    |         |         |          |         |          |         |
|------|-------|--------------|------------------------------------------------------------------------------------|----|---------|---------|----------|---------|----------|---------|
| 2.08 | 7.322 | gi 5031631   | lysosome membrane protein 2 isoform 1 precursor [Homo sapiens]                     | 2  |         |         |          |         |          |         |
| 2.08 | 7.717 | gi 21389315  | tricarboxylate transport protein, mitochondrial isoform a precursor [Homo sapiens] | 1  |         |         |          |         |          |         |
| 2.08 | 2.143 | gi 4826870   | nucleobindin-2 precursor [Homo sapiens]                                            | 1  |         |         |          |         |          |         |
| 2.08 | 6.186 | gi 223555917 | protein LYRIC [Homo sapiens]                                                       | 1  |         |         |          |         |          |         |
| 2.08 | 4.658 | gi 14719402  | ribosome biogenesis regulatory protein homolog [Homo sapiens]                      | 1  | 1.01198 | 0.95753 | 0.794942 | 1.12435 | 1.176603 | 0.75437 |
| 2.08 | 3.464 | gi 255958289 | perilipin-3 isoform 2 [Homo sapiens]                                               | 1  |         |         |          |         |          |         |
| 2.08 | 10.11 | gi 4506203   | proteasome subunit beta type-7 proprotein [Homo sapiens]                           | 2  |         |         |          |         |          |         |
| 2.07 | 15.66 | gi 4826760   | heterogeneous nuclear ribonucleoprotein F [Homo sapiens]                           | 10 |         |         |          |         |          |         |
| 2.07 | 63.64 | gi 10863895  | thymosin beta-10 [Homo sapiens]                                                    | 4  | 0.95092 | 1.06945 | 1.129401 | 0.97323 | 1.04227  | 1.02178 |
| 2.07 | 1.448 | gi 133925811 | transportin-1 isoform 1 [Homo sapiens]                                             | 1  |         |         |          |         |          |         |
| 2.07 | 2.82  | gi 20070228  | nucleobindin-1 precursor [Homo sapiens]                                            | 1  |         |         |          |         |          |         |

|      |        |              |                                                                               |   |         |         |          |         |          |         |
|------|--------|--------------|-------------------------------------------------------------------------------|---|---------|---------|----------|---------|----------|---------|
| 2.07 | 3.761  | gi 42542379  | serine/arginine<br>repetitive matrix<br>protein 1 [Homo<br>sapiens]           | 2 |         |         |          |         |          |         |
| 2.07 | 10.68  | gi 83641885  | transcription factor<br>BTF3 isoform A<br>[Homo sapiens]                      | 2 | 0.84445 | 0.94586 | 0.965018 | 1.10656 | 0.886324 | 1.11327 |
| 2.07 | 5.515  | gi 17402904  | exosome complex<br>component MTR3<br>[Homo sapiens]                           | 1 | 0.73338 | 0.7553  | 0.937293 | 1.04302 | 0.94509  | 1.08138 |
| 2.06 | 3.664  | gi 117938759 | protein ALEX XLas<br>[Homo sapiens]                                           | 2 | 0.79719 | 1.3224  | 0.93709  | 1.06557 | 1.270463 | 1.04841 |
| 2.06 | 0.7087 | gi 57164975  | treacle protein<br>isoform b [Homo<br>sapiens]                                | 1 | 0.78893 | 0.91721 | 0.515189 | 0.61893 | 0.519783 | 0.68702 |
| 2.06 | 10.12  | gi 291621647 | membrane-associated<br>progesterone receptor<br>component 2 [Homo<br>sapiens] | 2 | 1.41716 | 1.55355 | 1.276417 | 1.66223 | 1.337127 | 1.38874 |
| 2.06 | 3.593  | gi 284448551 | NADH-cytochrome<br>b5 reductase 3<br>isoform 3 [Homo<br>sapiens]              | 1 | 0.67991 | 0.59962 | 1.002967 | 0.87319 | 0.970829 | 0.83486 |
| 2.06 | 2.756  | gi 4758340   | phenylalanine--tRNA<br>ligase alpha subunit<br>[Homo sapiens]                 | 1 |         |         |          |         |          |         |
| 2.06 | 1.923  | gi 48762920  | 6-<br>phosphofructokinase,<br>liver type [Homo<br>sapiens]                    | 1 |         |         |          |         |          |         |
| 2.06 | 2.917  | gi 19913424  | V-type proton<br>ATPase catalytic<br>subunit A [Homo<br>sapiens]              | 1 |         |         |          |         |          |         |

|      |       |              |                                                                                    |   |         |         |          |         |          |         |
|------|-------|--------------|------------------------------------------------------------------------------------|---|---------|---------|----------|---------|----------|---------|
| 2.06 | 6.557 | gi 13376840  | WD repeat-containing protein 61 [Homo sapiens]                                     | 1 | 1.08326 | 0.77932 | 0.993702 | 1.19976 | 0.904646 | 0.81726 |
| 2.06 | 4.157 | gi 109452587 | protein FAM98B isoform 1 [Homo sapiens]                                            | 1 | 0.92196 | 1.00054 | 1.440914 | 1.02121 | 1.427297 | 0.86005 |
| 2.06 | 20.33 | gi 212276121 | malignant T-cell-amplified sequence 1 isoform 2 [Homo sapiens]                     | 2 |         |         |          |         |          |         |
| 2.05 | 1.351 | gi 217416374 | coiled-coil domain-containing protein 164 [Homo sapiens]                           | 1 |         |         |          |         |          |         |
| 2.05 | 2.848 | gi 83700233  | eukaryotic translation initiation factor 3 subunit C [Homo sapiens]                | 1 |         |         |          |         |          |         |
| 2.05 | 2.116 | gi 123173757 | ribonucleoprotein PTB-binding 1 [Homo sapiens]                                     | 1 |         |         |          |         |          |         |
| 2.05 | 1.729 | gi 21361659  | importin-9 [Homo sapiens]                                                          | 1 |         |         |          |         |          |         |
| 2.05 | 7.317 | gi 371872778 | transmembrane and coiled-coil domain-containing protein 1 isoform b [Homo sapiens] | 1 | 1.24359 | 1.33452 | 1.106128 | 0.63591 | 1.539528 | 0.99547 |
| 2.05 | 5.414 | gi 13027602  | DDRGK domain-containing protein 1 precursor [Homo sapiens]                         | 1 |         |         |          |         |          |         |
| 2.05 | 2.146 | gi 148596949 | nucleolar and coiled-body phosphoprotein 1 [Homo sapiens]                          | 1 | 0.95672 | 0.96839 | 0.740136 | 1.56721 | 0.678062 | 0.57317 |
| 2.05 | 8.072 | gi 209969700 | coiled-coil domain-containing protein 124 [Homo sapiens]                           | 2 |         |         |          |         |          |         |

|      |       |              |                                                                                         |   |         |         |          |         |          |         |
|------|-------|--------------|-----------------------------------------------------------------------------------------|---|---------|---------|----------|---------|----------|---------|
| 2.05 | 3.07  | gi 4506753   | ruvB-like 1 [Homo sapiens]                                                              | 1 |         |         |          |         |          |         |
| 2.05 | 8.974 | gi 4506181   | proteasome subunit alpha type-2 [Homo sapiens]                                          | 2 | 1.01666 | 1.14002 | 0.840779 | 0.73922 | 0.93359  | 0.91044 |
| 2.05 | 6     | gi 83921614  | cytochrome b5 type B [Homo sapiens]                                                     | 1 | 1.75772 | 4.65792 | 2.081941 | 1.80761 | 1.731172 | 1.11116 |
| 2.04 | 1.815 | gi 150378533 | ubiquitin carboxyl-terminal hydrolase 7 [Homo sapiens]                                  | 1 |         |         |          |         |          |         |
| 2.04 | 3.695 | gi 4506209   | 26S protease regulatory subunit 7 isoform 1 [Homo sapiens]                              | 1 | 0.55722 | 1.89039 | 2.196407 | 2.30166 | 1.325583 | 1.15757 |
| 2.04 | 6     | gi 42491362  | inhibitor of nuclear factor kappa-B kinase-interacting protein isoform 2 [Homo sapiens] | 1 | 1.33451 | 0.97453 | 0.847668 | 1.18622 | 1.052938 | 0.72269 |
| 2.04 | 2.044 | gi 21070997  | stromal interaction molecule 1 precursor [Homo sapiens]                                 | 1 |         |         |          |         |          |         |
| 2.04 | 3.795 | gi 81295407  | acyl-coenzyme A thioesterase 9, mitochondrial isoform a precursor [Homo sapiens]        | 1 |         |         |          |         |          |         |
| 2.04 | 9.302 | gi 215490089 | histone deacetylase complex subunit SAP18 [Homo sapiens]                                | 1 |         |         |          |         |          |         |
| 2.04 | 4.984 | gi 16445421  | secretory carrier-associated membrane protein 3 isoform 2 [Homo sapiens]                | 1 |         |         |          |         |          |         |

|      |        |              |                                                                                           |   |         |         |          |         |          |         |
|------|--------|--------------|-------------------------------------------------------------------------------------------|---|---------|---------|----------|---------|----------|---------|
| 2.04 | 16.13  | gi 13775198  | SH3 domain-binding glutamic acid-rich-like protein 3 [Homo sapiens]                       | 1 | 1.17325 | 1.93406 | 1.533712 | 0.74937 | 2.796483 | 1.02523 |
| 2.04 | 5.556  | gi 4885413   | histidine triad nucleotide-binding protein 1 [Homo sapiens]                               | 1 | 1.08696 | 1.08068 | 1.320304 | 1.09545 | 0.955904 | 1.13904 |
| 2.03 | 0.8224 | gi 12083581  | 1-phosphatidylinositol 4,5-bisphosphate phosphodiesterase beta-1 isoform a [Homo sapiens] | 1 |         |         |          |         |          |         |
| 2.03 | 6.912  | gi 24308295  | grpE protein homolog 1, mitochondrial precursor [Homo sapiens]                            | 2 |         |         |          |         |          |         |
| 2.03 | 2.493  | gi 47458820  | signal transducer and activator of transcription 3 isoform 3 [Homo sapiens]               | 1 |         |         |          |         |          |         |
| 2.03 | 2.513  | gi 33457336  | interferon regulatory factor 2-binding protein-like [Homo sapiens]                        | 1 | 0.85583 | 0.76036 | 1.050461 | 0.80003 | 0.814673 | 0.70424 |
| 2.03 | 1.183  | gi 112789528 | cohesin subunit SA-2 isoform a [Homo sapiens]                                             | 1 | 0.43056 | 0.45479 | 0.738483 | 0.83165 | 0.690343 | 0.78841 |
| 2.03 | 2.108  | gi 156416003 | succinate dehydrogenase [ubiquinone] flavoprotein subunit, mitochondrial [Homo sapiens]   | 1 | 1.91777 | 2.26216 | 2.547209 | 1.10328 | 2.323811 | 1.762   |

|      |       |              |                                                                           |   |         |         |          |         |          |         |
|------|-------|--------------|---------------------------------------------------------------------------|---|---------|---------|----------|---------|----------|---------|
| 2.03 | 1.116 | gi 375298678 | tripartite motif-containing protein 46 isoform 3 [Homo sapiens]           | 1 |         |         |          |         |          |         |
| 2.03 | 7.303 | gi 5031597   | actin-related protein 2/3 complex subunit 3 [Homo sapiens]                | 1 | 1.13189 | 1.17068 | 1.715736 | 1.03642 | 0.949944 | 1.34422 |
| 2.03 | 4.286 | gi 156631005 | 26S proteasome non-ATPase regulatory subunit 8 [Homo sapiens]             | 1 |         |         |          |         |          |         |
| 2.03 | 1.783 | gi 20127450  | protein kinase C beta type isoform 2 [Homo sapiens]                       | 1 |         |         |          |         |          |         |
| 2.03 | 4.306 | gi 5729991   | 26S protease regulatory subunit 6B isoform 1 [Homo sapiens]               | 1 |         |         |          |         |          |         |
| 2.03 | 4.375 | gi 46593007  | cytochrome b-c1 complex subunit 1, mitochondrial precursor [Homo sapiens] | 2 |         |         |          |         |          |         |
| 2.03 | 5.389 | gi 156416000 | ubiquitin-fold modifier-conjugating enzyme 1 [Homo sapiens]               | 1 | 1.02711 | 0.9376  | 1.189223 | 1.25373 | 0.952967 | 1.2758  |
| 2.02 | 2.243 | gi 164519136 | endothelin-converting enzyme 1 isoform 3 [Homo sapiens]                   | 1 | 0.46947 | 1.08796 | 0.734908 | 0.60167 | 0.984969 | 0.70464 |
| 2.02 | 2.919 | gi 27262628  | nuclear autoantigenic sperm protein isoform 2 [Homo sapiens]              | 1 | 1.17216 | 1.29347 | 1.231107 | 1.42517 | 0.964626 | 1.11173 |

|      |       |              |                                                                          |   |         |         |          |         |          |         |
|------|-------|--------------|--------------------------------------------------------------------------|---|---------|---------|----------|---------|----------|---------|
| 2.02 | 6.757 | gi 8922331   | protein mago nashi homolog 2 [Homo sapiens]                              | 1 | 0.96856 | 0.79949 | 0.987411 | 0.42568 | 0.737719 | 0.60271 |
| 2.02 | 1.11  | gi 82799484  | cAMP-specific 3',5'-cyclic phosphodiesterase 4B isoform 3 [Homo sapiens] | 1 |         |         |          |         |          |         |
| 2.02 | 6.667 | gi 23065552  | glutathione S-transferase Mu 3 [Homo sapiens]                            | 1 |         |         |          |         |          |         |
| 2.02 | 3.957 | gi 42476108  | neuronal membrane glycoprotein M6-a isoform 1 [Homo sapiens]             | 1 | 0.96611 | 0.86918 | 0.528097 | 0.77639 | 0.964402 | 0.7135  |
| 2.02 | 7.282 | gi 4502419   | flavin reductase (NADPH) [Homo sapiens]                                  | 1 | 0.82492 | 0.76531 | 0.45059  | 0.59814 | 0.256164 | 0.86739 |
| 2.02 | 7.627 | gi 4759158   | small nuclear ribonucleoprotein Sm D2 isoform 1 [Homo sapiens]           | 1 | 0.81977 | 0.97189 | 0.852765 | 1.01776 | 0.888338 | 1.01979 |
| 2.02 | 10.87 | gi 118402586 | lactoylglutathione lyase [Homo sapiens]                                  | 1 |         |         |          |         |          |         |
| 2.01 | 12.95 | gi 31543397  | phosphoglycerate kinase 2 [Homo sapiens]                                 | 6 |         |         |          |         |          |         |
| 2.01 | 4.326 | gi 40538799  | ubiquilin-4 [Homo sapiens]                                               | 2 | 1.18846 | 1.60339 | 0.711944 | 1.67087 | 1.463316 | 1.57243 |
| 2.01 | 2.414 | gi 262359914 | excitatory amino acid transporter 1 isoform 2 [Homo sapiens]             | 2 | 1.73275 | 2.19773 | 1.971571 | 2.32741 | 1.602276 | 1.20143 |
| 2.01 | 3.667 | gi 5031599   | actin-related protein 2/3 complex subunit 2 [Homo sapiens]               | 1 | 2.27054 | 1.63589 | 2.338493 | 1.29921 | 0.955917 | 0.99613 |

|      |       |              |                                                                              |    |         |         |          |         |          |         |  |
|------|-------|--------------|------------------------------------------------------------------------------|----|---------|---------|----------|---------|----------|---------|--|
| 2.01 | 4.645 | gi 4506387   | UV excision repair protein RAD23 homolog B isoform 1 [Homo sapiens]          | 2  |         |         |          |         |          |         |  |
| 2.01 | 2.193 | gi 48526509  | mitochondrial import inner membrane translocase subunit TIM50 [Homo sapiens] | 1  |         |         |          |         |          |         |  |
| 2.01 | 7.339 | gi 10801345  | eukaryotic translation initiation factor 3 subunit K [Homo sapiens]          | 2  |         |         |          |         |          |         |  |
| 2.01 | 5.859 | gi 21361565  | ATP synthase subunit b, mitochondrial precursor [Homo sapiens]               | 1  |         |         |          |         |          |         |  |
| 2.01 | 9.434 | gi 4506629   | 60S ribosomal protein L29 [Homo sapiens]                                     | 1  | 1.17387 | 1.89628 | 1.432563 | 1.65658 | 1.126862 | 1.46405 |  |
| 2.01 | 11.5  | gi 5032133   | eukaryotic translation initiation factor 1 [Homo sapiens]                    | 1  |         |         |          |         |          |         |  |
| 2    | 21.54 | gi 4507951   | 14-3-3 protein eta [Homo sapiens]                                            | 10 |         |         |          |         |          |         |  |
| 2    | 5.545 | gi 109240550 | paraspeckle component 1 [Homo sapiens]                                       | 3  | 0.87887 | 1.04839 | 0.999175 | 0.77477 | 0.444983 | 0.87935 |  |
| 2    | 9.79  | gi 5453599   | F-actin-capping protein subunit alpha-2 [Homo sapiens]                       | 2  | 1.68511 | 1.74422 | 1.030252 | 0.81911 | 1.008209 | 0.92859 |  |
| 2    | 11.84 | gi 8923557   | protein C20orf11 [Homo sapiens]                                              | 2  |         |         |          |         |          |         |  |

|   |       |              |                                                                            |   |         |         |          |         |          |         |
|---|-------|--------------|----------------------------------------------------------------------------|---|---------|---------|----------|---------|----------|---------|
| 2 | 6.806 | gi 4504001   | gap junction alpha-1 protein [Homo sapiens]                                | 2 |         |         |          |         |          |         |
| 2 | 1.751 | gi 16306548  | serine--tRNA ligase, cytoplasmic [Homo sapiens]                            | 1 |         |         |          |         |          |         |
| 2 | 4.595 | gi 40806190  | TMEM189-UBE2V1 fusion protein [Homo sapiens]                               | 2 | 1.07323 | 0.77767 | 0.860442 | 0.77759 | 0.910226 | 1.2448  |
| 2 | 2.063 | gi 32307144  | procollagen-lysine,2-oxoglutarate 5-dioxygenase 1 precursor [Homo sapiens] | 2 |         |         |          |         |          |         |
| 2 | 4.665 | gi 31377663  | armadillo repeat-containing protein 10 isoform a [Homo sapiens]            | 1 |         |         |          |         |          |         |
| 2 | 8.78  | gi 22538465  | proteasome subunit beta type-3 [Homo sapiens]                              | 2 |         |         |          |         |          |         |
| 2 | 3.169 | gi 116256489 | septin-9 isoform c [Homo sapiens]                                          | 1 |         |         |          |         |          |         |
| 2 | 3.409 | gi 24430151  | 26S protease regulatory subunit 4 [Homo sapiens]                           | 2 |         |         |          |         |          |         |
| 2 | 2.318 | gi 14589889  | cadherin-2 preproprotein [Homo sapiens]                                    | 1 |         |         |          |         |          |         |
| 2 | 8.553 | gi 4505893   | proteolipid protein 2 [Homo sapiens]                                       | 1 | 1.02496 | 0.98235 | 1.004735 | 1.11342 | 0.972551 | 1.01897 |
| 2 | 16.76 | gi 13376717  | optic atrophy 3 protein isoform b [Homo sapiens]                           | 1 |         |         |          |         |          |         |
| 2 | 2.195 | gi 112789562 | gamma-interferon-inducible protein 16 isoform 2 [Homo sapiens]             | 1 | 1.037   | 0.5475  | 0.795671 | 0.88866 | 0.763422 | 0.71412 |

|   |       |              |                                                                                                                                |   |         |         |          |         |          |         |
|---|-------|--------------|--------------------------------------------------------------------------------------------------------------------------------|---|---------|---------|----------|---------|----------|---------|
| 2 | 4.583 | gi 149193321 | G-rich sequence<br>factor 1 isoform 1<br>[Homo sapiens]                                                                        | 1 |         |         |          |         |          |         |
| 2 | 3.788 | gi 58761500  | obg-like ATPase 1<br>isoform 1 [Homo<br>sapiens]                                                                               | 2 |         |         |          |         |          |         |
| 2 | 10.14 | gi 7705636   | vesicle transport<br>protein GOT1B<br>[Homo sapiens]                                                                           | 1 | 6.49616 | 2.27653 | 4.414598 | 4.37636 | 2.95415  | 3.01594 |
| 2 | 5.234 | gi 4506491   | replication factor C<br>subunit 4 [Homo<br>sapiens]                                                                            | 1 |         |         |          |         |          |         |
| 2 | 9.418 | gi 5174723   | mitochondrial import<br>receptor subunit<br>TOM40 homolog<br>[Homo sapiens]                                                    | 2 |         |         |          |         |          |         |
| 2 | 3.65  | gi 21264355  | SWI/SNF-related<br>matrix-associated<br>actin-dependent<br>regulator of<br>chromatin subfamily<br>E member 1 [Homo<br>sapiens] | 1 |         |         |          |         |          |         |
| 2 | 11.96 | gi 4507129   | small nuclear<br>ribonucleoprotein E<br>[Homo sapiens]                                                                         | 3 | 0.9772  | 0.90978 | 1.049372 | 1.20251 | 1.077493 | 0.90789 |
| 2 | 7.246 | gi 70608174  | tumor protein D52<br>isoform 2 [Homo<br>sapiens]                                                                               | 1 |         |         |          |         |          |         |
| 2 | 12.82 | gi 13491174  | MARCKS-related<br>protein [Homo<br>sapiens]                                                                                    | 2 | 1.18191 | 1.19468 | 1.390571 | 1.32367 | 1.278538 | 1.18775 |
| 2 | 9.028 | gi 260763955 | NADH<br>dehydrogenase<br>[ubiquinone] 1 alpha<br>subcomplex subunit<br>13 [Homo sapiens]                                       | 1 |         |         |          |         |          |         |

|   |       |              |                                                                                        |   |         |         |          |         |          |         |
|---|-------|--------------|----------------------------------------------------------------------------------------|---|---------|---------|----------|---------|----------|---------|
| 2 | 4.016 | gi 222080062 | NADH dehydrogenase [ubiquinone] flavoprotein 2, mitochondrial precursor [Homo sapiens] | 1 |         |         |          |         |          |         |
| 2 | 6.771 | gi 93277094  | protein FAM210B [Homo sapiens] cleavage and polyadenylation specificity factor         | 1 | 1.49494 | 1.14174 | 2.094259 | 3.25341 | 2.226591 | 2.03697 |
| 2 | 4.864 | gi 217035102 | subunit 7 isoform 1 [Homo sapiens] peptidyl-prolyl cis-trans isomerase                 | 1 |         |         |          |         |          |         |
| 2 | 10.56 | gi 206725530 | FKBP2 precursor [Homo sapiens] small nuclear ribonucleoprotein G [Homo sapiens]        | 1 |         |         |          |         |          |         |
| 2 | 15.79 | gi 4507133   |                                                                                        | 1 |         |         |          |         |          |         |
| 2 | 6.18  | gi 6005794   | PRA1 family protein 2 [Homo sapiens]                                                   | 1 | 1.1698  | 1.31058 | 1.179651 | 1.26741 | 1.467394 | 1.16345 |
| 2 | 7.568 | gi 6005884   | translocon-associated protein subunit gamma [Homo sapiens]                             | 1 | 1.20281 | 1.13479 | 1.173929 | 1.2955  | 0.868648 | 0.98349 |
| 2 | 14.74 | gi 11024700  | mitochondrial import inner membrane translocase subunit Tim13 [Homo sapiens]           | 4 |         |         |          |         |          |         |
| 2 | 10.11 | gi 5453704   | PRA1 family protein 3 [Homo sapiens]                                                   | 1 | 2.88799 | 0.96158 | 2.671536 | 0.63546 | 1.864812 | 1.05061 |
| 2 | 7.254 | gi 4507605   | CD70 antigen [Homo sapiens]                                                            | 1 |         |         |          |         |          |         |

|   |       |              |                                                                                    |   |         |         |          |         |          |         |
|---|-------|--------------|------------------------------------------------------------------------------------|---|---------|---------|----------|---------|----------|---------|
| 2 | 3.175 | gi 5870893   | sodium-coupled neutral amino acid transporter 3 [Homo sapiens]                     | 1 | 0.79604 | 1.03163 | 0.501218 | 0.83569 | 0.968156 | 0.28512 |
| 2 | 3.686 | gi 25470886  | DAZ-associated protein 1 isoform b [Homo sapiens]                                  | 1 |         |         |          |         |          |         |
| 2 | 5.24  | gi 282165814 | transmembrane emp24 domain-containing protein 5 isoform 1 precursor [Homo sapiens] | 1 |         |         |          |         |          |         |
| 2 | 8.553 | gi 4758714   | microsomal glutathione S-transferase 3 [Homo sapiens]                              | 2 | 1.07214 | 0.77882 | 1.157946 | 0.94076 | 1.049032 | 1.0345  |
| 2 | 15.23 | gi 5453678   | epididymal secretory protein E1 precursor [Homo sapiens]                           | 1 |         |         |          |         |          |         |
| 2 | 4.58  | gi 18379349  | synaptic vesicle membrane protein VAT-1 homolog [Homo sapiens]                     | 2 |         |         |          |         |          |         |
| 2 | 10.78 | gi 46276863  | parathyrosin [Homo sapiens]                                                        | 1 | 0.75017 | 1.47755 | 1.608629 | 1.14413 | 1.249661 | 1.06365 |
| 2 | 20.2  | gi 14211889  | protein dpy-30 homolog [Homo sapiens]                                              | 1 | 1.06193 | 0.74713 | 0.785391 | 1.0061  | 0.706888 | 0.70462 |
| 2 | 8.791 | gi 7657176   | protein canopy homolog 2 isoform 1 precursor [Homo sapiens]                        | 1 |         |         |          |         |          |         |
| 2 | 14.53 | gi 7657609   | signal peptidase complex catalytic subunit SEC11A [Homo sapiens]                   | 1 |         |         |          |         |          |         |

|      |       |              |                                                                                     |   |         |         |          |         |          |         |
|------|-------|--------------|-------------------------------------------------------------------------------------|---|---------|---------|----------|---------|----------|---------|
| 2    | 4.911 | gi 4503727   | peptidyl-prolyl cis-trans isomerase FKBP3 [Homo sapiens]                            | 1 | 0.6618  | 0.88653 | 0.711606 | 0.64077 | 0.791742 | 0.88282 |
| 2    | 5.425 | gi 5032069   | splicing factor 3B subunit 4 [Homo sapiens]                                         | 1 |         |         |          |         |          |         |
| 2    | 4.032 | gi 221316575 | lymphocyte function-associated antigen 3 isoform 2 [Homo sapiens]                   | 1 | 1.10848 | 0.95693 | 1.071785 | 0.83056 | 0.940833 | 0.95787 |
| 2    | 8.475 | gi 341915584 | PREDICTED: prothymosin alpha-like [Homo sapiens]                                    | 1 | 1.05324 | 1.3211  | 1.186233 | 1.03384 | 1.033843 | 1.26186 |
| 1.95 | 2.64  | gi 259155315 | mitochondrial 2-oxoglutarate/malate carrier protein isoform 2 [Homo sapiens]        | 1 | 1.82798 | 2.05946 | 1.756294 | 1.94721 | 1.415    | 1.33975 |
| 1.93 | 11.86 | gi 5729850   | guanine nucleotide-binding protein G(k) subunit alpha [Homo sapiens]                | 3 | 0.56981 | 0.66885 | 0.601442 | 0.40964 | 0.354968 | 0.60163 |
| 1.92 | 6.077 | gi 4502227   | ADP-ribosylation factor-like protein 1 [Homo sapiens]                               | 1 |         |         |          |         |          |         |
| 1.85 | 7.519 | gi 4503659   | ubiquitin-like protein fubi and ribosomal protein S30 precursor [Homo sapiens]      | 1 | 1.93251 | 0.52726 | 0.873157 | 1.16378 | 0.939255 | 1.03131 |
| 1.83 | 1.74  | gi 52485606  | formin-like protein 2 [Homo sapiens]                                                | 2 |         |         |          |         |          |         |
| 1.8  | 3.93  | gi 4505585   | platelet-activating factor acetylhydrolase IB subunit beta isoform a [Homo sapiens] | 1 |         |         |          |         |          |         |

|      |       |              |                                                                                      |    |         |         |          |         |          |         |
|------|-------|--------------|--------------------------------------------------------------------------------------|----|---------|---------|----------|---------|----------|---------|
| 1.8  | 2.545 | gi 68508955  | CD97 antigen isoform 3 preproprotein [Homo sapiens]                                  | 1  |         |         |          |         |          |         |
| 1.79 | 3.438 | gi 45021     | REVERSED annexin A5 [Homo sapiens]                                                   | 1  |         |         |          |         |          |         |
| 1.77 | 10.26 | gi 73912720  | mitochondrial inner membrane organizing system protein 1 isoform a [Homo sapiens]    | 1  | 1.21962 | 0.9844  | 0.784586 | 0.64946 | 1.253601 | 1.76032 |
| 1.76 | 1.531 | gi 157388967 | coiled-coil domain-containing protein 87 [Homo sapiens]                              | 2  | 0.85902 | 0.99372 | 1.045406 | 0.93941 | 1.111446 | 0.61127 |
| 1.7  | 35.73 | gi 14141161  | nuclear heterogeneous ribonucleoprotein U isoform b [Homo sapiens]                   | 34 | 1.76342 | 1.10382 | 1.33401  | 1.0886  | 1.327369 | 1.53358 |
| 1.7  | 11.64 | gi 334688844 | glial fibrillary acidic protein isoform 3 [Homo sapiens]                             | 7  | 0.91713 | 0.81444 | 1.222358 | 1.12989 | 1.145062 | 1.32143 |
| 1.7  | 5.932 | gi 6005890   | transcription elongation factor B polypeptide 2 isoform a [Homo sapiens]             | 1  |         |         |          |         |          |         |
| 1.7  | 11.64 | gi 334688844 | glial fibrillary acidic protein isoform 3 [Homo sapiens]                             | 7  | 0.91713 | 0.81444 | 1.222358 | 1.12989 | 1.145062 | 1.32143 |
| 1.69 | 19.01 | gi 4506587   | replication protein A 14 kDa subunit [Homo sapiens]                                  | 1  |         |         |          |         |          |         |
| 1.68 | 4.93  | gi 50659074  | ATP synthase lipid-binding protein, mitochondrial isoform A precursor [Homo sapiens] | 1  | 0.92016 | 0.90905 | 0.935273 | 1.02621 | 1.145511 | 0.92555 |

|      |        |              |                                                                                                |   |         |         |          |         |          |         |
|------|--------|--------------|------------------------------------------------------------------------------------------------|---|---------|---------|----------|---------|----------|---------|
|      |        |              | tRNA                                                                                           |   |         |         |          |         |          |         |
| 1.66 | 11.2   | gi 7705477   | methyltransferase 112 homolog [Homo sapiens]                                                   | 1 |         |         |          |         |          |         |
| 1.64 | 1.229  | gi 122939157 | gem-associated protein 4 [Homo sapiens]                                                        | 2 |         |         |          |         |          |         |
| 1.62 | 4.93   | gi 4504347   | hemoglobin subunit alpha [Homo sapiens]                                                        | 1 | 1.59508 | 0.66166 | 1.879694 | 0.99311 | 1.061659 | 0.51581 |
| 1.62 | 5.797  | gi 6678271   | TAR DNA-binding protein 43 [Homo sapiens]                                                      | 2 |         |         |          |         |          |         |
| 1.6  | 1.143  | gi 116256464 | uncharacterized protein C2orf55 [Homo sapiens]                                                 | 2 |         |         |          |         |          |         |
| 1.6  | 2.105  | gi 28178838  | isocitrate dehydrogenase [NAD] subunit gamma, mitochondrial isoform b precursor [Homo sapiens] | 1 |         |         |          |         |          |         |
| 1.6  | 2.256  | RRRgi 166235 | REVERSED DNA damage-regulated autophagy modulator protein 2 [Homo sapiens]                     | 1 |         |         |          |         |          |         |
| 1.57 | 0.5336 | gi 297207099 | AT-rich interactive domain-containing protein 1B isoform 2 [Homo sapiens]                      | 1 |         |         |          |         |          |         |
| 1.55 | 3.918  | gi 311893345 | copine-1 isoform c [Homo sapiens]                                                              | 1 |         |         |          |         |          |         |
| 1.54 | 0.503  | gi 61676188  | E3 ubiquitin-protein ligase HUWE1 [Homo sapiens]                                               | 1 | 1.09776 | 1.27215 | 0.877703 | 1.14276 | 0.851826 | 0.89419 |

|      |        |              |                                                                                                              |   |         |         |          |         |          |         |
|------|--------|--------------|--------------------------------------------------------------------------------------------------------------|---|---------|---------|----------|---------|----------|---------|
| 1.54 | 7.469  | gi 4506193   | proteasome subunit<br>beta type-1 [Homo<br>sapiens]                                                          | 1 | 1.43887 | 2.04849 | 1.395369 | 1.22527 | 1.514252 | 1.1148  |
| 1.51 | 3.981  | gi 4557237   | acetyl-CoA<br>acetyltransferase,<br>mitochondrial                                                            | 1 | 1.24819 | 1.1585  | 1.084654 | 0.95572 | 0.973047 | 1.16623 |
| 1.51 | 3.233  | gi 68799814  | precursor [Homo<br>sapiens]<br>AP-2 complex<br>subunit mu isoform b<br>[Homo sapiens]                        | 1 |         |         |          |         |          |         |
| 1.5  | 0.8475 | gi 30578410  | dolichyl-<br>diphosphooligosacch<br>aride--protein<br>glycosyltransferase<br>subunit STT3B<br>[Homo sapiens] | 1 |         |         |          |         |          |         |
| 1.5  | 0.8706 | gi 39780588  | pre-rRNA-processing<br>protein TSR1<br>homolog [Homo<br>sapiens]                                             | 1 | 0.90888 | 1.05537 | 0.932494 | 0.94253 | 1.05303  | 1.22672 |
| 1.5  | 1.675  | gi 333360851 | serpin H1 precursor<br>[Homo sapiens]                                                                        | 1 | 0.72935 | 0.7743  | 0.915738 | 0.72061 | 0.754026 | 0.75084 |
| 1.49 | 4.762  | gi 70906441  | deoxyuridine 5'-<br>triphosphate<br>nucleotidohydrolase,<br>mitochondrial                                    | 1 | 2.0039  | 0.45709 | 1.823647 | 0.98667 | 1.09756  | 1.21117 |
| 1.48 | 4.02   | gi 312596881 | isoform 1 precursor<br>[Homo sapiens]<br>26S protease<br>regulatory subunit 8<br>isoform 2 [Homo<br>sapiens] | 1 |         |         |          |         |          |         |
| 1.47 | 1.849  | gi 18426915  | drebrin isoform a<br>[Homo sapiens]                                                                          | 1 |         |         |          |         |          |         |

|      |       |              |                                                                                            |    |         |         |          |         |          |         |
|------|-------|--------------|--------------------------------------------------------------------------------------------|----|---------|---------|----------|---------|----------|---------|
| 1.47 | 1.98  | gi 4503915   | trifunctional purine biosynthetic protein adenosine-3 isoform 1 [Homo sapiens]             | 1  | 1.39568 | 1.34603 | 0.916473 | 0.99879 | 1.676535 | 1.02895 |
| 1.47 | 1.44  | gi 296841091 | protein kinase C and casein kinase substrate in neurons protein 2 isoform A [Homo sapiens] | 1  |         |         |          |         |          |         |
| 1.47 | 1.626 | gi 139394599 | hypermethylated in cancer 2 protein [Homo sapiens]                                         | 1  | 1.13664 | 1.05848 | 0.96557  | 1.0482  | 1.011859 | 0.96627 |
| 1.46 | 1.559 | gi 8051636   | exportin-T [Homo sapiens]                                                                  | 1  |         |         |          |         |          |         |
| 1.45 | 1.241 | gi 359279861 | dihydropyrimidinase-related protein 5 [Homo sapiens]                                       | 1  |         |         |          |         |          |         |
| 1.44 | 3.081 | gi 4503519   | eukaryotic translation initiation factor 3 subunit F [Homo sapiens]                        | 1  |         |         |          |         |          |         |
| 1.38 | 7.634 | gi 4757926   | RNA-binding protein 39 isoform b [Homo sapiens]                                            | 2  |         |         |          |         |          |         |
| 1.36 | 4.233 | gi 115430112 | receptor expression-enhancing protein 5 [Homo sapiens]                                     | 1  | 0.81179 | 1.07698 | 1.398986 | 0.48126 | 1.126422 | 1.05482 |
| 1.31 | 59.91 | gi 14389309  | tubulin alpha-1C chain [Homo sapiens]                                                      | 53 |         |         |          |         |          |         |
| 1.31 | 3.704 | gi 52426743  | luc7-like protein 3 [Homo sapiens]                                                         | 1  |         |         |          |         |          |         |

|     |       |            |                                                                                                         |   |         |         |          |         |          |         |
|-----|-------|------------|---------------------------------------------------------------------------------------------------------|---|---------|---------|----------|---------|----------|---------|
| 1.3 | 3.965 | gi 8923390 | coiled-coil-helix-coiled-coil-helix domain-containing protein 3, mitochondrial precursor [Homo sapiens] | 1 | 0.85987 | 0.85484 | 0.750112 | 1.52743 | 0.919463 | 0.55202 |
|-----|-------|------------|---------------------------------------------------------------------------------------------------------|---|---------|---------|----------|---------|----------|---------|
