# Supplementary material for: Upregulation of Glycolytic Enzymes, Mitochondrial Dysfunction and Increased Cytotoxicity in Glial Cells Treated with Alzheimer’s Disease Plasma
Source: PubMed Central journal article supplement (PMC4364672; doi:10.1371/journal.pone.0116092), 2015-03-18
Supplement: pone.0116092.s005.pdf [file pone.0116092.s005.pdf]

**Table S3**

Protein, Peptide and Spectral level False Discovery Rates Analysis results from Protein Pilot v4.0

Single Table Summary of All Results

|                                                    | Data Level       | FDR Type  | FDR          | ID Yield     |
|----------------------------------------------------|------------------|-----------|--------------|--------------|
| Identification Yield<br>at FDR Threshold           | Protein          | Local     | 1%           | 721          |
|                                                    |                  |           | <b>5%</b>    | <b>750</b>   |
|                                                    |                  |           | 10%          | 773          |
|                                                    |                  | Global    | <b>1%</b>    | <b>803</b>   |
|                                                    |                  |           | 5%           | 882          |
|                                                    |                  |           | 10%          | 951          |
|                                                    | Distinct peptide | Local     | 1%           | 5033         |
|                                                    |                  |           | <b>5%</b>    | <b>6325</b>  |
|                                                    |                  |           | 10%          | 6869         |
|                                                    |                  | Global    | <b>1%</b>    | <b>6733</b>  |
|                                                    |                  |           | 5%           | 8297         |
|                                                    |                  |           | 10%          | 9351         |
| Spectral                                           | Local            | 1%        | 26526        |              |
|                                                    |                  | <b>5%</b> | <b>33626</b> |              |
|                                                    |                  | 10%       | 36751        |              |
|                                                    | Global           | <b>1%</b> | <b>35876</b> |              |
|                                                    |                  | 5%        | 44801        |              |
|                                                    |                  | 10%       | 50901        |              |
| Corresponding Confidence in ProteinPilot™ Software | Protein          | Local     | 1%           | 99.0%        |
|                                                    |                  |           | <b>5%</b>    | <b>97.7%</b> |
|                                                    |                  |           | 10%          | 96.6%        |
|                                                    |                  | Global    | <b>1%</b>    | <b>93.4%</b> |
|                                                    |                  |           | 5%           | 81.4%        |
|                                                    |                  |           | 10%          | 69.1%        |
|                                                    | Distinct peptide | Local     | 1%           | 99.1%        |
|                                                    |                  |           | <b>5%</b>    | <b>93.9%</b> |
|                                                    |                  |           | 10%          | 86.3%        |
|                                                    |                  | Global    | <b>1%</b>    | <b>88.8%</b> |
|                                                    |                  |           | 5%           | 53.8%        |
|                                                    |                  |           | 10%          | 38.2%        |
| Spectral                                           | Local            | 1%        | 97.4%        |              |
|                                                    |                  | <b>5%</b> | <b>79.1%</b> |              |
|                                                    |                  | 10%       | 62.0%        |              |
|                                                    | Global           | <b>1%</b> | <b>67.0%</b> |              |
|                                                    |                  | 5%        | 27.9%        |              |
|                                                    |                  | 10%       | 16.1%        |              |
